# Supplementary material for: Molecular Evolution of Peptide Ligands with Custom-Tailored Characteristics for Targeting of Glycostructures
Source: PubMed Central journal article supplement (PMC3521706; doi:10.1371/journal.pcbi.1002800), 2012-12-13

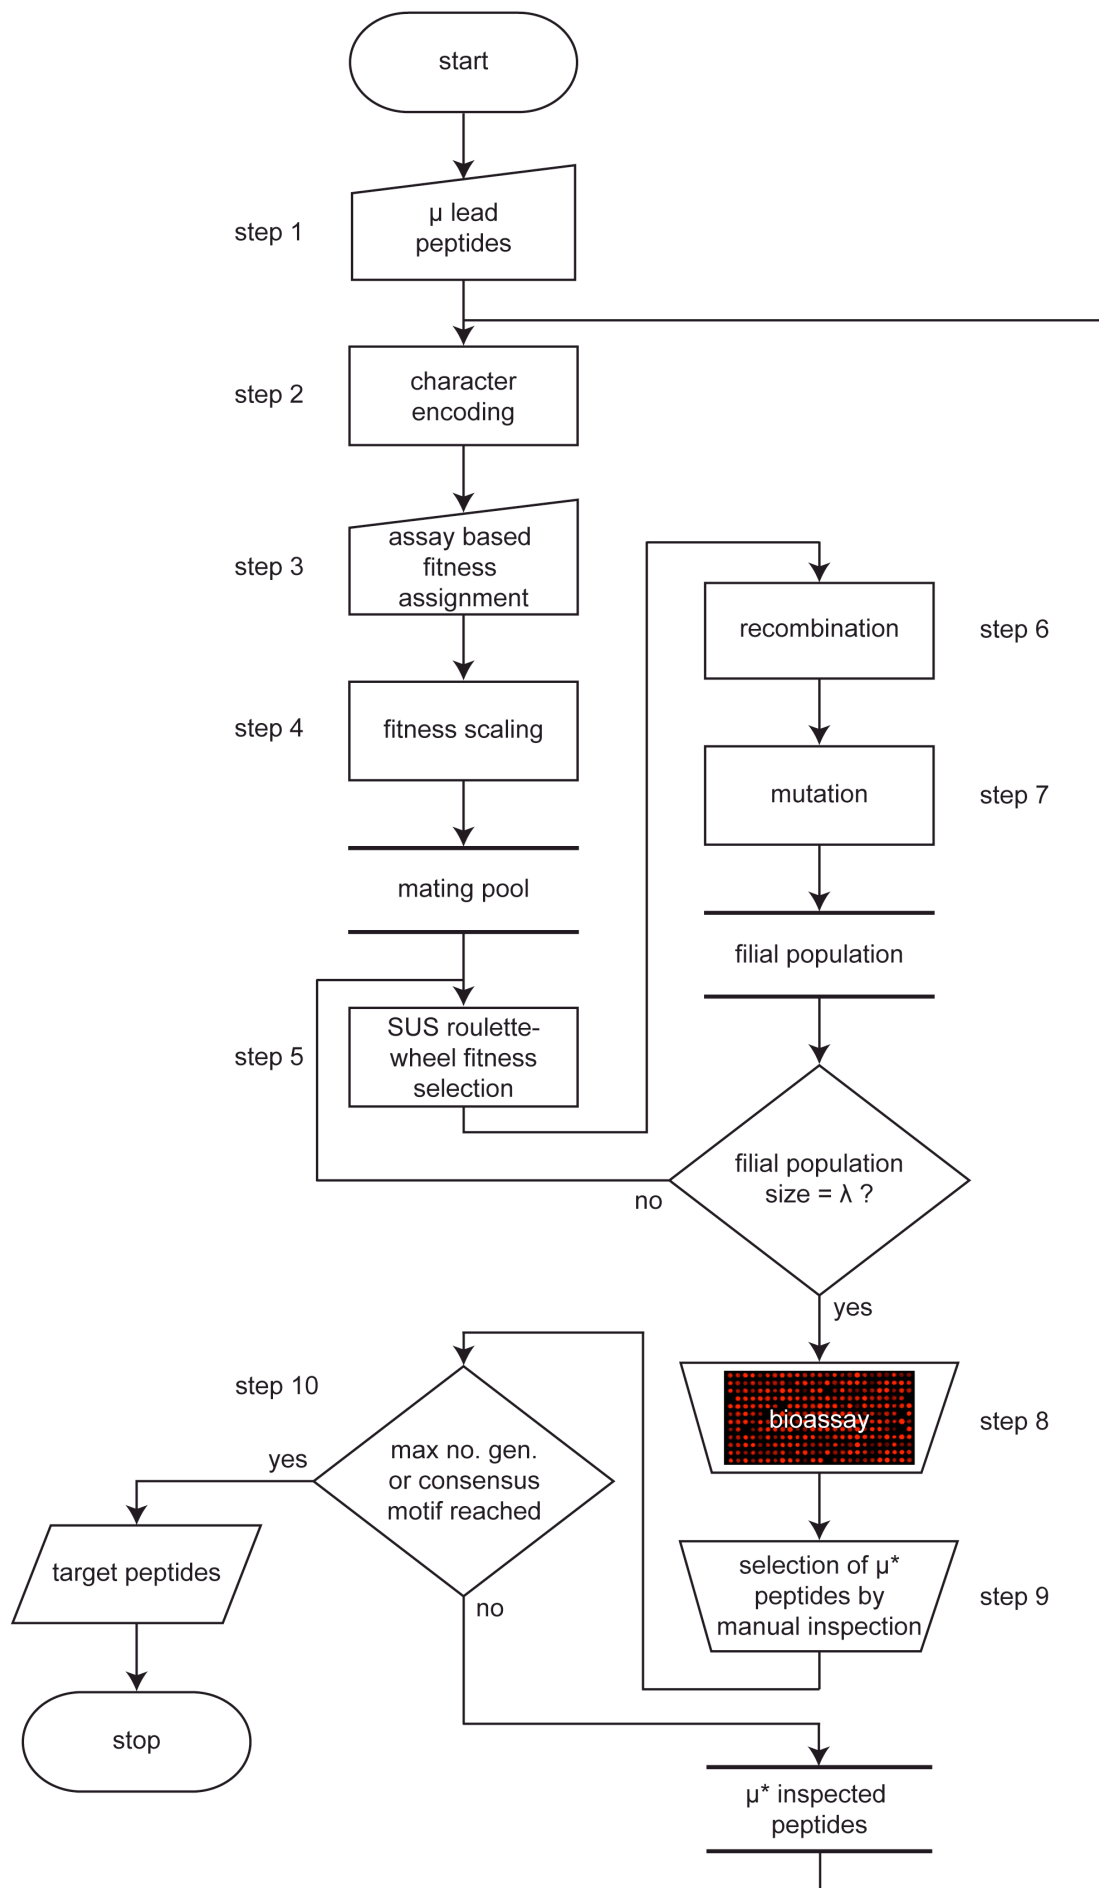

Supplement: pcbi.1002800.s001.pdf [file pcbi.1002800.s001.pdf]
