# Supplementary material for: Molecular Evolution of Peptide Ligands with Custom-Tailored Characteristics for Targeting of Glycostructures
Source: PubMed Central journal article supplement (PMC3521706; doi:10.1371/journal.pcbi.1002800), 2012-12-13
Supplement: pcbi.1002800.s002.pdf [file pcbi.1002800.s002.pdf]

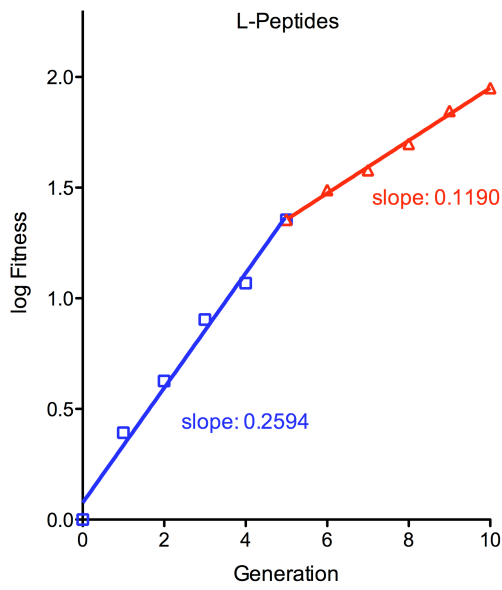

- linear regression of log fitness (generation 0-5)  
→ average improvement per generation: 1.8fold
- ▲ linear regression of log fitness (generation 5-10)  
→ average improvement per generation: 1.3fold

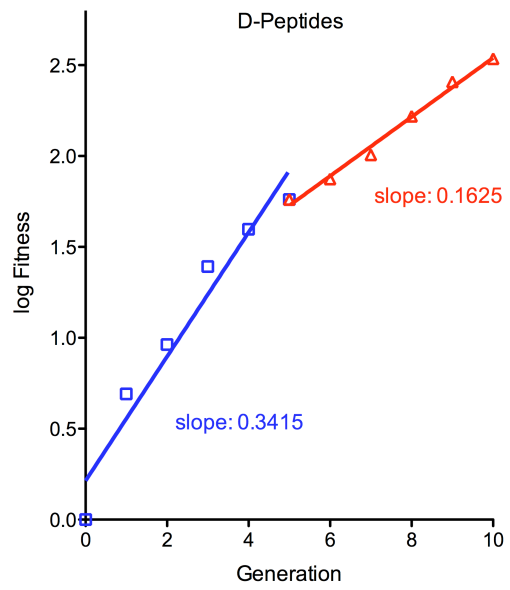

- linear regression of log fitness (generation 0-5)  
→ average improvement per generation: 2.2fold
- ▲ linear regression of log fitness (generation 5-10)  
→ average improvement per generation: 1.5fold
