# Supplementary material for: Molecular Evolution of Peptide Ligands with Custom-Tailored Characteristics for Targeting of Glycostructures
Source: PubMed Central journal article supplement (PMC3521706; doi:10.1371/journal.pcbi.1002800), 2012-12-13
Supplement: pcbi.1002800.s004.pdf [file pcbi.1002800.s004.pdf]

**Table S2: List of all peptides generated in the course of the evolutionary process of optimization for G<sub>M1</sub>-binding.** All peptides were synthesized on cellulose membranes (200 peptides each generation) and analyzed for target binding with a fluorophore-labeled G<sub>M1</sub>-derivative. Fitness values were assigned to each peptide according to fluorescence signals obtained in this binding assay. Peptides are listed from the top-ranked peptide (1) to the peptide sequence displaying the lowest binding affinity for the G<sub>M1</sub> probe (200) for each optimization cycle (“generation”). The top candidates of each generation which were selected as parent peptides for the next generation are written in boldface, these peptides (designated “lead peptides”) were synthesized again onto the cellulose membrane carrying the filial peptides to enable standardization. Fitness values for all peptides are given, both measured fluorescence intensities (x; arbitrary units) and values standardized across all generations (c) for direct comparison of peptides from different generations.

L-peptide sequences

|    | Generation 1a            | x     | c    | Generation 1b            | x     | c    | Generation 2              | x      | c    | Generation3a               | x      | c    |
|----|--------------------------|-------|------|--------------------------|-------|------|---------------------------|--------|------|----------------------------|--------|------|
| 1  | <b>GWYKGTAFWQLRQPG</b>   | 61.99 | 2.18 | <b>YPRHRTGIYICNVRF</b>   | 71.89 | 2.52 | <b>GWWEKLCVWGRINMHM</b>   | 181.90 | 5.85 | <b>GWWEKLCVWGRQNQPA</b>    | 252.14 | 9.61 |
| 2  | <b>DFRRLKGAFWQSIGRF</b>  | 59.08 | 2.07 | <b>DPMQRTGILFISYRF</b>   | 67.81 | 2.38 | <b>MPRHRDTEVWAVSKLG</b>   | 160.27 | 5.15 | <b>GWWEKLCVWDFCERK</b>     | 217.07 | 8.27 |
| 3  | <b>AEVNWKGAFWQLRQPA</b>  | 55.82 | 1.96 | <b>LVRHRLRGLKSIYRF</b>   | 64.09 | 2.25 | <b>AEVNWKGAFWDFIERK</b>   | 116.19 | 3.74 | <b>GWWEKLCVWGRINMHM</b>    | 188.10 | 7.17 |
| 4  | <b>VWRLLKELWVHVKKLG</b>  | 54.15 | 1.90 | <b>MPRHRDTGVLSIGRF</b>   | 63.98 | 2.25 | <b>AKVERLCVWVWNIHGA</b>   | 113.47 | 3.65 | <b>VWRELLKAWGRINMHM</b>    | 186.03 | 7.09 |
| 5  | <b>AKVEKLCVWVSVKKG</b>   | 52.95 | 1.86 | <b>LGYHRATLNDFIGRK</b>   | 63.02 | 2.21 | <b>LDRAYAKWCLWMTDF</b>    | 112.99 | 3.63 | <b>GWWEKLCVWGRINMHG</b>    | 175.18 | 6.67 |
| 6  | <b>PQIAMFCFAWQLRQPA</b>  | 51.37 | 1.80 | <b>GKTHRATRLDYIGRY</b>   | 54.91 | 1.93 | <b>DFQRWKGAFWQLRQPA</b>   | 108.95 | 3.50 | <b>GWWEKLCVWGRINMHM</b>    | 170.99 | 6.51 |
| 7  | <b>AKVEKLCFAWQLRQPA</b>  | 50.26 | 1.76 | <b>LPTFFYTGFLCSIGDC</b>  | 54.70 | 1.92 | <b>VWRLLKKAFAWQLRQPG</b>  | 100.93 | 3.24 | <b>VWWEKLCVWGRINMHM</b>    | 161.66 | 6.16 |
| 8  | <b>DFRRLKVEVHVHVKKLG</b> | 48.30 | 1.70 | <b>LPRLRDFVILFISIERY</b> | 53.94 | 1.89 | <b>VWRLLKELWVHVKKLG</b>   | 98.12  | 3.15 | <b>GWWEKLCVWGRQNQSN</b>    | 158.72 | 6.05 |
| 9  | <b>GWYKGTGILVLIGMF</b>   | 47.66 | 1.67 | <b>LRFACRTYILDVIGRC</b>  | 53.68 | 1.88 | <b>KKFFYYTGFGLSIGDC</b>   | 97.21  | 3.13 | <b>GWWEKLCVWGRINQPA</b>    | 142.42 | 5.43 |
| 10 | <b>LPRVKNRTGILAFIGRF</b> | 46.91 | 1.65 | <b>LPRQRDTGILVVIYRQ</b>  | 51.40 | 1.80 | <b>EKVERLGAFWVSGIGRF</b>  | 96.06  | 3.09 | <b>AEVNWKGAFWCSRLG</b>     | 142.02 | 5.41 |
| 11 | <b>GWYKGTARFVNIHGA</b>   | 45.44 | 1.59 | <b>LPRHDYTMILLTYGRF</b>  | 50.36 | 1.77 | <b>DWFLKLCVWVSVKKG</b>    | 93.96  | 3.02 | <b>GWWEKLCVWGRILIGDC</b>   | 134.85 | 5.14 |
| 12 | <b>DFRRLPKAFWQLYHNT</b>  | 43.47 | 1.53 | <b>LTRRNLTGILSSTYRF</b>  | 46.19 | 1.62 | <b>TINKAWTLNDFDIFGRK</b>  | 89.12  | 2.87 | <b>AEVHRDSEVWVAVSKLG</b>   | 133.99 | 5.11 |
| 13 | <b>LWYQGRARFVSAHPA</b>   | 42.21 | 1.48 | <b>DFRHRNFVQGLIFRF</b>   | 45.26 | 1.59 | <b>SEVRWKGAFWQLRWDN</b>   | 87.58  | 2.82 | <b>GWWEYLCSVWVNIHMRK</b>   | 131.44 | 5.01 |
| 14 | <b>GALSETYSLWTEYNGA</b>  | 41.54 | 1.46 | <b>KLRVRDFVILDGYGRF</b>  | 43.72 | 1.53 | <b>GWVHRTYGIYVNVRF</b>    | 79.03  | 2.54 | <b>AEVNWKGAWVWNIHGA</b>    | 125.98 | 4.80 |
| 15 | <b>EKVEKLCVWGRINMHM</b>  | 40.29 | 1.41 | <b>RVRHAKTLLYSIGRF</b>   | 43.67 | 1.53 | <b>LPKFYTGFLCSIKLG</b>    | 78.33  | 2.52 | <b>RKFFYYTGFLGVKRLG</b>    | 125.50 | 4.78 |
| 16 | <b>GALSETYSFINRLLEPA</b> | 40.22 | 1.41 | <b>KKFTRDTGILKSIGFF</b>  | 42.59 | 1.49 | <b>GWYKGSFAWQVIGRC</b>    | 76.42  | 2.46 | <b>DFQRWKGAFWVWNIHGA</b>   | 124.94 | 4.76 |
| 17 | <b>GALCVYYSFMETHNT</b>   | 39.37 | 1.38 | <b>LPRHRSTLQVIGIRFF</b>  | 41.71 | 1.46 | <b>DFERLKGAFWVWFDWN</b>   | 74.18  | 2.38 | <b>DFQRWKGAFWVWFDWN</b>    | 122.98 | 4.69 |
| 18 | <b>VWRLLFPFNSRLLSA</b>   | 39.32 | 1.38 | <b>LPYHRDTKIAFFGGKF</b>  | 39.23 | 1.38 | <b>LPVNWKGAFWQLRQEA</b>   | 73.95  | 2.38 | <b>MPRHRDTEVWAVSKLG</b>    | 115.57 | 4.40 |
| 19 | <b>YEVVRWTHEIKVKGFR</b>  | 38.68 | 1.36 | <b>YEVNWTHEIKVKGQN</b>   | 37.41 | 1.31 | <b>AFVWMLCVWTEYNGA</b>    | 71.48  | 2.30 | <b>LDRHRDTEVWAVSKLG</b>    | 114.21 | 4.35 |
| 20 | <b>GALSETYSFIKGYHNT</b>  | 38.56 | 1.35 | <b>GALSETYSFIKEYHNT</b>  | 36.93 | 1.30 | <b>AKVEKACVWVSVKKG</b>    | 71.16  | 2.29 | <b>GWKFYLCVWGRINMLG</b>    | 114.00 | 4.34 |
| 21 | <b>GWVNWMTHEIKVKGQN</b>  | 38.54 | 1.35 | <b>LERHRMTGKLFIVYRF</b>  | 36.92 | 1.30 | <b>DFRRLKGAIFLSYIRF</b>   | 69.56  | 2.24 | <b>GWWEKLCVWGRINMLG</b>    | 111.04 | 4.23 |
| 22 | <b>GALSETSAFWQLRQPA</b>  | 38.30 | 1.34 | <b>LPRHRDTGFVYSIGAF</b>  | 36.41 | 1.28 | <b>GDRAYGWCLWVWFDWN</b>   | 69.34  | 2.23 | <b>AKVEKLCVWVWNIHDC</b>    | 110.05 | 4.19 |
| 23 | <b>LWRRLPDAFWQLRQPA</b>  | 37.84 | 1.33 | <b>LAFFRDTGIRDSIGRR</b>  | 36.08 | 1.27 | <b>GWYKATAFAYCNVAF</b>    | 69.18  | 2.22 | <b>GWVWYKCVWVWNIHGA</b>    | 109.99 | 4.19 |
| 24 | <b>AEPQIAGAFWQLRQPA</b>  | 37.66 | 1.32 | <b>LYRHVFTVALDAIGLF</b>  | 35.91 | 1.26 | <b>LWVYEGCAFWQLRQRA</b>   | 68.53  | 2.20 | <b>SEVRWKGAFWVAVSKLG</b>   | 108.73 | 4.14 |
| 25 | <b>FWRRLLAPFPIKEYHNV</b> | 37.15 | 1.30 | <b>MARHRVYAGLFDISGMR</b> | 33.87 | 1.19 | <b>LPTFRLEGILKSIYRF</b>   | 67.70  | 2.18 | <b>SERAKAKWCLWMTDFC</b>    | 107.37 | 4.09 |
| 26 | <b>GWVSETCSFIKEYHNT</b>  | 37.15 | 1.30 | <b>LPRHSDTGILSGILVF</b>  | 30.41 | 1.07 | <b>ERFARLCVWVSVKKG</b>    | 67.64  | 2.17 | <b>DFQRWAKWCLWMTDFDR</b>   | 107.27 | 4.09 |
| 27 | <b>GDWVWVWVHVKKLG</b>    | 37.13 | 1.30 | <b>LPGMRLTKLISYAGRF</b>  | 29.98 | 1.05 | <b>GWQYKGTALLDYIGRY</b>   | 67.25  | 2.16 | <b>GWWEKLCVWGRVWVWDC</b>   | 107.24 | 4.09 |
| 28 | <b>GACVWVWVHVKKLG</b>    | 37.13 | 1.30 | <b>LTRHRDTGTYQTLISLF</b> | 29.96 | 1.05 | <b>LVFHRRLGILFFIYRF</b>   | 67.25  | 2.16 | <b>GWWEKLCVWVSGIGRF</b>    | 104.88 | 4.00 |
| 29 | <b>AKVEKCGGLDSIGRF</b>   | 36.33 | 1.28 | <b>CPRHEDGYILRSYGRF</b>  | 29.23 | 1.03 | <b>GKTHRACVWVSVKKG</b>    | 66.35  | 2.13 | <b>GWQRWKGAFWQLRQPA</b>    | 104.73 | 3.99 |
| 30 | <b>GALSETYSFIKSIYGRF</b> | 36.04 | 1.27 | <b>FGSRRTTGILKSIGRM</b>  | 29.01 | 1.02 | <b>AYVNWNTGILAFIGRF</b>   | 64.57  | 2.08 | <b>AWDLLKAFWQLRQPG</b>     | 104.64 | 3.99 |
| 31 | <b>YELNWTYSFIKEYHNT</b>  | 35.29 | 1.24 | <b>LRRKRSTGKTDLSILRF</b> | 28.45 | 1.00 | <b>GWYKGTAFWQLTYTF</b>    | 62.00  | 1.99 | <b>REVHRDTEVWAVSKLG</b>    | 103.73 | 3.95 |
| 32 | <b>YEVQWTHEIKVKGQF</b>   | 33.34 | 1.17 | <b>LUVSDCTAIRRSIGRF</b>  | 28.42 | 1.00 | <b>VWRLLGTAFAWQDRQTF</b>  | 60.19  | 1.93 | <b>GWWEKLSAFWQVIGRC</b>    | 102.63 | 3.91 |
| 33 | <b>GWYKGRARVMSIGRK</b>   | 33.00 | 1.16 | <b>LGRRFDTLLLESILRM</b>  | 27.98 | 0.98 | <b>GWYKGDGILVLIYRF</b>    | 59.96  | 1.93 | <b>MPRHNWTLNDFDIFGRK</b>   | 99.66  | 3.80 |
| 34 | <b>GALSETYSFIRLNYGM</b>  | 31.33 | 1.10 | <b>DFRRLPGAFAWQLRQPA</b> | 27.94 | 0.98 | <b>YPRRNLGTILYATYRF</b>   | 59.07  | 1.90 | <b>AEVNWKGAFWDFIERK</b>    | 99.51  | 3.79 |
| 35 | <b>LALSETYSFIKEYHNT</b>  | 31.15 | 1.09 | <b>FPRHRDYGILDSIGFR</b>  | 27.49 | 0.96 | <b>LDRAYAKWCLWMEWRF</b>   | 59.03  | 1.90 | <b>AKVEKLCVWVWNIHGA</b>    | 98.99  | 3.77 |
| 36 | <b>CHCSILKEVSNRLKPA</b>  | 30.87 | 1.08 | <b>LLRHRDTVILLKIDRF</b>  | 26.64 | 0.93 | <b>MPRLRDFVIRFSIERY</b>   | 57.94  | 1.86 | <b>GWWEKLCVWVWVSKLG</b>    | 98.67  | 3.76 |
| 37 | <b>DFRRLPGAFAWVEYHNT</b> | 30.18 | 1.06 | <b>LFRHRDTKLLDSIGRK</b>  | 25.82 | 0.91 | <b>RVRHATYGIYICNVRF</b>   | 57.93  | 1.86 | <b>LPKFYAKWCLWCFCTCF</b>   | 98.42  | 3.75 |
| 38 | <b>YEVNWTHEIKVIGRF</b>   | 30.09 | 1.06 | <b>LPRHRTKTLILDSIGLF</b> | 25.53 | 0.90 | <b>GWVHRNFYQGLIFRF</b>    | 56.34  | 1.81 | <b>DFGRLLKGAFAWVMIERK</b>  | 97.15  | 3.70 |
| 39 | <b>VWRLLFPGARRGLPA</b>   | 29.95 | 1.05 | <b>LLRHRRTGILKSIYMM</b>  | 25.16 | 0.88 | <b>VWRLLDGFGLCSIGDC</b>   | 55.75  | 1.79 | <b>DFWEKLCVWVWVNIHMF</b>   | 96.06  | 3.66 |
| 40 | <b>PQIAMFCGRLNMHNG</b>   | 29.49 | 1.04 | <b>IMAHRRGGIYDSIGRF</b>  | 24.59 | 0.86 | <b>AKVEKLCVWVWVWVIGRF</b> | 55.33  | 1.78 | <b>SERHRDTEVWAVSKLG</b>    | 95.05  | 3.62 |
| 41 | <b>VWVYKGRARVMSAVAA</b>  | 29.24 | 1.03 | <b>LVRDKKTGILDQIRRK</b>  | 24.59 | 0.86 | <b>YDRAYAKWCFWVWFDWN</b>  | 55.21  | 1.77 | <b>VWWEKLCVWVWVWVSHM</b>   | 92.78  | 3.53 |
| 42 | <b>LPRHRDTGIVWNIHGA</b>  | 29.08 | 1.02 | <b>SERHRDTGILFTILRQ</b>  | 24.29 | 0.85 | <b>LVKHRLRGLFISYIRF</b>   | 55.18  | 1.77 | <b>MPRHRTYGIYVNVRF</b>     | 92.76  | 3.53 |
| 43 | <b>AEPQIAMFLLDSIGRF</b>  | 28.94 | 1.02 | <b>LPRFTSTGFCCKSNGKL</b> | 23.84 | 0.84 | <b>DFRRLKVEVHQLRQPA</b>   | 54.97  | 1.77 | <b>MVWVWKGAFWDFIERK</b>    | 91.49  | 3.49 |
| 44 | <b>GWYKPGAFAWQLRQPA</b>  | 28.54 | 1.00 | <b>LPEHRVTLILDKVFRLL</b> | 23.55 | 0.83 | <b>LGVEKLCFAWQLRQPA</b>   | 54.93  | 1.77 | <b>DFRHRDTEVWAVSKLG</b>    | 90.75  | 3.46 |
| 45 | <b>AALSETYSFIKEYHNT</b>  | 28.14 | 0.99 | <b>KYSTRTDKILDRSGFF</b>  | 23.00 | 0.81 | <b>LVRHRLFGFLCSIGDC</b>   | 53.70  | 1.73 | <b>AEVNWKGACVWVWMTDF</b>   | 89.56  | 3.41 |
| 46 | <b>GACVWVWVHVKKLG</b>    | 27.85 | 0.98 | <b>LPYHSQTGVLFKICQK</b>  | 22.77 | 0.80 | <b>AKVFKLCFAWQLRQPF</b>   | 53.52  | 1.72 | <b>DWFLKLCVWGRINLHSM</b>   | 88.49  | 3.37 |
| 47 | <b>ASDWLPGAFAWQLRQPA</b> | 27.64 | 0.97 | <b>LQRHRSCGILYSIGQM</b>  | 22.71 | 0.80 | <b>GWVYMTGTGILFISIMRF</b> | 53.29  | 1.71 | <b>GWWEKLCVWVWVWVWVNIH</b> | 87.41  | 3.33 |
| 48 | <b>YFRRLPCAFAWQLRQPA</b> | 27.50 | 0.97 | <b>LPRHRRESGIQTLITRF</b> | 22.19 | 0.78 | <b>YPRHYAKWCLWVWVWDE</b>  | 52.49  | 1.69 | <b>LDRAGAKWCLWVWMTDF</b>   | 86.89  | 3.31 |
| 49 | <b>PQIAMFCGRLNMHNA</b>   | 27.30 | 0.96 | <b>NPCHRDGLLDTFGR</b>    | 20.93 | 0.73 | <b>YPRHRTYGIYICNVRF</b>   | 52.45  | 1.69 | <b>GGWLLKAFWQLRQPG</b>     | 86.53  | 3.30 |
| 50 | <b>ASCSILKEVWVHVKKRG</b> | 27.23 | 0.96 | <b>DVPRRDYDGLLVQIGRF</b> | 20.42 | 0.72 | <b>ARFACRFYILDVINRC</b>   | 51.21  | 1.65 | <b>GEVWVWKGAFWQLRWDN</b>   | 86.20  | 3.28 |
| 51 | <b>PQIAMFCGRLRQPD</b>    | 27.19 | 0.95 | <b>LEQRDQGLDSIRRS</b>    | 20.25 | 0.71 | <b>AKRRLTGAFWQSIGRF</b>   | 50.23  | 1.61 | <b>SEVRWKGAFWQLKLG</b>     | 86.16  | 3.28 |
| 52 | <b>GAKILKEVWVHVKKLG</b>  | 26.94 | 0.95 | <b>LPRHSEMGILSISYGRY</b> | 20.24 | 0.71 | <b>SALSETYSFINRLMHM</b>   | 49.84  | 1.60 | <b>DFQRWKGAFWQLQPA</b>     | 85.88  | 3.27 |
| 53 | <b>AEPQIAMFLLDSIGRF</b>  | 26.76 | 0.94 | <b>LFRHGDGTGISDSKGRF</b> | 20.21 | 0.71 | <b>DPRHRQFVQGYIFRF</b>    | 49.06  | 1.58 | <b>VWRLLKELWVHVKKLG</b>    | 85.77  | 3.27 |
| 54 | <b>GALSETYSFIKEYHNT</b>  | 26.53 | 0.93 | <b>MPRHRDTGNLNLILRS</b>  | 20.06 | 0.70 | <b>GWVYNGTAFWQLRQGG</b>   | 47.54  | 1.53 | <b>MPRHRDTEVWAVSKLG</b>    | 84.49  | 3.22 |
| 55 | <b>YEVNWTHEIKVKGPA</b>   | 25.96 | 0.91 | <b>LPRHRDTGILDSIGRF</b>  | 19.82 | 0.70 | <b>MPRHRDTGYLVSIYGRF</b>  | 47.29  | 1.52 | <b>GWWEKAVVWVSVKKG</b>     | 84.28  | 3.21 |

|     |                    |       |      |                   |       |      |                      |       |      |                     |       |      |
|-----|--------------------|-------|------|-------------------|-------|------|----------------------|-------|------|---------------------|-------|------|
| 56  | DFRRLPGAFAWVSAVAA  | 25.53 | 0.90 | LPRQARTTIEDSIRYF  | 19.69 | 0.69 | DWYKGTARAWNIHGA      | 47.26 | 1.52 | SWEKLCVWGRNLNMHM    | 83.93 | 3.20 |
| 57  | AKVEKLCVWNNKTVHF   | 25.27 | 0.89 | LLRRRDFAILQSIQCF  | 19.56 | 0.69 | YPRHRTYGIYYCNVRF     | 47.07 | 1.51 | DWFLKLCVWWSRKYLA    | 82.94 | 3.16 |
| 58  | YEKNWKTHEIKVKLYK   | 24.95 | 0.88 | LPEHTDTYIFNSIGNR  | 19.48 | 0.68 | AKVEKCAFVQVRFVRF     | 46.77 | 1.50 | LPVEKLTAFWGSIGRF    | 82.74 | 3.15 |
| 59  | AKVEKLCVWNNKISGRF  | 24.79 | 0.87 | LPLVRFDFGLVDSIQRF | 19.39 | 0.68 | GWRLLEKELCHVKKLG     | 46.46 | 1.49 | AKVFKECVWGRNLNMHM   | 82.09 | 3.13 |
| 60  | PQIFMLCVWNNKTPHA   | 24.78 | 0.87 | LKRHRDTAILMSKCRF  | 19.03 | 0.67 | PQIAMFCAFWQQLLPA     | 45.94 | 1.48 | LDRKLCVWVWNNQHGA    | 81.87 | 3.12 |
| 61  | HHCSIRKVTWVHVKKLA  | 24.75 | 0.87 | LPRHRDCKVDRIGRL   | 19.01 | 0.67 | GRTHRATRILFISIERY    | 45.92 | 1.48 | AFVEKLGAFWGSIGRF    | 81.04 | 3.09 |
| 62  | VWRLMPGAFAWQLRQPA  | 24.70 | 0.87 | LMGFRDTGILLSIMEV  | 18.01 | 0.63 | GWHRSTLCOYGRIFRF     | 45.73 | 1.47 | GWVEKLCVWNAVSTLG    | 80.88 | 3.08 |
| 63  | EWVWYDEMLTWNHIGA   | 23.76 | 0.83 | LKRHKDQGLRAIGMF   | 17.09 | 0.60 | PQMRKLGAFWQSIGRF     | 45.28 | 1.46 | AEVNWKGAFWDFIERK    | 80.79 | 3.08 |
| 64  | DFRRLPGAFAWQLRQPA  | 23.49 | 0.82 | LPRHDDTVFLDSTRFF  | 17.07 | 0.60 | YPRHRTYGIYYCNVRF     | 45.10 | 1.45 | LDRAYFKWCLWMTFMG    | 80.32 | 3.06 |
| 65  | VWRLLPAPPFNRLLSA   | 23.45 | 0.82 | LPAVRDVTILNSKGRF  | 16.98 | 0.60 | DPMQRGTGILAFIGRF     | 44.81 | 1.44 | AEVNWKGAFWVSKLKG    | 79.88 | 3.04 |
| 66  | DFRRLPGAFAWQLRQPA  | 22.94 | 0.81 | LQLERDGGQLLSIGRF  | 16.81 | 0.59 | LVHRRLGILKLSIFRF     | 44.02 | 1.42 | LPEFYTTGFLCRYKLG    | 79.22 | 3.02 |
| 67  | ASDWRDTGILLSIGRF   | 22.92 | 0.80 | LSRHGNAGILDSIGKF  | 16.45 | 0.58 | LPMQRGDGILFSIYRF     | 43.76 | 1.41 | KKMFYTTGFLGSIKLG    | 78.60 | 2.99 |
| 68  | VPRHRDTGILLSIGRF   | 22.92 | 0.80 | ADPHRDTDLIDYCYFF  | 14.98 | 0.53 | YKSEKCAFWQLRQPA      | 43.30 | 1.39 | KKFFYTTGFLGNSHGA    | 77.83 | 2.97 |
| 69  | GKWKYGRARFPLNMHM   | 22.70 | 0.80 | KTRARDTSLDCIGYF   | 14.90 | 0.52 | LVHRRLGILDIYGRY      | 43.29 | 1.39 | TMNKAWTLNDFDIFGRF   | 76.98 | 2.93 |
| 70  | GKRLKCTWINDGPHA    | 22.49 | 0.79 | LPRRRDTGSLDNRGRM  | 14.89 | 0.52 | TEVNWKGAFWELRQPA     | 42.56 | 1.37 | KKFFYTTGFLGSIQPA    | 76.75 | 2.92 |
| 71  | DFRRNPYSFIKEYHNT   | 22.45 | 0.79 | LPEHSDGGIVFSFERM  | 14.88 | 0.52 | KLRVDATRLLDYIGRY     | 42.44 | 1.36 | GWVEKLSVWVKLNQEA    | 76.43 | 2.91 |
| 72  | LPRHRDTCGLNMHMNS   | 22.40 | 0.79 | LPRRRFDVTCDSIGRF  | 14.74 | 0.52 | PQVEKCAFWQLRQPA      | 42.26 | 1.36 | AKQRKAAFWLLRQPA     | 75.28 | 2.87 |
| 73  | GWYKAPFPNRLLLPG    | 22.30 | 0.78 | LPLHMDFGQLTSLGRF  | 14.05 | 0.49 | YPRHRTYGIWQLYHNT     | 42.21 | 1.36 | LWRLLEKLVWGRLSMHM   | 74.77 | 2.85 |
| 74  | YEVNWKTHRLNMHMNV   | 22.29 | 0.78 | LTRHRQEGILVSDIDL  | 13.80 | 0.48 | LPRLYDFVILFISIERF    | 42.07 | 1.35 | KKFFYTTGFLRENHMG    | 73.87 | 2.81 |
| 75  | VHCIDILKEVWVHVKKLC | 22.14 | 0.78 | RVRHFDTGILQSIERL  | 13.72 | 0.48 | GAMQRYTGIIGFSIYRF    | 42.06 | 1.35 | TINKAWTLNDFDIFGRK   | 73.28 | 2.79 |
| 76  | PQIALFCGRNLVHIGA   | 22.01 | 0.77 | LERHRDTAILLSIGCF  | 13.66 | 0.48 | DPMQRGTGILFSIYRF     | 41.92 | 1.35 | MPRHRDTEFWAVSKLG    | 72.24 | 2.75 |
| 77  | HHCSILKSFIEEYVNT   | 21.85 | 0.77 | LPRHKVTRNLDSNGRG  | 13.58 | 0.48 | LPRHDYTMILLTYFRF     | 41.92 | 1.35 | MPRHRLGAFWGSIGRF    | 70.47 | 2.68 |
| 78  | KWYKGRARFVSAVAA    | 21.70 | 0.76 | RPGAGDTGIDKIGRF   | 13.40 | 0.47 | AKVTKLCAFWQLRQPA     | 41.77 | 1.34 | LDRAKLCLWVWVSKLKG   | 70.42 | 2.68 |
| 79  | AKVEKLEMLTWNHIGA   | 21.64 | 0.76 | EPHRHDFAILDVICAF  | 13.30 | 0.47 | AEVNWCGLIYQIGRF      | 41.14 | 1.32 | GWWHRTYGIYYVNVLR    | 70.21 | 2.67 |
| 80  | LPRHRAMFCGRNLVHMH  | 21.46 | 0.75 | LPLHRDVGILLYNGSF  | 12.78 | 0.45 | AEVWKFMIILFSIERY     | 41.11 | 1.32 | VWRLLEKELGRLNMKM    | 69.95 | 2.66 |
| 81  | LPRSEYYSFIKEYHNT   | 21.45 | 0.75 | LPHDHTGILLYYGRE   | 12.75 | 0.45 | MPRHRDTGYLVSLIRF     | 41.01 | 1.32 | VWRLLEKELWVSKLKG    | 69.61 | 2.65 |
| 82  | AEPQIAMFCGRNLNMF   | 21.32 | 0.75 | NPRVRDTGLSSIGLCL  | 12.68 | 0.45 | YPRHRTYGIYYCNVAF     | 40.98 | 1.32 | DFQSWKGAFAWQLRQCF   | 69.19 | 2.64 |
| 83  | DFRRGPEAFWQLRPHA   | 21.19 | 0.74 | LPGHRETGILMCMNRK  | 12.51 | 0.44 | LTRENLTGNLCFTYQF     | 40.71 | 1.31 | MPRRLKQAFWVWVWVND   | 68.87 | 2.62 |
| 84  | QFCRLPGAFAWQLTPHA  | 20.86 | 0.73 | SNRKRFTGINDSIGSF  | 12.49 | 0.44 | LRVACRTGILAFIYGRF    | 40.60 | 1.31 | LPEFYTKGAFAWQLRQPA  | 68.73 | 2.62 |
| 85  | SPRHRDTGILLSIGRF   | 20.77 | 0.73 | LPRHRFTGNLSDSLRF  | 12.40 | 0.44 | EPHRHDTGYLVSLIRF     | 40.18 | 1.29 | MPSHRDCQWVWNIHGA    | 68.63 | 2.61 |
| 86  | LPRHRDTGILLSIGRF   | 20.76 | 0.73 | PQIAMFCGRNLNMHMNV | 12.29 | 0.43 | LVHRRLGILKLSIFRC     | 39.55 | 1.27 | LDRAYAKWCLRLNLMH    | 67.83 | 2.58 |
| 87  | DFRRWKTHERKVKQGN   | 20.46 | 0.72 | LQSRHDTGILASERYF  | 12.22 | 0.43 | LVRRLKRAFVQSIGRF     | 39.51 | 1.27 | GWYKGSFAWQVIGRF     | 67.79 | 2.58 |
| 88  | GALSETYSFIKVKKLG   | 20.39 | 0.72 | LYRHLQDQINDSIGRK  | 12.09 | 0.42 | LTRMYATLILYSIGRF     | 38.46 | 1.24 | GWYAYAKWCLWMTDF     | 67.77 | 2.58 |
| 89  | ASDRLPRVFWQLRQPA   | 20.38 | 0.72 | LNRMRDLGCLBGRNS   | 12.00 | 0.42 | LKRAYAKVILFSIYRF     | 38.37 | 1.23 | LPRYTYTGLCVSKLKG    | 67.57 | 2.57 |
| 90  | RKVEKLCVWNNKISGRF  | 20.28 | 0.71 | LPRRRMDGLSDSIRVA  | 11.82 | 0.41 | LRFACTYILLDVIGRG     | 38.37 | 1.23 | VKVEKLCVWVWVSKLKG   | 66.76 | 2.54 |
| 91  | GYWYKGRARFVLAVA    | 20.15 | 0.71 | VPRHRQFVILDSQGNF  | 11.80 | 0.41 | LYGHRATLNPAFIFGRF    | 38.36 | 1.23 | VWRLLEKELWVAVSKLKG  | 66.64 | 2.54 |
| 92  | YHCSILKEVWVHVKKLT  | 19.97 | 0.70 | LPRHRVTGNTNICRF   | 11.46 | 0.40 | GWYKQATARPVNIFRF     | 38.02 | 1.22 | AEVEKACVWVWVSKLKG   | 66.44 | 2.53 |
| 93  | GALSEVYSFIKEKGSN   | 19.97 | 0.70 | LPRHRMTGYDYSIGRM  | 10.86 | 0.38 | DFRRTPKLFWWEYVNA     | 37.86 | 1.22 | GWYKGSFAWQVSKLKG    | 66.10 | 2.52 |
| 94  | LPRHRDTGILLSIGRF   | 19.72 | 0.69 | FSSRSDSKLDSIGRF   | 10.52 | 0.37 | PQIAFAFAFTQLIYRQ     | 37.57 | 1.21 | LFPVNWKGAFPLCSIKLG  | 66.07 | 2.52 |
| 95  | AERHRTDILDSIGRF    | 19.30 | 0.68 | LPGRAADILDSYGRF   | 10.40 | 0.37 | DFRRLKTLIYDSIGRF     | 36.39 | 1.17 | AKVEKLCVWVWVSKLKG   | 65.25 | 2.49 |
| 96  | GALSETYSFIQLRQPA   | 19.06 | 0.67 | VPVHYDTGILDFITRM  | 10.24 | 0.36 | RLRVDRFFILKLSIFRF    | 35.34 | 1.14 | LFPVNWKCVWVWVSKLKG  | 64.27 | 2.45 |
| 97  | DFRQIAMFCGRNLNMF   | 18.82 | 0.66 | GRMHRDTGIMDVIGRF  | 10.23 | 0.36 | DFRRLLEKELVLCMF      | 35.23 | 1.13 | RKVRTYGIYYVNVVRF    | 63.77 | 2.43 |
| 98  | DFRRLPEAFWQLRQPO   | 18.71 | 0.66 | LPOHRDTGILQSTARR  | 10.16 | 0.36 | GKTHRATRVQGLIFRF     | 34.85 | 1.12 | VWRLLEKELWVQLRGRF   | 63.63 | 2.42 |
| 99  | LPRHRDTGILFNNHMNV  | 18.51 | 0.65 | QPRHYVTCICDSIGRF  | 10.15 | 0.36 | LVHRRLGILKLSIFRQ     | 34.79 | 1.12 | GSWYKGSFAWQVIGRC    | 63.39 | 2.42 |
| 100 | DFREKYSFIKEKHNT    | 18.27 | 0.64 | LPRLFDTGDLVEIGTF  | 9.86  | 0.35 | LPTHGYTILLTYGRF      | 34.07 | 1.10 | VWRLLEKELWVAVSKLKG  | 62.98 | 2.40 |
| 101 | DQAMAMFCGRNLNMHMNV | 18.17 | 0.64 | LPRARDMGITKSDSRF  | 9.80  | 0.34 | RWRHDTMILLTYGRF      | 33.89 | 1.09 | LPEFYTKGFLGALNMHM   | 62.52 | 2.38 |
| 102 | DFRRWKTHERKVKQGN   | 18.17 | 0.64 | RPRTLDTGGLVDSIGVF | 9.37  | 0.33 | DPMQRGTGILFNIYRF     | 33.64 | 1.08 | VWRLLEKELWVLEWVND   | 61.86 | 2.36 |
| 103 | DFTRLPGAFAWQLRQPM  | 17.19 | 0.60 | LNFHRDSEQLDSIFGRF | 9.25  | 0.32 | VWRHRATLNPFICIGRK    | 33.30 | 1.07 | KKFFYTKGFLWMTDF     | 61.35 | 2.34 |
| 104 | HHCSIAKEVWVQLRQPA  | 16.55 | 0.58 | LPRHRDTMFLDSIMSF  | 8.89  | 0.31 | DTRRLKTLIYDSIYRF     | 33.13 | 1.06 | LFPVNWLCVWVWVSKLKG  | 61.28 | 2.33 |
| 105 | PQIAMFCGRNLNKAHPH  | 16.37 | 0.57 | LSRHMTVGLDSIGRF   | 8.69  | 0.30 | LPTFYTYTILLDVIGRR    | 33.09 | 1.06 | GWNEKLCVWGRNLNMHM   | 60.51 | 2.31 |
| 106 | HHCHRDTGILLSIGRF   | 16.35 | 0.57 | LPRVRDQGILESFGMR  | 8.23  | 0.29 | GALHYDTGYLVSYGRF     | 32.54 | 1.05 | EDRAYAKWCLWMTDF     | 59.81 | 2.28 |
| 107 | VWRLLPAPPFNKTPVA   | 16.29 | 0.57 | VPCHRDTYILDKIRSD  | 8.18  | 0.29 | DFTHRATVLLDIYGRY     | 32.46 | 1.04 | AKVEKACVWVWVSKLKG   | 59.67 | 2.27 |
| 108 | HHCSILKEVWVHVKKNV  | 16.25 | 0.57 | VDCQSDTDFGLDSIGRF | 8.17  | 0.29 | DFTHRATVLLDIYHNE     | 31.95 | 1.03 | LDRAYAGIYYVNVVRF    | 59.03 | 2.25 |
| 109 | DFRQIAMFCGRNLNMF   | 16.13 | 0.57 | LPHRATRLDMIERA    | 8.16  | 0.29 | GKRHDYTMILLTYGRF     | 31.79 | 1.02 | MPRHRDTEIYYVNVVRF   | 58.51 | 2.23 |
| 110 | ASDWDYDEMLTWNHIGS  | 16.12 | 0.57 | LPRMRDTFIRDSIGKQ  | 8.11  | 0.28 | LWYQGRAPVPSAPHF      | 31.45 | 1.01 | LDRAYAKWCLWVVRQPA   | 58.02 | 2.21 |
| 111 | LPRHMFCEGLNMHMNV   | 15.90 | 0.56 | LDMHRDYGILSDSIVRF | 7.90  | 0.28 | GWYKQATARVQLRQPA     | 31.44 | 1.01 | DEVNWKGAFWVDFIERK   | 56.96 | 2.17 |
| 112 | PQIAMFCGRNLNMHMNV  | 15.78 | 0.55 | AEPQIAMFCGRNLNMHM | 7.69  | 0.27 | YALSETYSFINRLLPF     | 31.38 | 1.01 | EKFLKLCVWVWVSKLKG   | 56.69 | 2.16 |
| 113 | DFDRIAMFCGRNLNMHM  | 15.66 | 0.55 | LPGHADDKIGCSIGRF  | 7.67  | 0.27 | LPRLDYFVWDFIIGRF     | 30.71 | 0.99 | TINKAWTLWVWVSKLKG   | 56.68 | 2.16 |
| 114 | APRHRDTGILLSIGLFL  | 15.53 | 0.55 | VPGEDTALSSKGRF    | 7.50  | 0.26 | YPRHRTYGFILCAIGDC    | 30.53 | 0.98 | KKFFYTTLNDFDIFGRK   | 55.92 | 2.13 |
| 115 | HHCSILNEVWVHVKKHM  | 15.06 | 0.53 | LPRHMTNALDAIGRF   | 7.26  | 0.25 | DPRLRSTLIQYGRIFRF    | 30.15 | 0.97 | AFVMDLCVWVWNIHGA    | 55.87 | 2.13 |
| 116 | ASDWDYDEMLTWNHIGA  | 15.04 | 0.53 | CMRHRDTGILMSVRL   | 7.24  | 0.25 | LPRQVDTGILVVIYGRF    | 29.94 | 0.96 | VWRLLEKELWVQVVKLKG  | 55.06 | 2.10 |
| 117 | HMDSTNKEGVPVVKLGL  | 14.88 | 0.52 | LPRRRDTLVLSRGA    | 7.17  | 0.25 | DPMQRGTGILYSIGRF     | 29.17 | 0.94 | DKFLKLCVWVQLRWDN    | 54.31 | 2.07 |
| 118 | LGRHRDTGILVHVKKLG  | 14.68 | 0.52 | LSRQADTALCSIGRL   | 7.08  | 0.25 | LWYQGRAPVPSAPRC      | 29.04 | 0.93 | MPSRSDTEVWVAVSKLKG  | 54.24 | 2.07 |
| 119 | ASDWDYDCGRNLNMHMNQ | 14.64 | 0.51 | LPRHRDTMMLDLIARL  | 7.01  | 0.25 | LSYHRATLNDFMIFRF     | 28.70 | 0.92 | GKWHRTYGIYYNIHFA    | 53.86 | 2.05 |
| 120 | PQIACFCGRNLNMHMHM  | 14.35 | 0.50 | LPRHRDRGKLDYIGEF  | 6.88  | 0.24 | LPRQVDTGILVVIYVRF    | 28.31 | 0.91 | KKFFEKGAFAWVWVND    | 53.67 | 2.04 |
| 121 | PFVCWKTHERKVKQGN   | 14.31 | 0.50 | LCRGRDEGIVDSAFRT  | 6.84  | 0.24 | LGRHRTYGIYYCNARF     | 28.30 | 0.91 | KKFFYTKGFLWVWVSKLKG | 53.26 | 2.03 |
| 122 | LLRRLPGAFAWQLRQPA  | 14.26 | 0.50 | MQRRLDTGILDSIGRE  | 6.78  | 0.24 | DFRDLPKAFWQLKKG      | 27.96 | 0.90 | LPEFYTTGFLCSRWVND   | 53.04 | 2.02 |
| 123 | YEVNWKTHERKVKQHA   | 14.12 | 0.50 | LMRHRDGGYILDERGRN | 6.61  | 0.23 | LSYHRATLNDFDIFIGA    | 27.91 | 0.90 | DEQRKGAFAWQLRQPA    | 52.90 | 2.02 |
| 124 | EQIAMFCVWNNKTPHA   | 14.11 | 0.50 | TPLRHSTITLVDIGSF  | 6.26  | 0.22 | GWYKQATARLKSIFRF     | 27.67 | 0.89 | EKVEKTAFAWVDFIARK   | 52.47 | 2.00 |
| 125 | PQIAMFCERLNHMHMNV  | 13.77 | 0.48 | LPRNMTGYTDSFERF   | 6.25  | 0.22 | ELRVQDFILDGYGRF      | 27.61 | 0.89 | RWRLLEKELWVWVSKLKG  | 51.89 | 1.98 |
| 126 | YEVNWKTHERKVKQGN   | 12.94 | 0.45 | TPRHRDTGCLDSIGDRL | 6.23  | 0.22 | LVHRVTLGILKVKKLG     | 27.48 | 0.88 | DFRQAKGAFWVWVSKLKG  | 51.22 | 1.95 |
| 127 | ASDWRDTEILDSIGRF   | 12.81 | 0.45 | VNDHRDTGMAYVIGRG  | 5.46  | 0.19 | DPMQRGTGILFVIGRF     | 26.97 | 0.87 | EKVKKLGAFWGSIGDN    | 50.50 | 1.92 |
| 128 | AEPQIAMFIFKEYHNT   | 12.81 | 0.45 | LNRSDRTGILANMRQ   | 5.15  | 0.18 | LPRRLPKAFVQLYHNT     | 26.84 | 0.86 | GWYKGSFAWQVIGPT     | 50.17 | 1.91 |
| 129 | CQNRMSCVRLNMHMNV   | 12.78 | 0.45 | LRRHRETGFLDEAKQF  | 5.14  | 0.18 | FPRHRNFAFWQLRQPA     | 26.71 | 0.86 | VWVRLKLCVWVWNIHGA   | 50.12 | 1.91 |
| 130 | VWLSETPFSKEYHNT    | 12.71 | 0.45 | ACGHDDTGSLSISGRY  | 5.00  | 0.18 | GALRLLKEVWVWVWVSKLKG | 25.32 | 0.81 | DWFLKLCVWVWVSKLKG   | 49.76 | 1.90 |
| 131 | YPRHRDTGILLSIGRF   | 12.50 | 0.44 | LPTFRDFGDLDSIGSF  | 4.91  | 0.17 | YPRHRTYGIYVSTQSF     | 25.31 | 0.81 | EKVEKCCVWGRNLNMHM   | 49.17 | 1.87 |
| 132 | AEPQIDEMLTWNHIVA   | 12.34 | 0.43 | CPFECDRALDSIGRF   | 4.90  | 0.17 | MPMQRGTGILDSIYRF     | 24.42 | 0.79 | TEVNWKFASDYDFIAFK   | 49.01 | 1.87 |
| 133 | PQIAWKTHERKVKQGN   | 12.13 | 0.43 | RPRQDGTGILKLSICF  | 4.78  | 0.17 | GRTHRATRLDYIGGK      | 24.33 | 0.78 | DFQRLKELWVWVSKLKG   | 48.60 | 1.85 |
| 134 | DFRRQKDAFAWVQRQCA  | 11.41 | 0.40 | LMEVFDTGILDSIGRE  | 4.55  | 0.16 | GKTHRATGILVVIYTRQ    | 24.26 | 0.78 | VPEKACVWVWVSKLKG    | 46.96 | 1.79 |
| 135 | GTWYKGRARFVSAVAA   | 11.27 | 0.40 | GPRHGDGLKKSIGRV   | 4.45  | 0.16 | LVHRHAPKAFWQLYHNT    | 23.71 | 0.76 | GWVYKLCGRVNLNMHM    | 46.85 | 1.78 |
| 136 | LPRHRDCGRNLNMHMNV  | 11.16 | 0.39 | LPKHQGTGIVGSMGRM  | 4.45  | 0.16 | LTRRNDTGILVSIYGRS    | 23.51 | 0.76 | LPEFYTKGFLCSIKLKG   | 46.56 | 1.77 |
| 137 | CYVNLMTMHIKVKGFN   | 10.99 | 0.39 | FPRHKTGGLDYVVGKS  | 4.45  | 0.16 | YKRLLEKELWVWVSKLKG   | 23.43 | 0.75 | LDRAYAKWCLWVWVSKLKG | 46.27 | 1.76 |
| 138 | LPRHRDTGILNLMHM    | 10.77 | 0.38 | YPOKRDTEGDCSISRF  | 4.41  | 0.15 | LMRACRTYILLDVIGRC    | 23.15 | 0.74 | AKVEKLCVWVWVSKLKG   | 46.01 | 1.75 |
| 139 | ASDWDYDEMLTWNHILN  | 10.58 | 0.37 | KDRHRDVSILDSGGRL  | 4.37  | 0.15 | LPTFYTYTKGCLCSAPHA   | 22.84 | 0.73 | GWYKGSFLGCSIKLKG    | 45.82 | 1.75 |
| 140 | ASDWDYDEMLDWNHNV   | 10.50 | 0.37 | LPHNRDKVRAVSCGQF  | 4.23  | 0.15 | MPRHVDTRLDYIGRY      | 22.82 | 0.73 | CINKAWTLNDFDIFRQF   | 45.81 | 1.75 |
| 141 | LPRHR              |       |      |                   |       |      |                      |       |      |                     |       |      |

|     |                      |       |      |                      |       |      |                       |       |      |                       |        |      |
|-----|----------------------|-------|------|----------------------|-------|------|-----------------------|-------|------|-----------------------|--------|------|
| 152 | YFRRTPGASALCQPPA     | 8.45  | 0.30 | RPHFDTAGLDSTLRF      | 3.50  | 0.12 | LPRLRDFVILKSIGVF      | 18.19 | 0.58 | AWWHRTYGIYVNDRF       | 42.54  | 1.62 |
| 153 | GALWYDDMLTWNJAGA     | 8.42  | 0.30 | LPRCRDQCFLDSSGGF     | 3.47  | 0.12 | DFRRVLEKVVHVNRY       | 17.86 | 0.57 | DFQRWKGAFQRLRQPF      | 41.78  | 1.59 |
| 154 | GAKSETYSFKEAVVA      | 8.41  | 0.30 | LVDHSLTKKLDSECRF     | 3.31  | 0.12 | KKFTRDTGILRLRQRA      | 17.64 | 0.57 | TFQRWGLNDFDIQML       | 39.34  | 1.50 |
| 155 | AEPQTAMAFWQSRQPA     | 8.13  | 0.29 | TPRHRDTMSLDSYQYR     | 3.30  | 0.12 | GGYHRATLNFQRLLLPA     | 16.86 | 0.54 | ALVNTYKAFLOCFIRRK     | 39.25  | 1.50 |
| 156 | YSDWYDEMLTWNJIGA     | 7.91  | 0.28 | LARHLDTGILDKIERT     | 3.29  | 0.12 | LPRHDYTMILLTIERY      | 16.66 | 0.54 | GWYNKLCVWGRLNMA       | 39.14  | 1.49 |
| 157 | YEVNWPAGFTQLRQPA     | 7.89  | 0.28 | QPKHRDTGCLDQLGRT     | 3.28  | 0.11 | DFMQRGTLLIFMFDNM      | 16.46 | 0.53 | LQVWMAKAFQQLRQSA      | 38.74  | 1.48 |
| 158 | LPRHRDTGILLDNMHN     | 7.65  | 0.27 | LPRCLDTGMYSIGCF      | 3.21  | 0.11 | KDYVRKGAFWWDGYGRA     | 16.38 | 0.53 | DWFLAWTLNDDFIGRK      | 36.64  | 1.40 |
| 159 | AEPQMFQCGRLNMHMV     | 7.27  | 0.26 | YQRHDDGILDSICAF      | 3.15  | 0.11 | GWQYKGTACWQLRQRA      | 16.31 | 0.52 | EKVEKLGAFWVAVSLG      | 36.35  | 1.38 |
| 160 | SPRHRDTGILDSLLPA     | 7.23  | 0.25 | LGMERDTGGLDAGGRF     | 3.05  | 0.11 | KKFDRDTGILKSLIGL      | 16.23 | 0.52 | LDWEKLCVWRDNMGM       | 35.44  | 1.35 |
| 161 | DFRRLPTEHIEKVKQGN    | 6.47  | 0.23 | LPRGRATGALDENGKGF    | 3.04  | 0.11 | LTRRNLEKVVHVNKLG      | 15.97 | 0.51 | GWEEELTLNDFDIGRK      | 34.95  | 1.33 |
| 162 | LPRLSDTDIYTSGGGRF    | 6.38  | 0.22 | APRHFMTGNNDSEGRF     | 2.80  | 0.10 | LGRHRTYGVQYCNVRF      | 15.73 | 0.51 | LFVVKLCVWTSIGRFR      | 34.31  | 1.31 |
| 163 | MKVMKLCERNKTPPEA     | 6.21  | 0.22 | NGRCRCTEIDRDIGAF     | 2.78  | 0.10 | MPREKLCWFQQLRQPA      | 15.47 | 0.50 | GWWHRTYGIYVNDRF       | 33.97  | 1.29 |
| 164 | LPRHRDTGILDSIHGA     | 6.20  | 0.22 | LKEHRDTGRLDLDGAF     | 2.70  | 0.09 | LELRDFVILFSDIEDC      | 15.45 | 0.50 | MPRHRGSAFWQVSGIC      | 33.37  | 1.27 |
| 165 | DFRRNPGHEIKVKQGN     | 5.96  | 0.21 | LRRRMDQGNLDSIEFA     | 2.58  | 0.09 | DLRHRCNVQGLIKLG       | 15.39 | 0.49 | MPRLLKAFWRLRQPG       | 32.91  | 1.25 |
| 166 | PQIYKGRARFVSAVAM     | 5.95  | 0.21 | LPYHRDVGFDQTSRFR     | 2.53  | 0.09 | KLFRDRTGVLVSGGRF      | 15.10 | 0.49 | MPRHRDTVWARLNMMH      | 31.78  | 1.21 |
| 167 | PSKYDEMELWNIHGA      | 5.94  | 0.21 | GPREFDTGLLDSNRKN     | 2.52  | 0.09 | YPRHRGTGIVLIGMF       | 14.80 | 0.48 | YKVEKLCVWGRNMHM       | 31.67  | 1.21 |
| 168 | GWAERKRARFVSAVNC     | 5.93  | 0.21 | LPQHRDTEILFSEDFD     | 2.51  | 0.09 | LDVRDFPILDDGYGRT      | 14.59 | 0.47 | DFQHKLCVWGRLNMMH      | 31.51  | 1.20 |
| 169 | HFESILMEVREHEKELG    | 5.55  | 0.19 | LPRQKDTGIVDSMQRF     | 2.47  | 0.09 | LPRHDYTMILKTYGRF      | 14.11 | 0.45 | TINKAWTLNDFDIQML      | 31.41  | 1.20 |
| 170 | LPRHADTGIILDSIGLG    | 5.42  | 0.19 | LPRHTYDGINDTIGRM     | 2.25  | 0.08 | AKVEKLDFAFWQLRQPY     | 14.02 | 0.45 | VWRLLKAFWVAVSLG       | 30.51  | 1.16 |
| 171 | QFTRLPGAATATRCVA     | 5.31  | 0.19 | LPRHTMCNIMDSIGSF     | 2.15  | 0.08 | LTRRNLTGILSSYTRQ      | 13.35 | 0.43 | VKVLKLELWVSLKLG       | 30.49  | 1.16 |
| 172 | LKNHRDAGINDSIGRG     | 5.23  | 0.18 | LPRRRDTGILDSDDQQ     | 2.15  | 0.08 | LWQYQGRARTVFPAPA      | 13.28 | 0.43 | MPREKLCVWVRLNMMH      | 30.34  | 1.16 |
| 173 | YEPQIAMPFCGLNMHM     | 4.77  | 0.17 | VPRGRDAGILDSNGSF     | 2.14  | 0.07 | DFRRLPGAFAWQLRQPA     | 13.04 | 0.42 | VRRLLKAFWQLRQPG       | 29.72  | 1.13 |
| 174 | DDRRLPGAFAFKVSAVAA   | 4.62  | 0.16 | LTRARDGDMDSAGRFR     | 2.11  | 0.07 | DFKRLSGAFAQSKGRF      | 12.15 | 0.39 | GWKLEKLGWVSLCQV       | 27.73  | 1.05 |
| 175 | LPRHRDTGILDSIMNV     | 4.53  | 0.16 | LPQETDKQVLSIGQF      | 2.02  | 0.07 | YFQHMITYGIYVCRQPG     | 11.90 | 0.38 | LDRAYAKWCLWMLMFM      | 27.63  | 1.06 |
| 176 | LEPQIAMPFCGLNQMHM    | 3.88  | 0.14 | DRRHGDQGLMDMIGGF     | 1.96  | 0.07 | GFRRLGRARFVSAVHA      | 11.56 | 0.37 | EKVEKLGAFWGLNMMK      | 26.70  | 1.02 |
| 177 | LPIHRDTGILNMMHMV     | 3.80  | 0.13 | LCGVRDTGMNDSGGGF     | 1.91  | 0.07 | LPRHRSTLIQMTYSRFR     | 10.31 | 0.33 | NKVEALYGFGLSIGDC      | 26.01  | 0.99 |
| 178 | AEPLLAPFMNRLNLLPA    | 3.70  | 0.13 | LPFHEDTGIQDMITRFR    | 1.82  | 0.06 | LRFACGEARFVSAVPHA     | 10.02 | 0.32 | GEVNWGSAFQDFIERK      | 25.81  | 0.98 |
| 179 | LPRHKDTGILDSGDRF     | 3.59  | 0.13 | LPRHRDGEILLESIGNM    | 1.74  | 0.06 | DQRRLPTYILDVIGRC      | 9.92  | 0.32 | AEVNWKGAFAWDFNCEA     | 25.69  | 0.98 |
| 180 | GALSETYSFVPSAVAAA    | 2.93  | 0.10 | LPDLRRTGIDDSNGMF     | 1.73  | 0.06 | LPRHRSTLIQYGIPIHS     | 9.77  | 0.31 | DFLTYKSDSWQLRQYA      | 25.63  | 0.98 |
| 181 | AEPQDDMFQCGRLNMHM    | 2.78  | 0.10 | LDVRVDTGILDSRQGS     | 1.72  | 0.06 | KKFDRDTGILKSLIGQF     | 9.60  | 0.31 | SEVWRWGGFGLSIGDC      | 23.89  | 0.91 |
| 182 | ASDWKDTHEIKVRQGN     | 2.69  | 0.09 | DPDHDDTGYLDEIGRL     | 1.72  | 0.06 | RVRHADTFGLNLSIGRF     | 9.25  | 0.30 | AKVALLKELWVVKLGM      | 22.98  | 0.88 |
| 183 | HCESILKEVWVHVKKLG    | 2.54  | 0.09 | TSQHRDTGQRDDTGRF     | 1.67  | 0.06 | DFRRDDTGLDGYERF       | 9.24  | 0.30 | DCWYKGSADFQVIGRC      | 21.22  | 0.81 |
| 184 | HHSRRLKEVIDVKQGN     | 2.33  | 0.08 | LERHRDTGLADSIGYD     | 1.66  | 0.06 | LTRRNLTGIAYPWLTO      | 9.05  | 0.29 | MMRHRDTEVWVSKRFR      | 20.05  | 0.76 |
| 185 | AEPQIAMPFCGLNMHMND   | 2.26  | 0.08 | LPQRDTQIQDCKGQA      | 1.65  | 0.06 | AKVEALCAFSQLRQPA      | 8.97  | 0.29 | MPNKAMTLNDFDIGRK      | 16.63  | 0.63 |
| 186 | AERHRGTGICTSIGNQ     | 2.22  | 0.08 | NGCHRDTGILDLQGSV     | 1.58  | 0.06 | LLRVLDFNILDGYSRGM     | 8.92  | 0.29 | DFQRWKGAFWDLRQPG      | 15.41  | 0.59 |
| 187 | LPVHRDTGIEIKVKQGN    | 2.15  | 0.08 | LDQVRDKGSEDSINRFR    | 1.56  | 0.05 | YPDHRTAVWGLNMMHM      | 8.62  | 0.28 | TINKAWTNFVSKVGLG      | 14.22  | 0.54 |
| 188 | AEPFEIAMPFCGLNMHM    | 1.76  | 0.06 | LPTHRRDMGACSEMMF     | 1.44  | 0.05 | LPRLRATNFDVIGRKR      | 8.46  | 0.27 | AEVNWKGAFAWQLRQEA     | 11.41  | 0.43 |
| 189 | AEPQIGRARFVSAVAAA    | 1.74  | 0.06 | LPLRVDTTALVSMGDF     | 1.40  | 0.05 | LPRHRDTGILDSIGRFR     | 8.13  | 0.26 | AFVVKLCVMTWEYGNF      | 11.01  | 0.42 |
| 190 | LPRHRDTGILDSIGQGN    | 1.57  | 0.06 | LPRHRDCNEQDSIAEF     | 1.20  | 0.04 | LYGHRATLNWTEYVNA      | 8.05  | 0.26 | TFQKAWTLNQCILGAK      | 9.24   | 0.35 |
| 191 | GALSETYARFVSAVAT     | 1.54  | 0.05 | CPLHRDTRLEDSVRDT     | 1.16  | 0.04 | DFRHRDTGSLVSIIGRFR    | 7.73  | 0.25 | GWMEKMCVYSLTETM       | 9.17   | 0.35 |
| 192 | ASDWYDEMLTNRKILPA    | 1.50  | 0.05 | LPFDRDTGTLKDIGSD     | 1.08  | 0.04 | DFMQRGTGFNRLNLLPA     | 7.33  | 0.24 | TINHRATEVWVAVSLG      | 8.49   | 0.32 |
| 193 | PQIAMPFCGEFVSAVAAA   | 1.38  | 0.05 | LPKERNTGDLKSIIVDM    | 1.01  | 0.04 | GAKSETYARFVSAVHA      | 6.81  | 0.22 | AELQKGAFLDFVSRK       | 6.86   | 0.26 |
| 194 | LPRHRDTGILDSISQGN    | 1.29  | 0.05 | EPRHRDDMILESMTCF     | 0.93  | 0.03 | TINAAFDNWWRPWCEL      | 6.23  | 0.20 | MPNHRDTEVWQMRQPG      | 5.53   | 0.21 |
| 195 | PDKAMPFCGLNMNSCNV    | 0.96  | 0.03 | CPDRDCTGDLDSIDRM     | 0.91  | 0.03 | TPRHRDTGILQLRQPG      | 5.90  | 0.19 | DFERLKCCTRWTEYVNA     | 5.31   | 0.20 |
| 196 | PQDAMPFQNDLMAHKTV    | 0.68  | 0.02 | LPEHQDTGEKESINRM     | 0.71  | 0.02 | LPAQRDTGIAVVIYVPG     | 5.89  | 0.19 | MPRHGLCVGGAVSKLGM     | 5.09   | 0.19 |
| 197 |                      |       |      |                      |       |      | AAANAMWMDWYVPMMK      | 4.01  | 0.13 | MPRHRDTEVWVVKQLG      | 2.27   | 0.09 |
| 198 |                      |       |      |                      |       |      | LQRHAKTEELYLIGRM      | 2.69  | 0.09 | MPRHRDTEVGRNLMHM      | 1.92   | 0.07 |
| 199 |                      |       |      |                      |       |      | MPRHRDKGMDVSVGES      | 1.41  | 0.05 | MPVHRDTELMNVKVLGM     | 1.63   | 0.06 |
| 200 |                      |       |      |                      |       |      | LPRQDDTGFLCSIGDC      | 0.73  | 0.02 | MPRYRDTTEVWVAVSGDC    | 0.11   | 0.00 |
|     | <b>Lead Peptides</b> |       |      | <b>Lead Peptides</b> |       |      | <b>Lead from Gen1</b> |       |      | <b>Lead from Gen2</b> |        |      |
|     | HHSRRLKEVWVHVKKLG    | 31.19 | 1.09 | YEVNWKTHEIKVKQGN     | 34.56 | 1.21 | YPRHRTYGIYVNDRF       | 71.89 | 2.31 | GWWEKLCVWGRLNMMH      | 171.88 | 6.55 |
|     | PQIAMPFCGLNMHMNV     | 29.09 | 1.02 | GALSETYSFKEYHNT      | 33.69 | 1.18 | DFMQRGTGILFYSYRFR     | 67.81 | 2.18 | AKVEKLCVWVWNIHGA      | 101.63 | 3.87 |
|     | DFRRLPGAFAWQLRQPA    | 24.00 | 0.84 | GWYKGRARFVSAVAAA     | 33.13 | 1.16 | LVRHRDLGILKSIERFR     | 64.09 | 2.06 | EKVEKLGAFWDLRQPG      | 96.78  | 3.69 |
|     | GWYKGRARFVSAVAAA     | 23.14 | 0.81 | DFRRLPGAFAWQLRQPA    | 27.23 | 0.96 | MPRHRDTGVLVSIIGRFR    | 63.98 | 2.06 | LDRAYAKWCLWMLMFM      | 94.03  | 3.58 |
|     | YEVNWKTHEIKVKQGN     | 21.60 | 0.76 | HHSRRLKEVWVHVKKLG    | 25.91 | 0.91 | LYGHRATLNDFDIGRK      | 63.02 | 2.03 | SEVWRWGGFGLSIRK       | 89.86  | 3.42 |
|     | LPRHRDTGILDSIGRFR    | 19.28 | 0.68 | VWRLLAPFVPSNRLNLLPA  | 23.53 | 0.83 | GWYKGTAFWQLRQPG       | 61.99 | 1.99 | TINKAWTLNDFDIGRK      | 81.48  | 3.10 |
|     | AEPQIAMPFCGLNMHM     | 19.21 | 0.67 | AKVEKLCVWVWNIHGA     | 19.84 | 0.70 | DFRRLKGAFAWQSIIGRFR   | 59.08 | 1.90 | DFQRWKGAFWDLRQPA      | 81.27  | 3.10 |
|     | AKVEKLCVWVWNIHGA     | 18.21 | 0.63 | LPRHRDTGILDSIGRFR    | 19.81 | 0.70 | AEVNWKGAFAWQLRQPA     | 55.82 | 1.79 | DWFLKLCVWVAVSLKLG     | 81.17  | 3.09 |
|     | GALSETYSFKEYHNT      | 15.06 | 0.53 | ASDWYDEMLTWNJIGA     | 15.10 | 0.53 | GKTHRATRLDLYIGRY      | 54.91 | 1.77 | MPRHRDTEVWVAVSKLGM    | 80.08  | 3.05 |
|     | ASDWYDEMLTWNJIGA     | 14.96 | 0.53 | PQIAMPFCGLNMHMNV     | 11.55 | 0.41 | LPTFYTYGFLCSIGDC      | 54.70 | 1.76 | KKFFYYTGFGLSIGDC      | 77.72  | 2.96 |
|     | VWRLLAPFVPSNRLNLLPA  | 9.85  | 0.35 | AEPQIAMPFCGLNMHM     | 7.44  | 0.26 | VWRLLKELWVVKLGM       | 54.15 | 1.74 | GDRAYKWCLWMLMFM       | 76.78  | 2.93 |
|     |                      |       |      |                      |       |      | LPRLRDFVILFISERY      | 53.94 | 1.73 | VWRLLKAFWQLRQPG       | 74.88  | 2.85 |
|     |                      |       |      |                      |       |      | LRFACRTYILDVIGRC      | 53.68 | 1.73 | GWWHRTYGIYVNDRF       | 72.14  | 2.75 |
|     |                      |       |      |                      |       |      | AKVEKLCVWVWVVKLGM     | 52.95 | 1.70 | AEVNWKGAFAWDFIERK     | 72.08  | 2.75 |
|     |                      |       |      |                      |       |      | LPRQRDTGILVVIYRQ      | 51.40 | 1.65 | DFERLKGAFWMLMFM       | 71.37  | 2.72 |
|     |                      |       |      |                      |       |      | PQIAMPFCFAWQLRQPA     | 51.37 | 1.65 | VWRLLKELWVVKLGM       | 67.24  | 2.56 |
|     |                      |       |      |                      |       |      | LPRHDYTMILLTYGRFR     | 50.36 | 1.62 | LKPFYTYGFLCSIKLG      | 67.17  | 2.56 |
|     |                      |       |      |                      |       |      | AKVEKLCFAWQLRQPA      | 50.26 | 1.62 | LPVNWKGAFAWQLRQEA     | 66.30  | 2.53 |
|     |                      |       |      |                      |       |      | DFRRLKELWVWVVKLGM     | 48.30 | 1.55 | AKVEKLCVWVWVVKLGM     | 65.15  | 2.48 |
|     |                      |       |      |                      |       |      | GWYKGTGILVLIIGMF      | 47.66 | 1.53 | DFRRLKGAFAWQSIYRFR    | 64.85  | 2.47 |
|     |                      |       |      |                      |       |      | LPRVKNYTGILAFIIGRFR   | 46.91 | 1.51 | GWYKGSFAWQVIGRC       | 54.79  | 2.09 |
|     |                      |       |      |                      |       |      | LTRRNLTGILSSYTRFR     | 46.19 | 1.48 | AFVVKLCVMTWEYVNA      | 53.52  | 2.04 |
|     |                      |       |      |                      |       |      | GWYKGTAFVWNIHGA       | 45.44 | 1.46 |                       |        |      |

|    | Generation 3b      | x      | c     | Generation 4      | x      | c     | Generation 5      | x      | c     | Generation6       | x      | c     |
|----|--------------------|--------|-------|-------------------|--------|-------|-------------------|--------|-------|-------------------|--------|-------|
| 1  | GWWEKLCVWGRLNMMHG  | 341.01 | 12.99 | GWWEKLFNWGRQNPQA  | 357.46 | 20.95 | GWWEKLFNWGRQNPQA  | 290.53 | 23.02 | GWWEKLFNWGRQDQPK  | 103.90 | 26.88 |
| 2  | GWFEKLCVWGRLNMMH   | 313.01 | 11.93 | GWWEKLCGFVNFCEK   | 175.29 | 10.27 | GWWEKLFNWGRQNGHG  | 263.61 | 20.88 | GWWEKLFNLGCGQNPQA | 99.93  | 25.86 |
| 3  | GWWEKLCVWGRLNMMH   | 221.02 | 8.42  | GWWEKLCWGRLNMMHG  | 165.94 | 9.72  | GWWEKLFNWGRSNMHH  | 259.20 | 20.53 | GWWEKLFNWGRQDQPK  | 94.28  | 24.39 |
| 4  | DFQVWAGAFWQLRQPG   | 172.42 | 6.57  | GWWEKLCVWGRLNMMHG | 152.39 | 8.93  | GWWEKLFNWGRQNPQA  | 252.53 | 20.01 | GWWEKLFNWGRQDQPK  | 91.01  | 23.55 |
| 5  | GWWEKLCVWGLLNMMH   | 169.72 | 6.47  | CWRELLKAWWDFCARK  | 151.59 | 8.88  | GWWEKLFNWGRQFQPA  | 246.17 | 19.50 | GWWEKLFNWGRQNPQA  | 90.70  | 23.47 |
| 6  | GWWEKLCVWGLNIHGA   | 168.39 | 6.42  | GWWEKLSAWWNIHGA   | 149.39 | 8.75  | GWWEKLFNWGRQNPQA  | 233.94 | 18.53 | CWWEKLFNWGRQNGCG  | 89.95  | 23.27 |
| 7  | MPRHRDTEVWVVKLGM   | 164.07 | 6.25  | GWWEKLCWGLNMMHM   | 143.28 | 8.40  | GWWEKLFNWGRQNPQA  | 224.81 | 17.81 | GWWEKLFNWGRQNPQA  | 89.23  | 23.09 |
| 8  | GWWEKLGAFWDFIERK   | 141.30 | 5.38  | MPRFRDQEVVTVSKLG  | 143.16 | 8.39  | GWWEKLFNFWSNRQPA  | 212.03 | 16.80 | GWWEKLFNWGRQNGHG  | 88.10  | 22.79 |
| 9  | GWWEKLCVWGRLNMPA   | 135.26 | 5.15  | GWWEKLCWGRFNMHM   | 140.64 | 8.24  | GWWEKLFNWGLNMMHG  | 210.08 | 16.64 | GWWEKLFNWGRQDQPK  | 88.02  | 22.77 |
| 10 | GWWEKLCVWVWNIHGC   | 133.01 | 5.07  | GWWEKLCVWGRQNMHM  | 139.72 | 8.19  | GWWEKLFNWGNIIHGA  | 196.24 | 15.55 | GWWEKLFNWGRDNHGH  | 86.26  | 22.32 |
| 11 | GWCEKLCVWGRLNMMH   | 125.82 | 4.79  | GWWEKLCWGRLNMMHM  | 139.40 | 8.17  | GWWEKLFNWGRQDQPK  | 192.83 | 15.28 | GWWEKLFNWGLNMMHG  | 85.95  | 22.24 |
| 12 | AQSEKCCVWQVVKQLG   | 125.75 | 4.79  | GWWEKLCWGRLNMMHG  | 136.64 | 8.01  | GWWEKLFNWGRQNLG   | 189.74 | 15.03 | GWWEKLFNWGLNMMHG  | 85.74  | 22.19 |
| 13 | GWWEKLCVWGDPIERK   | 111.89 | 4.26  | SWWEKLGAFWQLRQPG  | 136.63 | 8.01  | CWRELLKAWWRDNAM   | 188.39 | 14.92 | GWWEKLFNWGRSNMHH  | 82.14  | 21.25 |
| 14 | DFQRWKGAFWDLRQPG   | 111.01 | 4.23  | GWWEKLCWGRQNMHM   | 135.71 | 7.95  | GWWEKLFNWGRQEQPA  | 183.92 | 14.57 | GWWEKLFNWGRQFQPA  | 82.10  | 21.24 |
| 15 | TINKAWTEVWVAVSKLGM | 109.80 | 4.18  | KWYGLCFWCRNLNYRQ  | 132.83 | 7.78  | GWWEKLFNLGCGQNPQM | 176.63 | 13.99 | GWWEKLFNWGLNMMHG  | 81.93  | 21.20 |
| 16 | GWWTWKGAFWDFIERK   | 107.97 | 4.11  | GWWEKLCFAWVNIHGC  | 131.56 | 7.71  | SWWEKLFNWGRNMQPA  | 170.12 | 13.48 | SWWEKLFNWGRQNPQA  | 81.14  | 20.99 |
| 17 | EWWEKLCVWGRLNMDN   | 107.77 | 4.11  | GWWEKLCVWGRQNMHM  | 131.   |       |                   |        |       |                   |        |       |

|     |                     |        |      |                    |        |      |                   |        |       |                  |       |       |
|-----|---------------------|--------|------|--------------------|--------|------|-------------------|--------|-------|------------------|-------|-------|
| 19  | EKVEKLCVWVWNIHGR    | 106.32 | 4.05 | GWHRDSEVWQVSKLG    | 130.74 | 7.66 | GWWEKLFNWGRQNPQA  | 166.10 | 13.16 | GWWEKFFNWGLNMGH  | 76.85 | 19.88 |
| 20  | DWHRRDGGIYVNVRF     | 105.59 | 4.02 | GWFEVSNWCKLNMHM    | 130.26 | 7.63 | GWWEKLFNWGRQNGQA  | 163.74 | 12.97 | GWWEKLFNWGRQNGHG | 75.17 | 19.45 |
| 21  | QWVEFLCVWGRLNMMH    | 104.94 | 4.00 | VWRELLKAWGRFNMMH   | 130.17 | 7.63 | GWWEKLFNWGRQNPQA  | 163.48 | 12.95 | GWWEKLFNWGRQNGQA | 74.66 | 19.32 |
| 22  | KKFFYYTGFRLNMMH     | 104.39 | 3.98 | GWWEKLCGWGRFNMMH   | 129.50 | 7.59 | GWLEKLCGFVWVFNMMH | 163.41 | 12.94 | GWWEKLFNWGCSNMHA | 73.71 | 19.07 |
| 23  | GWWEKLCVWGRCNVAF    | 104.20 | 3.97 | KWWEKLCWVWNIHGA    | 128.32 | 7.52 | GWWEKLFNWGRQNMHG  | 157.74 | 12.50 | GWWEKLFNWGRQBPQA | 73.34 | 18.98 |
| 24  | SEVRWKGAFWGSIGRF    | 104.13 | 3.97 | CWWEKLCGWGRFNMMH   | 127.90 | 7.49 | GWWEKLFNWGRQNMHF  | 154.06 | 12.20 | GWWEKLFNWGRQNPQA | 73.17 | 18.93 |
| 25  | KKFFYYCVWVWVSKELG   | 101.62 | 3.87 | GWWEKLCVWVWQIHCA   | 122.85 | 7.20 | GWWEKLFNAGRQNHCA  | 151.50 | 12.00 | GWWEKLFNWGLNMGH  | 72.76 | 18.83 |
| 26  | LDRAYATEVWVAVSKLD   | 101.02 | 3.85 | GWWEKLCWVGRLNMMH   | 121.81 | 7.14 | GYWEKLFNWGRQNPQA  | 151.36 | 11.99 | GWWEKLFNWGRQNPQA | 72.31 | 18.71 |
| 27  | GWWEKLCVWGSYIGRY    | 100.75 | 3.84 | GWWEKLCGAFGRLNMMH  | 121.61 | 7.13 | GWWEKLSWGRQNMCHM  | 150.58 | 11.93 | GWWEKLFNWGRSNMMH | 72.21 | 18.68 |
| 28  | YFQRWKGAFWQLRQPA    | 100.24 | 3.82 | GWWEKLCGAFWDFTCRK  | 118.85 | 6.96 | GWWEKLFNWGRQNPQA  | 147.41 | 11.68 | GWWEKLFNWGLNMMH  | 72.08 | 18.65 |
| 29  | MPRHRDTEVWVAVSKLG   | 99.39  | 3.79 | GWWEKLCVWGRQNMHM   | 118.39 | 6.94 | AWWEKYFNWGRQNMFM  | 141.14 | 11.18 | GWWEKLFNWGRQNMHF | 71.76 | 18.57 |
| 30  | DFRARDTEVWVAVSKLG   | 99.25  | 3.78 | GWWEKLCWVGRLNMAHA  | 118.34 | 6.93 | GWWEKLCWVWDFCARK  | 139.80 | 11.07 | GWWEKLFNWGRQNGHG | 71.33 | 18.46 |
| 31  | DFERLKGAFWQLRQPA    | 99.08  | 3.77 | GWWEKLCVWVWQNPFR   | 116.80 | 6.84 | GWWEKLMNWGRLNMMHG | 138.23 | 10.95 | GWWEKLFNWGRQNPQA | 71.03 | 18.38 |
| 32  | AEVNWKGAFWDFIERK    | 98.36  | 3.75 | GWWEKLCVWGRQNMHM   | 116.78 | 6.84 | GWWEKLCWGRLNMMHG  | 137.03 | 10.86 | GWWEKLFNWGRSNMMH | 70.88 | 18.34 |
| 33  | EKVEKLCGAFWVNIHGA   | 97.28  | 3.71 | EWWEKLCVWGRQNPQA   | 116.53 | 6.83 | GWWEKLCWGRQAMHM   | 132.76 | 10.52 | CWWEKLFNWGLNMMHG | 70.86 | 18.33 |
| 34  | MPRHRDTEVWVAVSKLG   | 96.45  | 3.67 | GWWEKLCWVGRLNMMH   | 115.62 | 6.78 | GWWEKLCWVGRFNMMH  | 128.49 | 10.18 | GWWEKLFNWGRQNPQA | 70.78 | 18.31 |
| 35  | AKVEKLCVWVWNIHGA    | 96.37  | 3.67 | GWWEKLCWGRLNMMHG   | 115.26 | 6.75 | GWHRDQEVWTVVSKVG  | 127.71 | 10.12 | GWWEKLFNWGRQBPQA | 70.62 | 18.27 |
| 36  | LRRAYDTEVWVAVSKLG   | 95.13  | 3.62 | GWWEKLCVWGRSNMMH   | 114.59 | 6.71 | GWWEKYFNWGRQNPQA  | 127.64 | 10.11 | GWWEKLCWGRQNMHG  | 70.59 | 18.26 |
| 37  | MPRHRDTEVWVAVSKLG   | 95.08  | 3.62 | GWWEKLCVWGRLNMMH   | 114.07 | 6.68 | GWWEKLCWGRQNPQA   | 127.20 | 10.08 | GWWEKLFNWGRQNMHM | 70.32 | 18.20 |
| 38  | MNRHRDTEVWVAVSKLG   | 94.54  | 3.60 | GWWEKLCVWVWQIHGA   | 113.85 | 6.67 | GWWEKLCWGRLNMMHG  | 126.34 | 10.01 | GWWEKLFNWGRQNMHG | 70.31 | 18.19 |
| 39  | VWRLLDKAWGRLQMHM    | 93.74  | 3.57 | GWWEKLCVWGRQNMHM   | 113.51 | 6.65 | GWWEKLCWGRLNMMHG  | 125.26 | 9.92  | GWWEKLFNWGRQNGQA | 70.12 | 18.14 |
| 40  | VFERLKGAFWVWVFNND   | 93.16  | 3.55 | GWWEKLCVWGRQNPQA   | 113.22 | 6.63 | GWWEKLCWGRLNMMHG  | 125.18 | 9.92  | GWWEKLFNWGRQNGHG | 69.57 | 18.00 |
| 41  | GWWEKLCWVWVYIFRF    | 92.06  | 3.51 | GWFEKLCWVGRLNMMH   | 112.49 | 6.59 | MWVKLLKAWWDFCARK  | 125.13 | 9.91  | GWWEKLFNWGRQNMHG | 69.11 | 17.88 |
| 42  | SEWEKLCVWGRSNMMHM   | 91.45  | 3.48 | GWWEYLCWGRLNMMH    | 112.35 | 6.58 | NFRFRDQEVWTVVSKLG | 124.73 | 9.88  | GWWEKLFNWGLNMMHG | 69.03 | 17.86 |
| 43  | AEVTKLCVWDRFNMMH    | 89.61  | 3.41 | GWWEKLCVWGRLQPPA   | 111.97 | 6.56 | RWWEKLFNWMLQNPFC  | 124.08 | 9.83  | GWWEKLFNWGRQBPQA | 68.66 | 17.76 |
| 44  | DKVEKLCVWVWNIHGA    | 88.59  | 3.38 | FWWEKLCGAFWQMRQPG  | 111.18 | 6.51 | GWWEKLCWVWQVSKLS  | 123.07 | 9.75  | GWWEKLFNWGRQNMHG | 68.28 | 17.67 |
| 45  | EKVEKLCVWVWNIHGA    | 88.43  | 3.37 | GWWEKLCWGRLNNDPA   | 111.07 | 6.51 | GWWEKLFNWGRQIHGC  | 122.62 | 9.71  | GWWEKLFNWGRQNMHV | 66.63 | 17.24 |
| 46  | AEVNWKGAFWDRLCEA    | 88.25  | 3.36 | GWCHRDEVWVAVSKLG   | 110.02 | 6.45 | GWWEKLFNWGRQNGQA  | 122.09 | 9.67  | GWWEKLFNWGRQNPQA | 66.51 | 17.21 |
| 47  | KKFFYYTGFGLSIRKL    | 88.11  | 3.36 | GWWEKLCVWGRLNMMH   | 109.30 | 6.40 | GWWEYLCWVWDFCARK  | 121.80 | 9.65  | GWWEKLFNWGLNMMHG | 64.21 | 16.61 |
| 48  | GWVQLLKAQWGRLOPK    | 87.66  | 3.34 | GWWEKLCVWGRLNMMH   | 108.99 | 6.39 | GWWEKLCWGRLNMMHG  | 120.88 | 9.58  | GWWEKLFNWGRQBPQA | 64.17 | 16.60 |
| 49  | LPVEKLCVWVWNIHGA    | 86.32  | 3.29 | GWWEKLCVWGRQNPQA   | 108.93 | 6.38 | GWWEKLCWVWNSCERK  | 120.75 | 9.57  | GWWEKLFNWGRSNMMH | 64.17 | 16.60 |
| 50  | GWWEKLCVWVWNIHGA    | 86.30  | 3.29 | VWRELLKAWGRLEFMMH  | 107.25 | 6.28 | GWWEKLCWVWNSCERK  | 119.04 | 9.43  | GWWEKLFNWGRQNHGA | 62.39 | 16.14 |
| 51  | GWVHKLKCVWGLNMMH    | 85.76  | 3.27 | GWFEKLCWVTRNNMMH   | 104.98 | 6.15 | DWWEKLSAWVWNIHGA  | 117.89 | 9.34  | GWWEKLFNWGRQNVPA | 62.21 | 16.10 |
| 52  | VWRLLKMFGRLNMMH     | 83.58  | 3.18 | GWFEKLCWVTRNNMMH   | 104.90 | 6.15 | CWRELLKAWWDFCARK  | 115.19 | 9.13  | GWWEKLFNWGRQNMHG | 62.03 | 16.05 |
| 53  | AEVNWKGAFWVWVFNND   | 82.80  | 3.15 | GWFEKLCVWVAVSKLG   | 104.52 | 6.12 | GWWEKLCWVWNSCERK  | 114.95 | 9.11  | GWWEKLFNWGRQNPQA | 61.43 | 15.89 |
| 54  | VWRLLKMFGRLNMMH     | 82.59  | 3.15 | GWWEKLCVWGRLNMMH   | 104.16 | 6.10 | GWWEKLCWVWNSCERK  | 114.84 | 9.10  | GWWEKLFNWGRQNPQA | 61.36 | 15.88 |
| 55  | GWVHRYTGFVWVSIKGR   | 81.81  | 3.12 | GWWEKLCVWVWQIHGA   | 104.13 | 6.10 | GWWEKLCWVWNSCERK  | 114.12 | 9.04  | GWWEKLFNWGRQNPQA | 60.75 | 15.72 |
| 56  | MPRHRDTEVWVAVSKLG   | 81.81  | 3.12 | GWWEKLCVWVWQIHGA   | 104.10 | 6.10 | GWWEKLCVWGRQNMHM  | 113.58 | 9.00  | AWWEKLFNWGRSNMMH | 60.37 | 15.62 |
| 57  | LPKFFYYTGFVWVAVSKLG | 81.15  | 3.09 | GWWEKLCVWVWQIHGA   | 103.75 | 6.08 | GWWEKLCWVWNSCERK  | 111.98 | 8.87  | GWWEKLFNWGRQBPQA | 60.27 | 15.59 |
| 58  | LWRLLKMFGRLNMMH     | 80.51  | 3.07 | GWWEKLCVWGRLNMMH   | 102.74 | 6.02 | GWVWVWVWNSCERK    | 111.01 | 8.79  | GWWEKLFNWGRQNHGA | 58.87 | 15.23 |
| 59  | VWRRLKAFWQLRQND     | 79.56  | 3.03 | GWWEKLCVWGRLNMMH   | 102.53 | 6.01 | CWRELLKAWWDFCARK  | 110.90 | 8.79  | GWWEKLFNWGRQBPQA | 58.46 | 15.13 |
| 60  | GDRAMKGLWVWVWDF     | 79.46  | 3.03 | GWWEKLCVWGRSNMMH   | 101.36 | 5.94 | GWWEKLCWVWNSCERK  | 110.47 | 8.59  | GWWEKLFNWGRQNPQA | 58.37 | 15.10 |
| 61  | LPVNWKGAFWDFIERK    | 78.33  | 2.98 | GWWEKLCVWGRLNMMH   | 101.29 | 5.94 | GWWEKLCVWGRQNMHM  | 106.98 | 8.47  | AWWEKYFNWGRQBPQA | 57.95 | 14.99 |
| 62  | VWRLLKMFGRLNMMH     | 78.04  | 2.97 | GWWEKLCVWGRQNPQA   | 100.24 | 5.87 | GWWEKLFNWGRQNPQA  | 106.93 | 8.47  | GWWEKLFNWGRQNMHM | 57.54 | 14.89 |
| 63  | MWVHRYTGFVWVAVSKLG  | 77.62  | 2.96 | RWWEKLCVWGLNMMH    | 99.00  | 5.80 | GWWEKLFNWGRQNPQA  | 106.43 | 8.43  | GWWEKLFNWGRQNMHM | 57.38 | 14.85 |
| 64  | VWRLLKAFWQLRQPG     | 76.86  | 2.93 | GWWEKLCVWGRLNMMH   | 98.76  | 5.79 | GWWEKLFNWGRQNPQA  | 104.59 | 8.29  | GWWEKLFNWGRQNPQA | 57.28 | 14.82 |
| 65  | GDRAYAKWVWVWVWDF    | 76.81  | 2.93 | VWRELLKAFWVWNSCERK | 95.80  | 5.61 | GWWEKLCWVWNSCERK  | 104.58 | 8.28  | GWWEKLFNWGRQNPQA | 56.71 | 14.67 |
| 66  | KKFFYYTGFVWVAVSKLG  | 76.15  | 2.90 | GWWEKLCVWGRLNMMH   | 95.02  | 5.57 | GWWEKLCWVWNSCERK  | 103.69 | 8.21  | GWWEKLFNWGRSNMMH | 56.01 | 14.49 |
| 67  | ERFARAKWVWVWVWDF    | 75.75  | 2.89 | GWWEKLCVWVWQIHGA   | 94.23  | 5.52 | GWWEKLCWVWNSCERK  | 103.35 | 8.19  | GWWEKLFNWGRQBPQA | 55.82 | 14.44 |
| 68  | TINKAWCVWVWVWVWDF   | 75.41  | 2.87 | GWWEKLCVWVWQIHGA   | 93.92  | 5.50 | GWWEKLCWVWNSCERK  | 103.21 | 8.18  | GWWEKLFNWGRQNPQA | 55.78 | 14.43 |
| 69  | DFQRLLKMFGRLNMMH    | 73.90  | 2.82 | GWWEKLCVWVWQIHGA   | 93.18  | 5.46 | GWWEKLCWVWNSCERK  | 102.34 | 8.11  | GWWEKLFNWGRQNHGA | 55.26 | 14.30 |
| 70  | DFQRWKGAFWQLRQND    | 73.38  | 2.80 | GWWEKLCVWVWQIHGA   | 93.18  | 5.46 | GWWEKLCVWGRQNMHM  | 102.07 | 8.09  | GWWEKLFNWGRQNMHC | 55.04 | 14.24 |
| 71  | KINKAWVWVWVWVWDF    | 73.07  | 2.78 | GWFEKLCWVGRLNMMH   | 92.86  | 5.44 | GWWEKLCVWVWQIHGA  | 100.93 | 8.00  | GWWEKLFNWGRQNPQA | 54.92 | 14.21 |
| 72  | GWWEKLCVWVAVSKLG    | 72.54  | 2.76 | GWWEKLCVWGRLNMMH   | 90.18  | 5.28 | GWWEKLCWVWNSCERK  | 99.83  | 7.91  | GWWEKLFNWGRQNHGA | 54.78 | 14.17 |
| 73  | GDRAYKGLWVWVWDF     | 71.92  | 2.74 | GWWEKLCVWGRLIGDC   | 90.14  | 5.28 | GWWEKLSAWVWNIHGA  | 99.74  | 7.90  | GWWEKLFNWGRSNMMH | 54.34 | 14.06 |
| 74  | VWRLLKCVWVWVSKLG    | 71.84  | 2.73 | GWFEKLCWVGRLNMMH   | 89.74  | 5.26 | NWTEKLCVWVWVSKLG  | 99.38  | 7.87  | GWFEKLFNWGRQNPQA | 54.17 | 14.02 |
| 75  | GAWEKLCVWVWVWVWDF   | 70.53  | 2.69 | GWWEKLCVWVWVWVWDF  | 89.39  | 5.24 | GWWEKLCWVWNSCERK  | 99.22  | 7.86  | GWWEKLFNWGRQNMFM | 54.16 | 14.01 |
| 76  | AKVEKLCVWVWNIHGA    | 70.20  | 2.67 | GWWEKLCVWGRLNMMH   | 88.66  | 5.20 | GWWEKLCWVWNSCERK  | 98.03  | 7.77  | GWWEKLCWVWNSCERK | 53.93 | 13.95 |
| 77  | MPRHRDTEVWVWNIHGF   | 70.18  | 2.67 | GWWEKLCWVGRLNMMH   | 88.38  | 5.18 | GWWEKLFNWGRQNPQA  | 97.93  | 7.76  | GWWEKLFNWGRQNMHM | 53.71 | 13.90 |
| 78  | GWVHRYTGFVWVAVSKLG  | 69.59  | 2.65 | GWWEKLCVWGRLNMMH   | 88.21  | 5.17 | GWWEKLCGFVWVFNMMH | 97.65  | 7.74  | GWWEKLFNWGRQNPQA | 53.43 | 13.83 |
| 79  | GWVYKTAFAWDFIERK    | 69.25  | 2.64 | GWWEKLCVWGRLNMMH   | 87.43  | 5.12 | VWRELLKAWWDFCARK  | 96.36  | 7.63  | GWWEKLFNWGRQNHGA | 53.30 | 13.79 |
| 80  | VWRLLKMFGRLNMMH     | 67.82  | 2.58 | GWWEKLCVWGRLEMMH   | 87.35  | 5.12 | GWWEKLCWVWNSCERK  | 95.43  | 7.56  | GWWEKLFNWGRQNMHG | 53.30 | 13.79 |
| 81  | AEVNWKGAFWVWVSKLG   | 67.36  | 2.57 | GWWEKLCVWGRQNMHM   | 86.73  | 5.08 | GWWEKLCWVWNSCERK  | 95.24  | 7.54  | GWWEKLFNWGRQNPQA | 53.14 | 13.75 |
| 82  | AEVNWKGAFWVWVSKLG   | 67.07  | 2.56 | GWWEKLCVWVWQIHGA   | 86.40  | 5.06 | GWWEKLCWVWNSCERK  | 94.78  | 7.51  | GWWEKLFNWGRQNMHM | 52.54 | 13.59 |
| 83  | DFERLKGAFVWVNVRF    | 66.72  | 2.54 | GWWEKLCWVWVWQIHGA  | 86.27  | 5.06 | GWWEKLCWVWNSCERK  | 94.25  | 7.47  | GWWEKLFNWGRQNMHG | 52.46 | 13.57 |
| 84  | GMRHACVWVWVWVWDF    | 66.29  | 2.53 | GWFEKLCWVWNSCERK   | 85.08  | 4.99 | GWWEKLCWVWNSCERK  | 93.63  | 7.42  | GWWEKLFNWGRQNMHG | 52.45 | 13.51 |
| 85  | AKVYKGLWVWVWVWDF    | 66.17  | 2.52 | GWWEKLCVWGRLNMMH   | 84.53  | 4.95 | GWWEKLCWVWNSCERK  | 92.70  | 7.34  | GWWEKLFNWGRQNPQA | 51.19 | 13.25 |
| 86  | LPVEKLCGAFWGSIGRF   | 65.86  | 2.51 | GWWEKLCVWGLNMMH    | 84.50  | 4.95 | GWWEKLCWVWNSCERK  | 92.51  | 7.33  | GWWEKLFNWGRQNMHM | 51.13 | 13.23 |
| 87  | TWFLKLCVWVWVSKLG    | 65.50  | 2.50 | GWWEKLCVWGRLNMMH   | 84.09  | 4.93 | GWWEKLCWVWNSCERK  | 91.62  | 7.26  | GWWEKLFNWGRQNPQA | 50.26 | 13.00 |
| 88  | KKFFYYTGFVWQLRQEA   | 65.43  | 2.49 | VWRELLKAWGRLNMMH   | 84.00  | 4.92 | GWWEKLCWVWNSCERK  | 89.89  | 7.12  | GWVTKLFNWGRQNLG  | 49.81 | 12.89 |
| 89  | GWVHRYTGFVWVAVSKLG  | 65.09  | 2.48 | GWWEKLCVWGRLNMMH   | 83.43  | 4.89 | GWWEKLCWVWNSCERK  | 88.77  | 7.03  | GWWEKLFNWGRQNMHG | 49.59 | 12.83 |
| 90  | SEVRWKGAFWQVSKTL    | 64.78  | 2.47 | GWWEKLCVWGRLNMMH   | 82.87  | 4.86 | GWWEKLCGAFWQLRQMG | 88.37  | 7.00  | GWWEKLFNWGRQNHGA | 49.44 | 12.79 |
| 91  | LPKFFYYTGFVWVAVSKLG | 63.98  | 2.44 | GWWEKLCVWGRQRLPG   | 82.62  | 4.84 | VWRELLKAWGRQNPQA  | 88.29  | 6.99  | GWWEKLFNWGRQBPQA | 49.31 | 12.76 |
| 92  | VWRLLKMFGRLNMMH     | 63.59  | 2.42 | MPKHRDTEVWVAVSKLG  | 82.47  | 4.83 | GWWEKLCWVWNSCERK  | 87.65  | 6.94  | GWWEKLFNWGRQNPQA | 48.91 | 12.65 |
| 93  | AFRLLKMFGRLNMMH     | 63.56  | 2.42 | GWWEKLCVWVWNSCERK  | 80.64  | 4.73 | GWWEKLCWVWNSCERK  | 86.87  | 6.88  | LWWEKLFNWGRQNMHG | 48.75 | 12.61 |
| 94  | GWVHRYTGFVWVAVSKLG  | 63.13  | 2.41 | GWWEKLCWVGRLNMMH   | 80.53  | 4.72 | GWWEKLSAWVWNIHGA  | 86.77  | 6.87  | AWWEKLFNWGRQNMHG | 48.62 | 12.58 |
| 95  | GATHRACVWVWVAVSKLG  | 62.08  | 2.37 | GWWEKLCVWGRLNMMH   | 80.46  | 4.71 | GWWEKLCGFVWVFNMMH | 85.51  | 6.77  | GWWEKLFNWGRQNLPA | 48.05 | 12.43 |
| 96  | GWVYKGLWVWVWVWDF    | 61.60  | 2.35 | GWFEKLCWVWVWQIHGA  | 79.93  | 4.68 | GWVTKLWVWNSCERK   | 85.32  | 6.76  | GWWEKLFNWGRQNGHG | 47.43 | 12.27 |
| 97  | VWFLKLCVWVWVSKLG    | 61.37  | 2.34 | GWWEKLCWVWNSCERK   | 79.29  | 4.65 | GWWEKLCWVWNSCERK  | 85.07  | 6.74  | GWWEKLFNWGRQNPQA | 47.00 | 12.16 |
| 98  | DWFLKLCVWVWVWVWDF   | 60.99  | 2.32 | GWWEKLCGAFWDFTCRK  | 78.66  | 4.61 | GWWEKLCWVWNSCERK  | 84.64  | 6.71  | GWWEKLFNWGRQNPQA | 46.61 | 12.06 |
| 99  | MPRYLKGLWVWVWDF     | 60.81  | 2.32 | GWWEKLCVWDFCERK    | 77.44  | 4.54 | GWWEKLCWVWNSCERK  | 83.17  | 6.59  | GWWEKLFNWGRQNMHM | 46.19 | 11.95 |
| 100 | VKRAYAKWVWVWVWDF    | 60.43  | 2.30 | GWWEKLCVWGRQNPQA   | 76.92  | 4.51 | GWWEKLCWVWNSCERK  | 82.60  | 6.54  | GWWEKLFNWGRQBPQA | 45.82 | 11.85 |
| 101 | SWVHRYTGFVW         |        |      |                    |        |      |                   |        |       |                  |       |       |

|     |                    |       |      |                    |       |      |                    |       |      |                    |       |       |
|-----|--------------------|-------|------|--------------------|-------|------|--------------------|-------|------|--------------------|-------|-------|
| 115 | AKVVKCEVWVNIHLG    | 52.81 | 2.01 | MPRHRDTEVWTVMKLG   | 63.83 | 3.74 | GWWEKLCGWGRNQQA    | 73.31 | 5.81 | GWWEKLFVWGGNIHPM   | 41.72 | 10.80 |
| 116 | AYVFRLEQILKSIERR   | 52.32 | 1.99 | GWWEKLCGWGRNQQA    | 62.91 | 3.69 | YVWEKLCGWGRFNHMA   | 72.71 | 5.76 | GWWEKLFNWGRQDQPA   | 41.49 | 10.73 |
| 117 | GWYKGSFAWQLRQRA    | 52.30 | 1.99 | DFQYWACGWGRLNMMH   | 58.67 | 3.44 | GWLEKLCGWGRLNMMH   | 72.02 | 5.71 | GWWEKLFNWGRQDQPK   | 41.17 | 10.65 |
| 118 | CWWEKTLTFLDFIGRK   | 51.61 | 1.97 | GWWLRLCTWGRLNMMH   | 57.97 | 3.40 | SWWEKLGAFWQLRVYHM  | 71.75 | 5.68 | GYWEKLFNWGRQDQPPA  | 41.13 | 10.64 |
| 119 | LDRAKAWCLDFIERK    | 51.09 | 1.95 | VWNERDSEVWVSKL     | 57.22 | 3.35 | GWRELSKAWWDFCARK   | 69.38 | 5.50 | GWWEKLLKAWWRDNCAR  | 40.45 | 10.47 |
| 120 | LVFHRLRGVFFIYGR    | 50.54 | 1.93 | GWNEKLCVWGRVQIHA   | 56.69 | 3.32 | GWWEKLCVWGRVNIHEA  | 69.33 | 5.49 | GWWEKLFNWGRQDQPA   | 40.11 | 10.38 |
| 121 | LPKFLGTAFWQDRQTD   | 50.30 | 1.92 | GWWEKLCVWGRVQSN    | 56.40 | 3.30 | GWWEKLCVWGRVLYMHG  | 66.97 | 5.31 | GWWEKLFNWGRQDQHG   | 39.35 | 10.18 |
| 122 | DWFLKLCVWAEISIFRF  | 50.17 | 1.91 | GYWEKLCVWGFPCERK   | 56.26 | 3.30 | GWWEKLCVWGRFNMSM   | 66.36 | 5.26 | GWWEKLFNWGRQDQHM   | 39.19 | 10.14 |
| 123 | VDRAYAKWCLMFCDE    | 49.43 | 1.88 | GEANWKGAWWNIHGA    | 56.07 | 3.29 | GDWEKLFNFGRQDQPA   | 65.58 | 5.19 | SWWEMLANWGRNRPQM   | 38.97 | 10.08 |
| 124 | GWCKQACRQVGLAMHV   | 48.05 | 1.83 | GWWEKLCVWGRVQSN    | 56.00 | 3.28 | GWWEKLCVWGRVLYMHG  | 64.77 | 5.13 | GWWEELFNWGRSNMHH   | 38.58 | 9.98  |
| 125 | AKOYSTGALLDIYGRY   | 47.96 | 1.83 | GWCEYLCVWGRVQSN    | 55.97 | 3.28 | KWWELELEGRQDQPA    | 63.91 | 5.06 | SWWNLKLFNWGRQDQPM  | 38.50 | 9.96  |
| 126 | DFRLLKAGALMFTDF    | 47.86 | 1.82 | AEVNWKGAWWVSTKLG   | 55.60 | 3.26 | CWWEKLFNFGGRQSKLG  | 63.56 | 5.03 | GWWEKLMNWGGNIHGA   | 38.42 | 9.94  |
| 127 | DFRLLKAGALFISIGRK  | 47.83 | 1.82 | GWWEKLCVWGRVQSN    | 55.24 | 3.24 | GWWEKLCVWGRVQIHA   | 63.51 | 5.03 | GWWEKLFNWGRQDQHPA  | 37.69 | 9.75  |
| 128 | VWRLLLTGILAFILRF   | 47.56 | 1.81 | LWWEGLCVWGRVQSN    | 54.70 | 3.21 | GWWEKLCVWGRVQSN    | 63.33 | 5.02 | GWWEGLFNWGRQDQPA   | 37.68 | 9.75  |
| 129 | ARVSWKGAFSDFIERK   | 47.54 | 1.81 | GWAEKLDGWGRVQSN    | 54.05 | 3.17 | GWWEKLCVWGRVQSN    | 62.51 | 4.95 | GWWEKLCVWGRVQSN    | 37.59 | 9.73  |
| 130 | LWVYEGCAVWRQDQDC   | 47.17 | 1.80 | GWWEKLCVWGRVQSN    | 53.31 | 3.12 | GWWEKLCVWGRVQSN    | 61.29 | 4.85 | GWWEKLFNWGRQDQHM   | 37.00 | 9.57  |
| 131 | LWVYEGCAVWRQDQDC   | 47.04 | 1.79 | VWWEKLCVWGRVQSN    | 51.86 | 3.04 | GWWEKLCVWGRVQSN    | 59.90 | 4.74 | GVWEKLFNWGRVQSN    | 36.58 | 9.47  |
| 132 | EKVEKLGAFWTSIGRA   | 46.57 | 1.77 | GWFEKLCVWGRVQSN    | 51.70 | 3.03 | GWWEKLEGGWVFCERD   | 59.09 | 4.68 | GWWEKLFNWTRNNQPA   | 35.44 | 9.17  |
| 133 | AEVNWKGVWVSKL      | 46.24 | 1.76 | GWWMKLCVWGRVQSN    | 50.99 | 2.99 | GWWEKLCVWGRVQSN    | 58.82 | 4.66 | GWWEKLFNWGRQDQHPA  | 35.36 | 9.15  |
| 134 | GWYKATAFWQLRQEA    | 46.00 | 1.75 | GWWEKLCVWGRVQSN    | 50.75 | 2.97 | GWWEKLCVWGRVQSN    | 54.23 | 4.30 | GWWEKLFNWGRQDQPK   | 35.19 | 9.11  |
| 135 | VWRLLKCVWVWEYINA   | 44.86 | 1.71 | GWWEKLCVWGRVQSN    | 50.61 | 2.97 | GWWEKLCVWGRVQSN    | 54.13 | 4.29 | CWRELLKAWWRDQDQPA  | 35.04 | 9.07  |
| 136 | AKVLLKCVWVSKVGL    | 44.60 | 1.70 | DFQVWLCVWGRVQSN    | 49.60 | 2.91 | GWFEKLCVWGRVQSN    | 52.03 | 4.12 | GWFEKYFNWGRQDQHPA  | 34.20 | 8.85  |
| 137 | AFVWMLKCVWGRVLYMHG | 44.26 | 1.69 | DFQVWACGWGRVQSN    | 49.34 | 2.89 | GWWEKLCVWGRVQSN    | 51.97 | 4.12 | GWWEKLCVWGRVQSN    | 33.04 | 8.55  |
| 138 | AKVEKLCVWGRVQSN    | 44.09 | 1.68 | GWFEKLCVWGRVQSN    | 49.25 | 2.88 | FWWEKLCVWGRVQSN    | 51.47 | 4.08 | GWWEKLFNWGRQDQPM   | 32.90 | 8.51  |
| 139 | KKFFYYTGFVQLRQPA   | 43.65 | 1.66 | GWWEKLCVWGRVQSN    | 48.78 | 2.86 | GWWEKLCVWGRVQSN    | 51.42 | 4.07 | GWWMKLFVWGRQDQHM   | 32.71 | 8.46  |
| 140 | FFVWMLKCVWVWEYINA  | 43.40 | 1.65 | MPRHRDAEVTWVQSN    | 48.74 | 2.86 | SWWEKLCVWGRVQSN    | 51.35 | 4.07 | GWWEKLFNWGRVQSN    | 32.58 | 8.43  |
| 141 | LDRAKAWCLDFIERK    | 42.83 | 1.63 | GWFEKLCVWGRVQSN    | 48.38 | 2.84 | GWWDYLCVWGRVQSN    | 51.35 | 4.07 | GWLEKLFNWGRQDQHG   | 32.46 | 8.40  |
| 142 | LPTFRLEGWGRVQSN    | 42.42 | 1.62 | GWWEKLCVWGRVQSN    | 44.82 | 2.63 | FWWEKLCVWGRVQSN    | 50.45 | 4.00 | KWWEKLFNWGRQDQHPA  | 30.64 | 7.93  |
| 143 | TMNKKLCVWGRVQSN    | 41.98 | 1.60 | GWWEKLCVWGRVQSN    | 44.80 | 2.63 | GWFEKLCVWGRVQSN    | 49.88 | 3.95 | RRWEKLFNWGRQDQHG   | 30.57 | 7.91  |
| 144 | AEVNWKGAAGVRLNMMH  | 41.32 | 1.57 | AEVNWKGAAGVRLNMMH  | 44.60 | 2.61 | GWWEKLCVWGRVQSN    | 49.14 | 3.89 | GWVFKLFTWGRVQSN    | 30.04 | 7.77  |
| 145 | EKCEKLGAFWTSIGRA   | 40.67 | 1.55 | GWWEKLCVWGRVQSN    | 44.32 | 2.60 | GWWEKLCVWGRVQSN    | 47.56 | 3.77 | GWWEKLFNWGRQDQHPA  | 29.37 | 7.60  |
| 146 | MPREKLSVWGRVQSN    | 40.16 | 1.53 | AEVNWKGAAGVRLNMMH  | 43.97 | 2.58 | GWWEKLCVWGRVQSN    | 47.26 | 3.74 | CWWEKLFNWGRQDQHPA  | 28.96 | 7.49  |
| 147 | DFRLLKELWVWVSKL    | 40.06 | 1.53 | DFYVWAGVWQVQSN     | 43.78 | 2.57 | GWWEKLCVWGRVQSN    | 47.12 | 3.73 | GWWEKLMNWGRVQSN    | 28.84 | 7.46  |
| 148 | DFEKLKCVWGRVQSN    | 40.00 | 1.52 | GWWEKLCVWGRVQSN    | 42.24 | 2.47 | GWWEKLCVWGRVQSN    | 46.20 | 3.66 | CWRELLKAWWRDQDQPA  | 28.62 | 7.40  |
| 149 | MPRHRDTEVWAFIQRK   | 39.76 | 1.51 | GWWEKLCVWGRVQSN    | 41.56 | 2.44 | GWWEKLCVWGRVQSN    | 45.21 | 3.58 | GWWEKLFNWGRQDQHPA  | 28.49 | 7.37  |
| 150 | VWVYLGKELENAKGL    | 38.73 | 1.48 | GWWEKLCVWGRVQSN    | 41.45 | 2.43 | GWWEKLCVWGRVQSN    | 45.08 | 3.57 | GWWRKLFNWGRVQSN    | 27.82 | 7.20  |
| 151 | LVFHRLRGVFFIYGRY   | 38.69 | 1.47 | GWLEKLCVWGRVQSN    | 40.63 | 2.38 | GWWEKLCVWGRVQSN    | 44.70 | 3.54 | GWWEKLFNWGRQDQPM   | 27.23 | 7.04  |
| 152 | GKTHRACVWSEKGL     | 37.78 | 1.44 | GWWEKLCVWGRVQSN    | 40.50 | 2.37 | GWWEKLCVWGRVQSN    | 42.43 | 3.36 | AWWEKYFRKGRQDQHG   | 26.87 | 6.95  |
| 153 | GWYKATAFAQLRQPA    | 37.71 | 1.44 | QWWEKLCVWGRVQSN    | 38.97 | 2.28 | VWWEKLCVWGRVQSN    | 42.32 | 3.35 | GWWEKLFNWGRQDQHG   | 26.68 | 6.90  |
| 154 | VWRRCGAFWQLRQKA    | 37.56 | 1.43 | GWWEKLCVWGRVQSN    | 38.47 | 2.25 | GWWEKLCVWGRVQSN    | 40.92 | 3.24 | GWWEKLFNWGRVQSN    | 26.50 | 6.86  |
| 155 | GWWEKLCVWGRVQSN    | 37.01 | 1.41 | GWWEKLCVWGRVQSN    | 38.31 | 2.24 | GWWEKLCVWGRVQSN    | 38.70 | 3.07 | GWWEKLFNWGRVQSN    | 26.41 | 6.83  |
| 156 | GWYKATAFANCVAC     | 36.94 | 1.41 | VWVYLGKELENAKGL    | 37.96 | 2.22 | CWRELLKAWWRDQDQHPA | 38.49 | 3.05 | GWWNLKLFNWGRVQSN   | 26.12 | 6.76  |
| 157 | SDRRLKAGALFISEYRF  | 36.58 | 1.39 | GWWEKLCVWGRVQSN    | 37.40 | 2.19 | VWRELLYAWWRDQDQHPA | 38.39 | 3.04 | GWWNLKLFNWGRVQSN   | 25.62 | 6.63  |
| 158 | DWFLYTGFLSIGDC     | 36.38 | 1.39 | TWFEALCDWGRVQSN    | 36.77 | 2.15 | SWWLLKAWWRDQDQHPA  | 37.74 | 2.99 | CWREMLKFWWVQSN     | 25.45 | 6.58  |
| 159 | LVFHAKRQCVWVSKL    | 34.16 | 1.30 | GWFEKLCVWGRVQSN    | 36.45 | 2.14 | DWWEKLCVWGRVQSN    | 36.87 | 2.92 | GWWEKLFNWGRQDQHPA  | 25.02 | 6.47  |
| 160 | GWWEKLCVWGRVQSN    | 33.31 | 1.27 | GWWEKLCVWGRVQSN    | 36.06 | 2.11 | SWWETLCVWGRVQSN    | 36.76 | 2.91 | GWWEKLFNWGRVQSN    | 23.93 | 6.19  |
| 161 | TWYKGSAGVQVIGGA    | 32.98 | 1.26 | GWWEKLCVWGRVQSN    | 33.61 | 1.97 | GWWEKLCVWGRVQSN    | 35.43 | 2.81 | GWWEKLCVWGRVQSN    | 23.91 | 6.19  |
| 162 | MPRLLKCVWGRVQSN    | 32.59 | 1.24 | MPLHRAAGVWDFICRK   | 33.11 | 1.94 | GWWEKLCVWGRVQSN    | 34.94 | 2.77 | GRWEKLFNWGRVQSN    | 23.52 | 6.08  |
| 163 | DEVSNTGILAFIQRK    | 32.00 | 1.22 | VWRELLYAWWRDQDQHPA | 32.38 | 1.90 | GWWEKLCVWGRVQSN    | 34.77 | 2.75 | GWWEKLFNWGRVQSN    | 22.11 | 5.72  |
| 164 | ANRLLKCVWGRVQSN    | 31.84 | 1.21 | GWWEKLCVWGRVQSN    | 31.78 | 1.89 | GWWEKLCVWGRVQSN    | 34.28 | 2.72 | GKWEYLFNWGRVQSN    | 19.66 | 5.09  |
| 165 | AYVNYNTGILAFIQRK   | 30.71 | 1.17 | GWWEKLCVWGRVQSN    | 31.20 | 1.86 | CWAEKLCVWGRVQSN    | 33.60 | 2.66 | SWWEKLFNWGRVQSN    | 17.49 | 4.52  |
| 166 | LDRAAKAWQVQVIGGA   | 30.17 | 1.15 | DWVWMLKCVWGRVQSN   | 30.12 | 1.76 | CFRELLKAWWRDQDQHPA | 32.54 | 2.58 | GWWAKLAWWRVQSN     | 17.21 | 4.45  |
| 167 | GKTGRDCVWGRVQSN    | 30.14 | 1.15 | VWFEKLCVWGRVQSN    | 29.58 | 1.73 | GWWEKLCVWGRVQSN    | 32.52 | 2.58 | GWVFKLFTWGRVQSN    | 16.76 | 4.34  |
| 168 | GWWEKLCVWGRVQSN    | 30.08 | 1.15 | GWFEKLCVWGRVQSN    | 28.86 | 1.69 | CWRELLKAWWRDQDQHPA | 32.47 | 2.57 | CWQEKLFNWGRVQSN    | 16.65 | 4.31  |
| 169 | LPTFRLEGVQVIGGA    | 29.27 | 1.11 | GWFEKLCVWGRVQSN    | 28.80 | 1.69 | SWWEKLCVWGRVQSN    | 32.36 | 2.56 | SWWEVRFNCGRALQPK   | 15.64 | 4.05  |
| 170 | AYRHRDTEVWVSKL     | 28.64 | 1.09 | AEVNWKGAAGVRLNMMH  | 28.38 | 1.66 | GWWEKLCVWGRVQSN    | 31.04 | 2.46 | GWWEKLFNWGRVQSN    | 15.34 | 3.97  |
| 171 | MWQYKGTALLDYGIMH   | 28.39 | 1.08 | GWWEKLCVWGRVQSN    | 28.10 | 1.65 | GWWEKLCVWGRVQSN    | 27.23 | 2.16 | GWWEKLFNWGRVQSN    | 14.67 | 3.79  |
| 172 | LPKFFYYTRFLSIGDC   | 27.76 | 1.06 | GWWEKLCVWGRVQSN    | 27.96 | 1.64 | VWRELLYAWWRDQDQHPA | 25.60 | 2.03 | GWWEKLFNWGRVQSN    | 14.60 | 3.78  |
| 173 | LDRAKAWCLDFIERK    | 27.56 | 1.05 | GYWEKLCVWGRVQSN    | 27.02 | 1.58 | GWWEKLCVWGRVQSN    | 23.28 | 1.84 | GWWEKLFNWGRVQSN    | 13.38 | 3.46  |
| 174 | SEVNWKGAAGVRLNMMH  | 26.65 | 1.02 | GWWEKLCVWGRVQSN    | 26.65 | 1.56 | GWWEKLCVWGRVQSN    | 22.87 | 1.81 | AWWEKLCVWGRVQSN    | 12.23 | 3.16  |
| 175 | AKFEKACVWGRVQSN    | 25.95 | 0.99 | QVTLKLFVWGRVQSN    | 22.57 | 1.32 | MPWELLSAWWNIHGA    | 21.75 | 1.72 | EWWEKLFNWGRVQSN    | 10.92 | 2.82  |
| 176 | VWRLLLTGFCGSIQDC   | 24.51 | 0.93 | GWWEKLCVWGRVQSN    | 21.90 | 1.28 | CWRELLKAWWRDQDQHPA | 20.75 | 1.64 | GWTEKAFNWGRVQSN    | 10.51 | 2.72  |
| 177 | ERFARLCVWSEMFND    | 24.22 | 0.92 | GWYGLLEARRQTHGA    | 21.60 | 1.27 | GWWEKLCVWGRVQSN    | 20.72 | 1.64 | KRWEKLFNWGRVQSN    | 10.30 | 2.67  |
| 178 | EKVELLCVWVSVIGLV   | 24.08 | 0.92 | VWWDKLCVWGRVQSN    | 21.28 | 1.25 | MPRFRDQTVWVQIHA    | 19.08 | 1.51 | GVLEKLFNWGRVQSN    | 10.11 | 2.62  |
| 179 | MPRHLKCVWGRVQSN    | 23.95 | 0.91 | MCFERLCVWGRVQSN    | 19.04 | 1.12 | GFWRVCFYVGRVQSN    | 18.37 | 1.46 | GWYKLGWVQVQSN      | 9.97  | 2.42  |
| 180 | TINKAWTEVWVSKL     | 23.24 | 0.89 | GWWEKLCVWGRVQSN    | 17.12 | 1.00 | GWWEKLCVWGRVQSN    | 17.87 | 1.42 | GWWEKLFNWGRVQSN    | 9.09  | 2.35  |
| 181 | GWYKGTALLDYGIMH    | 23.22 | 0.88 | AEVNWKGAAGVRLNMMH  | 16.10 | 0.94 | GWCEKLCVWGRVQSN    | 16.04 | 1.27 | GYWEKLFNWGRVQSN    | 8.96  | 2.32  |
| 182 | KKFFYYTGFVQLRQPA   | 22.76 | 0.87 | GWWEKLCVWGRVQSN    | 15.78 | 0.92 | GWDEGLFFWGRVQSN    | 15.15 | 1.20 | CWRELLKAWWRDQDQHPA | 8.64  | 2.23  |
| 183 | MPRHRDTEVWVSKL     | 21.12 | 0.80 | VWWEKLCVWGRVQSN    | 13.69 | 0.80 | GWWEKLCVWGRVQSN    | 14.96 | 1.19 | GWWEKLFNWGRVQSN    | 7.76  | 2.01  |
| 184 | GWQYKGTALLDYGIMH   | 20.46 | 0.78 | AEVNRDSEVWVSKL     | 13.26 | 0.78 | MPRFRDQTVWVQIHA    | 13.68 | 1.08 | CWREKLFNWGRVQSN    | 7.45  | 1.93  |
| 185 | LDMEYAGWTLWEQTRF   | 19.47 | 0.74 | GWWEKLCVWGRVQSN    | 12.90 | 0.76 | MPRFRDQTVWVQIHA    | 12.61 | 1.00 | GWWEKLFNWGRVQSN    | 6.92  | 1.79  |
| 186 | MPMHRDTEVWVSKL     | 19.47 | 0.74 | GWLEKLCVWGRVQSN    | 12.38 | 0.73 | RWVVDQAKWGRVQSN    | 10.76 | 0.85 | GWWEKLCVWGRVQSN    | 6.88  | 1.78  |
| 187 | GWYKATAFVQVIGGA    | 18.95 | 0.72 | GRFEKLCVWGRVQSN    | 12.22 | 0.72 | GWWEKLCVWGRVQSN    | 10.73 | 0.85 | GQVLLKCVWGRVQSN    | 6.47  | 1.67  |
| 188 | DFRRLKAGALFISIGRK  | 18.12 | 0.69 | GWDEKLCVWGRVQSN    | 11.62 | 0.68 | GWWEKLCVWGRVQSN    | 10.37 | 0.82 | GWWEKLFNWGRVQSN    | 6.10  | 1.58  |
| 189 | AVVEKLGAFWTSIGRA   | 17.71 | 0.67 | GWWEKLCVWGRVQSN    | 10.65 | 0.67 | GWWEKLCVWGRVQSN    | 9.26  | 0.73 | GWFEKLFNWGRVQSN    | 5.34  | 1.38  |
| 190 | DFQRWKEGCVWVSKL    | 16.45 | 0.63 | AEVNYKGAAGVRLNMMH  | 9.66  | 0.52 | MPREKLCVWGRVQSN    | 7.73  | 0.61 | GWWAKERAWGGTTHQR   | 5.26  | 1.36  |
| 191 | LPRHRDTEVWVSKL     | 16.27 | 0.62 | GWWEKLCVWGRVQSN    | 8.97  | 0.53 | GWWEKLCVWGRVQSN    | 6.70  | 0.53 | GWWEKLFNWGRVQSN    | 5.20  | 1.35  |
| 192 | MKVEKACVWVSKL      | 13.74 | 0.52 | DFVNWKGAAGVRLNMMH  | 8.80  | 0.52 | GNWHRDSEVWVQSN     | 5.69  | 0.45 | GWWEKLCVWGRVQSN    | 4.08  | 1.06  |
| 193 | MPYHRDTEVWVSKL     | 10.64 | 0.41 | GWDLRVCKEGLNMMH    | 6.67  | 0.39 | GRFRDQEVWVQSN      | 5.00  | 0.40 | CWRELLKAWWRDQDQHPA | 3.81  | 0.99  |
| 194 | MPRDRDTEVWDFIERK   | 8.91  | 0.34 | GAVAKDVTLRQVQSN    | 4.42  | 0.26 | GWWRMNVWGRVQSN     | 4.03  | 0.32 | SWWEKLFNWGRVQSN    | 3.20  | 0.98  |
| 195 | EKVEKLCVWGRVQSN    | 8.25  | 0.31 | GWWEKLCVWGRVQSN    | 3.72  | 0.22 | MPRFRDQTVWVQIHA    | 3.33  | 0.26 | GEFQKLCVWGRVQSN    | 3.83  | 0.84  |
| 196 | MPRHRDTEVWVSKL     | 6.57  | 0.25 | MPRHRDTEVWVQSN     | 3.19  | 0.19 | GWWEKLCVWGRVQSN    | 2.61  | 0.21 | GWWEKLFNWGRVQSN    | 3.14  | 0.81  |
| 197 | MPGHRDTEVWVQIHA    | 1.41  | 0.05 | AEVNEKLCVWGRVQSN   | 2.07  | 0.12 | CAWERCFTDGRQDQHPA  | 1.45  | 0.11 | GWWEKLFNWGRVQSN    | 3.13  | 0.81  |
| 198 | MPQHRATEVWVSKL     | 1.29  | 0.05 | AEVNRDSE           |       |      |                    |       |      |                    |       |       |

|                   |       |      |                   |       |      |                  |        |      |                    |       |       |
|-------------------|-------|------|-------------------|-------|------|------------------|--------|------|--------------------|-------|-------|
| VWRLLLKAFWQLRQPG  | 71.63 | 2.73 | DFQVWAGAFWQLRQPG  | 98.27 | 5.76 | GWWEKLCVWGRQNMHG | 102.85 | 8.15 | GWWEKLFNFWNSRQPA   | 68.68 | 17.77 |
| KKFFYYTGLFSGIDGC  | 71.41 | 2.72 | VWRELLKAWGRLNMMH  | 96.53 | 5.66 | CWWEKLCVWGRQNMHG | 102.72 | 8.14 | GWWEKLFNFWGRQNMHG  | 62.49 | 16.17 |
| GDRAYGKVLMMFWDN   | 71.15 | 2.71 | GWWEKLCVWVWNIHGC  | 96.48 | 5.65 | GWWEKLCVWGRQNMHG | 102.29 | 8.10 | GWWEKLFVWGRQNMHF   | 56.30 | 14.57 |
| LPKFFYYTGLFCSIKLG | 69.34 | 2.64 | VWWEKLCVWGRQNMHG  | 93.82 | 5.50 | GWWEKLCVWGRQNMHG | 97.77  | 7.75 | GWWEKLFNLGRQNMFM   | 54.33 | 14.06 |
| AKVEKACVWVSVKLG   | 67.71 | 2.58 | GWWEKLCVWQRLRQSN  | 92.17 | 5.40 | GWWEKLCVWGRQNMHG | 97.58  | 7.73 | GWWEKLFNANWGRQNMFM | 51.03 | 13.20 |
| DWFLKCVWVSVKLG    | 67.19 | 2.56 | GWWEYLCVWGRQNMHG  | 91.29 | 5.35 | GWWEKLCVWGRQNMHG | 96.81  | 7.67 | GWWEKLFNAGRQNMHCA  | 49.49 | 12.81 |
| TINKAWTLNDFDFIGRK | 67.05 | 2.55 | GWWEKLCVWGRQNMHG  | 90.83 | 5.32 | GWWEKLCVWGRQNMHG | 93.45  | 7.40 | GWWEKLFNFWGRQNMGA  | 47.98 | 12.41 |
| DFERLKGAFWMMFWDN  | 66.71 | 2.54 | GWWEKLCVWGRQNMHG  | 88.85 | 5.21 | GWWEKLCVWGRQNMHG | 91.28  | 7.23 | CWRELLKAWWRDNCAM   | 47.30 | 12.24 |
| VWRLLLKELWVSVKLG  | 63.07 | 2.40 | GWWEKLCVWGRQNMHG  | 85.58 | 5.01 | GWWEKLCVWGRQNMHG | 90.75  | 7.19 | GWWEKLFNFWGRQNMCA  | 45.85 | 11.86 |
| DFRRLKGAIFSIYRF   | 61.44 | 2.34 | AEVHRDSEVWVAVSKLG | 83.73 | 4.91 | GWWEKLCVWGRQNMHG | 87.13  | 6.90 | GWWEKLFNFWGRQNMCHM | 40.84 | 10.57 |
| GWWHRYGYIYVYVYRF  | 60.97 | 2.32 | GWWEKLCVWGRQNMHG  | 78.55 | 4.60 | GWWEKLCVWGRQNMHG | 86.99  | 6.89 | GWWEKLFNFWGRQNMCPA | 39.48 | 10.22 |
| AFVWMLKCVWVWYVYRF | 52.60 | 2.00 | GWWEKLCVWGRQNMHG  | 66.35 | 3.89 | GWWEKLCVWGRQNMHG | 83.21  | 6.59 | GWWEKLFNFWGRQNMCPA | 37.01 | 9.58  |
| GWVYKGSFAVQVIGRC  | 52.22 | 1.99 | AEVNWRFVWVAVSKLG  | 63.23 | 3.71 | GWWEKLCVWGRQNMHG | 81.97  | 6.49 | GWWEKLFNFWGRQNMCHM | 34.37 | 8.89  |
|                   |       |      | GWWEKLCVWGRQNMMPA | 59.88 | 3.51 | GWWEKLCVWGRQNMHG | 72.21  | 5.72 | GWWEKLCVWGRQNMCHM  | 33.30 | 8.62  |

|    | Generation 7      | x      | c     | Generation 8      | x     | c     | Generation 9      | x     | c     | Generation 10     | x     |
|----|-------------------|--------|-------|-------------------|-------|-------|-------------------|-------|-------|-------------------|-------|
| 1  | TWWEKLFNFWGRQNMCA | 121.83 | 34.42 | SWWEKLFNFWGMLNMPK | 72.31 | 46.38 | SWWEKLFNFWGMLNMPK | 72.20 | 62.77 | SWWEKLFNFWGMLNMPK | 81.11 |
| 2  | QWWEKLFNFWGRQNMCA | 108.20 | 30.57 | KWWEKLFNFWGMLNMPK | 68.43 | 43.89 | NWWEKLFNFWGMLNMPK | 68.73 | 59.75 | SWWEKLFNFWGMLNMPK | 79.08 |
| 3  | GWWEKLFNFWGRQNMCA | 107.42 | 30.35 | GWWEKLFNFWGMLNMPK | 66.38 | 42.58 | GWWEKLFNFWGMLNMPK | 66.58 | 57.88 | SWWEKLFNFWGMLNMPK | 75.49 |
| 4  | GWWEKLFNFWGRQNMCA | 102.30 | 28.90 | GWWEKLFNFWGMLNMPK | 64.40 | 41.31 | KWWEKLFNFWGMLNMPK | 66.42 | 57.75 | NWWEKLFNFWGMLNMPK | 73.76 |
| 5  | GWWEKLFNFWGRQNMCA | 100.32 | 28.34 | NWWEKLFNFWGMLNMPK | 59.83 | 38.38 | NWWEKLFNFWGMLNMPK | 65.09 | 56.59 | KWWEKLFNFWGMLNMPK | 73.33 |
| 6  | GWWEKLFNFWGRQNMCA | 99.27  | 28.04 | SWWEKLFNFWGMLNMPK | 57.43 | 36.84 | GWWEKLFNFWGMLNMPK | 64.21 | 55.82 | SWWEKLFNFWGMLNMPK | 71.05 |
| 7  | GWWEKLFNFWGRQNMCA | 98.45  | 27.81 | SWWEKLFNFWGMLNMPK | 56.39 | 36.17 | KWWEKLFNFWGMLNMPK | 59.69 | 51.89 | SWWEKLFNFWGMLNMPK | 68.79 |
| 8  | EWWEKLFNFWGRQNMCA | 96.55  | 27.28 | RWWEKLFNFWGMLNMPK | 55.55 | 35.63 | GWWEKLFNFWGMLNMPK | 57.08 | 49.63 | SWWEKLFNFWGMLNMPK | 66.55 |
| 9  | SWWEKLFNFWGRQNMCA | 96.48  | 27.26 | SWWEKLFNFWGMLNMPK | 55.44 | 35.56 | TWWEKLFNFWGMLNMPK | 56.94 | 49.50 | TWWEKLFNFWGMLNMPK | 66.22 |
| 10 | GWWEKLFNFWGRQNMCA | 96.35  | 27.22 | TWWEKLFNFWGMLNMPK | 54.69 | 35.08 | CWWEKLFNFWGMLNMPK | 56.85 | 49.25 | KWWEKLFNFWGMLNMPK | 65.61 |
| 11 | SWWEKLFNFWGRQNMCA | 95.18  | 26.89 | CWWEKLFNFWGMLNMPK | 54.66 | 35.06 | GWWEKLFNFWGMLNMPK | 56.27 | 48.92 | TWWEKLFNFWGMLNMPK | 63.73 |
| 12 | GWWEKLFNFWGRQNMCA | 94.50  | 26.70 | SWWEKLFNFWGMLNMPK | 53.47 | 34.30 | GWWEKLFNFWGMLNMPK | 56.19 | 48.85 | GWWEKLFNFWGMLNMPK | 63.22 |
| 13 | EWWEKLFNFWGRQNMCA | 94.33  | 26.65 | GWWEKLFNFWGMLNMPK | 53.42 | 34.27 | TWWEKLFNFWGMLNMPK | 55.12 | 47.92 | SWWEKLFNFWGMLNMPK | 62.57 |
| 14 | SWWEKLFNFWGRQNMCA | 93.31  | 26.36 | GWWEKLFNFWGMLNMPK | 53.39 | 34.25 | SWWEKLFNFWGMLNMPK | 55.04 | 47.85 | GWWEKLFNFWGMLNMPK | 59.83 |
| 15 | GWWEKLFNFWGRQNMCA | 92.78  | 26.21 | GWWEKLFNFWGMLNMPK | 53.27 | 34.17 | SWWEKLFNFWGMLNMPK | 54.62 | 47.48 | TWWEKLFNFWGMLNMPK | 59.75 |
| 16 | GWWEKLFNFWGRQNMCA | 92.32  | 26.08 | CWWEKLFNFWGMLNMPK | 52.92 | 33.95 | GWWEKLFNFWGMLNMPK | 54.34 | 47.24 | GWWEKLFNFWGMLNMPK | 59.66 |
| 17 | CWWEKLFNFWGRQNMCA | 92.11  | 26.02 | GWWEKLFNFWGMLNMPK | 52.49 | 33.67 | SWWEKLFNFWGMLNMPK | 54.20 | 47.12 | SWWEKLFNFWGMLNMPK | 59.52 |
| 18 | GWWEKLFNFWGRQNMCA | 91.74  | 25.92 | SWWEKLFNFWGMLNMPK | 50.72 | 32.54 | GWWEKLFNFWGMLNMPK | 54.17 | 47.10 | NWWEKLFNFWGMLNMPK | 59.50 |
| 19 | GWWEKLFNFWGRQNMCA | 91.45  | 25.84 | TWWEKLFNFWGMLNMPK | 50.55 | 32.43 | TWWEKLFNFWGMLNMPK | 53.33 | 46.37 | CWWEKLFNFWGMLNMPK | 58.00 |
| 20 | GWWEKLFNFWGRQNMCA | 91.37  | 25.81 | TWWEKLFNFWGMLNMPK | 50.41 | 32.34 | SWWEKLFNFWGMLNMPK | 53.22 | 46.27 | GWWEKLFNFWGMLNMPK | 57.64 |
| 21 | CWWEKLFNFWGRQNMCA | 91.05  | 25.72 | DWWEKLFNFWGMLNMPK | 50.39 | 32.32 | GWWEKLFNFWGMLNMPK | 52.70 | 45.81 | KWWEKLFNFWGMLNMPK | 56.84 |
| 22 | SWWEKLFNFWGRQNMCA | 89.17  | 25.19 | GWWEKLFNFWGMLNMPK | 49.93 | 32.03 | SWWEKLFNFWGMLNMPK | 52.55 | 45.68 | SWWEKLFNFWGMLNMPK | 56.25 |
| 23 | GWWEKLFNFWGRQNMCA | 88.43  | 24.98 | SWWEKLFNFWGMLNMPK | 49.59 | 31.81 | GWWEKLFNFWGMLNMPK | 52.45 | 45.60 | NWWEKLFNFWGMLNMPK | 56.15 |
| 24 | QWWEKLFNFWGRQNMCA | 87.94  | 24.84 | GWWEKLFNFWGMLNMPK | 49.45 | 31.72 | CWWEKLFNFWGMLNMPK | 52.12 | 45.31 | NWWEKLFNFWGMLNMPK | 55.92 |
| 25 | GWWEKLFNFWGRQNMCA | 87.61  | 24.75 | GWWEKLFNFWGMLNMPK | 49.44 | 31.71 | SWWEKLFNFWGMLNMPK | 51.24 | 44.55 | TWWEKLFNFWGMLNMPK | 55.73 |
| 26 | GWWEKLFNFWGRQNMCA | 87.45  | 24.71 | YWWEKLFNFWGMLNMPK | 49.28 | 31.61 | QWWEKLFNFWGMLNMPK | 51.22 | 44.53 | SWWEKLFNFWGMLNMPK | 55.57 |
| 27 | GWWEKLFNFWGRQNMCA | 86.85  | 24.53 | GWWEKLFNFWGMLNMPK | 49.27 | 31.60 | SWWEKLFNFWGMLNMPK | 50.90 | 44.25 | GWWEKLFNFWGMLNMPK | 55.51 |
| 28 | GWWEKLFNFWGRQNMCA | 86.31  | 24.38 | GWWEKLFNFWGMLNMPK | 48.60 | 31.17 | NWWEKLFNFWGMLNMPK | 50.21 | 43.65 | SWWEKLFNFWGMLNMPK | 54.99 |
| 29 | EWWEKLFNFWGRQNMCA | 86.11  | 24.33 | QWWEKLFNFWGMLNMPK | 48.54 | 31.13 | SWWEKLFNFWGMLNMPK | 50.15 | 43.60 | TWWEKLFNFWGMLNMPK | 54.75 |
| 30 | GWWEKLFNFWGRQNMCA | 84.97  | 24.00 | QWWEKLFNFWGMLNMPK | 48.42 | 31.06 | GWWEKLFNFWGMLNMPK | 49.96 | 43.44 | NWWEKLFNFWGMLNMPK | 54.69 |
| 31 | CWWEKLFNFWGRQNMCA | 83.71  | 23.65 | GWWEKLFNFWGMLNMPK | 48.20 | 30.92 | SWWEKLFNFWGMLNMPK | 49.38 | 42.93 | SWWEKLFNFWGMLNMPK | 54.05 |
| 32 | GWWEKLFNFWGRQNMCA | 83.06  | 23.46 | SWWEKLFNFWGMLNMPK | 48.10 | 30.85 | NWWEKLFNFWGMLNMPK | 49.32 | 42.88 | NWWEKLFNFWGMLNMPK | 53.82 |
| 33 | GWWEKLFNFWGRQNMCA | 82.23  | 23.23 | GWWEKLFNFWGMLNMPK | 48.06 | 30.83 | GWWEKLFNFWGMLNMPK | 48.93 | 42.54 | TWWEKLFNFWGMLNMPK | 53.67 |
| 34 | GWWEKLFNFWGRQNMCA | 81.79  | 23.11 | QWWEKLFNFWGMLNMPK | 47.17 | 30.26 | SWWEKLFNFWGMLNMPK | 48.33 | 42.02 | TWWEKLFNFWGMLNMPK | 52.92 |
| 35 | GWWEKLFNFWGRQNMCA | 81.70  | 23.08 | GWWEKLFNFWGMLNMPK | 46.96 | 30.12 | NWWEKLFNFWGMLNMPK | 48.14 | 41.85 | SWWEKLFNFWGMLNMPK | 52.82 |
| 36 | QWWEKLFNFWGRQNMCA | 81.69  | 23.08 | GWWEKLFNFWGMLNMPK | 46.76 | 29.99 | SWWEKLFNFWGMLNMPK | 48.13 | 41.84 | KWWEKLFNFWGMLNMPK | 52.71 |
| 37 | GWWEKLFNFWGRQNMCA | 81.46  | 23.01 | SWWEKLFNFWGMLNMPK | 46.61 | 29.90 | SWWEKLFNFWGMLNMPK | 47.84 | 41.59 | KWWEKLFNFWGMLNMPK | 51.48 |
| 38 | GWWEKLFNFWGRQNMCA | 80.98  | 22.88 | SWWEKLFNFWGMLNMPK | 46.51 | 29.84 | TWWEKLFNFWGMLNMPK | 47.84 | 41.59 | GWWEKLFNFWGMLNMPK | 51.09 |
| 39 | GWWEKLFNFWGRQNMCA | 80.81  | 22.83 | GWWEKLFNFWGMLNMPK | 46.49 | 29.82 | RWWEKLFNFWGMLNMPK | 47.79 | 41.55 | SWWEKLFNFWGMLNMPK | 51.08 |
| 40 | GWWEKLFNFWGRQNMCA | 79.88  | 22.57 | GWWEKLFNFWGMLNMPK | 46.21 | 29.64 | YWWEKLFNFWGMLNMPK | 47.57 | 41.35 | NWWEKLFNFWGMLNMPK | 51.02 |
| 41 | GWWEKLFNFWGRQNMCA | 79.83  | 22.55 | CWWEKLFNFWGMLNMPK | 45.88 | 29.43 | SWWEKLFNFWGMLNMPK | 47.24 | 41.07 | SWWEKLFNFWGMLNMPK | 50.86 |
| 42 | GWWEKLFNFWGRQNMCA | 79.67  | 22.51 | GWWEKLFNFWGMLNMPK | 45.86 | 29.42 | TWWEKLFNFWGMLNMPK | 46.99 | 40.85 | KWWEKLFNFWGMLNMPK | 50.39 |
| 43 | GWWEKLFNFWGRQNMCA | 79.40  | 22.43 | EWWEKLFNFWGMLNMPK | 45.68 | 29.30 | GWWEKLFNFWGMLNMPK | 46.77 | 40.66 | SWWEKLFNFWGMLNMPK | 50.24 |
| 44 | GWWEKLFNFWGRQNMCA | 79.35  | 22.42 | GWWEKLFNFWGMLNMPK | 45.65 | 29.28 | TWWEKLFNFWGMLNMPK | 46.14 | 40.11 | GWWEKLFNFWGMLNMPK | 50.22 |
| 45 | GWWEKLFNFWGRQNMCA | 79.02  | 22.32 | GWWEKLFNFWGMLNMPK | 45.64 | 29.28 | SWWEKLFNFWGMLNMPK | 45.63 | 39.67 | GWWEKLFNFWGMLNMPK | 50.18 |
| 46 | GWWEKLFNFWGRQNMCA | 78.81  | 22.26 | GWWEKLFNFWGMLNMPK | 45.58 | 29.24 | GWWEKLFNFWGMLNMPK | 45.50 | 39.56 | CWWEKLFNFWGMLNMPK | 49.58 |
| 47 | QWWEKLFNFWGRQNMCA | 78.67  | 22.22 | SWWEKLFNFWGMLNMPK | 45.53 | 29.20 | GWWEKLFNFWGMLNMPK | 45.39 | 39.46 | TWWEKLFNFWGMLNMPK | 49.55 |
| 48 | GWWEKLFNFWGRQNMCA | 78.63  | 22.21 | GWWSKLFNFWGMLNMPK | 45.48 | 29.17 | SWWEKLFNFWGMLNMPK | 45.18 | 39.28 | SWWEKLFNFWGMLNMPK | 49.38 |
| 49 | GWWEKLFNFWGRQNMCA | 78.09  | 22.06 | EWWEKLFNFWGRDAPK  | 45.48 | 29.17 | TWWEKLFNFWGMLNMPK | 45.09 | 39.20 | TWWEKLFNFWGMLNMPK | 49.12 |
| 50 | CWWEKLFNFWGRQNMCA | 77.46  | 21.88 | LWWEKLFNFWGRQNMCA | 45.21 | 29.00 | GWWEKLFNFWGMLNMPK | 43.95 | 38.21 | GWWEKLFNFWGMLNMPK | 49.01 |
| 51 | GWWEKLFNFWGRQNMCA | 77.32  | 21.84 | GWWEKLFNFWGRQNMCA | 44.75 | 28.70 | GWWEKLFNFWGMLNMPK | 43.67 | 37.97 | GWWEKLFNFWGMLNMPK | 48.96 |
| 52 | GWWEKLFNFWGRQNMCA | 77.23  | 21.82 | GWWEKLFNFWGRQNMCA | 44.14 | 28.32 | CWWEKLFNFWGMLNMPK | 42.96 | 37.35 | KWWEKLFNFWGMLNMPK | 48.88 |
| 53 | KWWEKLFNFWGRQNMCA | 77.09  | 21.78 | SWWEKLFNFWGRQNMCA | 43.12 | 27.66 | SWWEKLFNFWGMLNMPK | 42.95 | 37.34 | CWWEKLFNFWGMLNMPK | 48.68 |
| 54 | GWWEKLFNFWGRQNMCA | 76.93  | 21.73 | SWWEKLFNFWGRQNMCA | 43.08 | 27.64 | GWWEKLFNFWGMLNMPK | 42.72 | 37.14 | GWWEKLFNFWGMLNMPK | 48.67 |
| 55 | GWWEKLFNFWGRQNMCA | 76.85  | 21.71 | TWWEKLFNFWGMLNMPK | 42.99 | 27.58 | SWWEKLFNFWGMLNMPK | 42.62 | 37.05 | NWWEKLFNFWGMLNMPK | 48.60 |
| 56 | GWWEKLFNFWGRQNMCA | 76.77  | 21.69 | CWWEKLFNFWGMLNMPK | 42.89 | 27.51 | NWWEKLFNFWGMLNMPK | 42.29 | 36.77 | SWWEKLFNFWGMLNMPK | 48.51 |
| 57 | GWWEKLFNFWGRQNMCA | 76.63  | 21.65 | SWWEKLFNFWGRQNMCA | 42.85 | 27.48 | GWWEKLFNFWGMLNMPK | 42.24 | 36.72 | KWWEKLFNFWGMLNMPK | 47.27 |
| 58 | GWWEKLFNFWGRQNMCA | 76.03  | 21.48 | GWWEKLFNFWGMLNMPK | 42.70 | 27.39 | TWWEKLFNFWGMLNMPK | 42.22 | 36.70 | SWWEKLFNFWGMLNMPK | 47.23 |
| 59 | GWWEKLFNFWGRQNMCA | 75.97  | 21.46 | EWWEKLFNFWGMLNMPK | 42.64 | 27.35 | RWWEKLFNFWGMLNMPK | 42.10 | 36.60 | GWWEKLFNFWGMLNMPK | 47.04 |
| 60 | GWWEKLFNFWGRQNMCA | 75.66  | 21.37 | SWWEKLFNFWGMLNMPK | 42.62 | 27.34 | SWWEKLFNFWGMLNMPK | 41.21 | 36.09 | KWWEKLFNFWGMLNMPK | 46.60 |
| 61 | GWWEKLFNFWGRQNMCA | 75.35  | 21.29 | GWWEKLFNFWGRQNMCA | 42.39 | 27.19 | SWWEKLFNFWGMLNMPK | 41.52 | 35.83 | GWWEKLFNFWGMLNMPK | 46.23 |
| 62 | GWWEKLFNFWGRQNMCA | 75.03  | 21.20 | GWWEKLFNFWGRQNMCA | 42.36 | 27.17 | RWWEKLFNFWGRQNMCA | 40.64 | 35.33 | SWWEKLFNFWGMLNMPK | 45.91 |
| 63 | GWWEKLFNFWGRQNMCA | 74.83  | 21.14 | TWWEKLFNFWGRQNMCA | 42.31 | 27.14 | SWWEKLFNFWGRQNMCA | 40.44 | 35.16 | NWWEKLFNFWGMLNMPK | 45.37 |
| 64 | GWFEKLFNFWGRQNMCA | 74.73  | 21.11 | QWWEKLFNFWGRQNMCA | 42.21 | 27.07 | SWWEKLFNFWGRQNMCA | 40.44 | 35.15 | SWWEKLFNFWGMLNMPK | 45.30 |
| 65 | SWWEKLFNFWGRQNMCA | 74.69  | 21.10 | GWWEKLFNFWGMLNMPK | 41.88 | 26.86 | SWWEKLFNFWGMLNMPK | 40.43 | 35.15 | KWWEKLFNFWGMLNMPK | 44.96 |
| 66 | GWWEKLFNFWGRQNMCA | 74.67  | 21.10 | CWWEKLFNFWGRDNGM  | 41.78 | 26.80 | GWWEKLFNFWGMLNMPK | 39.71 | 34.52 | GWWEKLFNFWGMLNMPK | 44.95 |
| 67 | GWWEKLFNFWGRQNMCA | 74.49  | 21.04 | GWWEKLFNFWGMLNMPK | 41.61 | 26.69 | GWWEKLFNFWGMLNMPK | 39.58 | 34.41 | SWWEKLFNFWGMLNMPK | 44.69 |
| 68 | GWWEKLFNFWGRQNMCA | 74.45  | 21.03 | TWWEKLFNFWGRQNMCA | 41.55 | 26.65 | GWWEKLFNFWGMLNMPK | 39.36 | 34.22 | TWWEKLFNFWGMLNMPK | 44.59 |
| 69 | SWWEKLFNFWGRQNMCA | 74.11  | 20.94 | EWWEKLFNFWGRQNMCA | 41.48 | 26.61 | YWWEKLFNFWGRDNGM  | 39.30 | 34.17 | GWWEKLFNFWGMLNMPK | 44.15 |
| 70 | GWWEKLFNFWGRQNMCA | 73.27  | 20.70 | CWWEKLFNFWGRQNMCA | 41.23 | 26.45 | CWWEKLFNFWGRQNMCA | 39.01 | 33.91 | SWWEKLFNFWGMLNMPK | 44.15 |
| 71 | GWWEKLFNFWGRQNMCA | 73.16  | 20.67 | GWWEKLFNFWGRQNMCA | 41.19 | 26.42 | GWWEKLFNFWGMLNMPK | 3     |       |                   |       |

|     |                   |       |       |                   |       |       |                   |       |       |                  |       |
|-----|-------------------|-------|-------|-------------------|-------|-------|-------------------|-------|-------|------------------|-------|
| 77  | GWWEKLFNWGNMNMHY  | 71,17 | 20,11 | SWWEKLFNWGCVLMHA  | 40,38 | 25,90 | SWWEKLFNVVGNQDPK  | 37,40 | 32,51 | GWWEKLFNWGMNDQHM | 42,39 |
| 78  | GWWEKLFNWGRENGCE  | 70,82 | 20,01 | TWWSKLFNWVGNQDPK  | 40,29 | 25,85 | SWWTKLFNWGCSCQPK  | 37,37 | 32,49 | NWWEKLFNWGRNTQPA | 42,07 |
| 79  | YWWEKLFNWGRQEQPA  | 70,72 | 19,98 | GWWEKLFNWGMNMG    | 39,93 | 25,61 | NWWEKLFNWQRDNMG   | 37,23 | 32,37 | CWWEKLFNWGCQNTHC | 41,39 |
| 80  | GWWEKLFNWGRQDQPK  | 70,63 | 19,95 | GWWEKLFNWGRQDQPK  | 39,93 | 25,61 | GWWEKLFNWGRQDQPK  | 37,22 | 32,35 | NWWEKLFNWGMNDQHM | 41,36 |
| 81  | GWWEKLFNWGRQGGTA  | 70,57 | 19,94 | CWWEKLFNWGMVNMHA  | 39,90 | 25,59 | GWWEKLFNWGMNMAK   | 37,20 | 32,34 | NWWEKLFNWGMNDQHM | 41,32 |
| 82  | GWWEKLFNWGRQOQTA  | 70,34 | 19,87 | GWWEKLFNWVWQNGHN  | 39,81 | 25,53 | YWWEKLFNWGRQOQHM  | 37,15 | 32,30 | NWWEKLFNWVWQDQPK | 40,73 |
| 83  | GWWEKLFNLYCQNPQM  | 69,92 | 19,75 | TWWTKLFNLGCQNPQE  | 39,78 | 25,52 | SWWEKLANWCMNMG    | 36,98 | 32,15 | GWWDKLFNFGCQNPQK | 39,99 |
| 84  | GWWEKLFNWGRQDQPK  | 69,91 | 19,75 | GWWEKLFNLGCQNPQE  | 39,63 | 25,42 | GWWEKLFNSGRQDQPK  | 36,93 | 32,11 | SWWEKLFNWGMNDQHM | 39,85 |
| 85  | GWWEKLFNWGRQNMHF  | 69,88 | 19,74 | EWWEKLFNWGMQNGNG  | 39,56 | 25,38 | SWWSKLFNDGQOQNTL  | 36,62 | 31,84 | GWWEKLFQFGMNDQHM | 39,44 |
| 86  | GWWEKLFQWVGNQOQA  | 69,15 | 19,53 | TWWEKLFNWGCNSQPK  | 39,55 | 25,37 | TWWEKLFYSGRQOQHM  | 36,44 | 31,68 | SWWEKLFQFGMNDQHM | 39,40 |
| 87  | NWWEKLFNWGRQEQPA  | 69,00 | 19,49 | GWWEKLFNWGRQOQTT  | 39,44 | 25,30 | SWWEKLFQGRDNMG    | 36,09 | 31,38 | KWWEKLFNWVWQDQPK | 39,28 |
| 88  | GWWEKLFNWGRQVQPA  | 68,92 | 19,47 | SWWKKLFNWGDLMNHG  | 39,41 | 25,28 | SFWEKLFNWGMNMPK   | 35,94 | 31,25 | GWWEKLFNDGFRNMHG | 38,93 |
| 89  | GWWEKLFNWGMNDGG   | 68,58 | 19,37 | TWWSKLFNWGSQEQPA  | 39,35 | 25,24 | KWWEKLFNWGRNMGV   | 35,87 | 31,18 | GWWEKLFNDGFLNMHG | 38,92 |
| 90  | GWWEKLFNWGLRNGHG  | 68,02 | 19,22 | GWWEKLFWSGMEDQPK  | 39,15 | 25,11 | KWWEKLFNWGRNMGH   | 35,77 | 31,09 | GWWEKLFNWGMNDQHM | 38,90 |
| 91  | SWWEKLFNYGRQOQPA  | 67,36 | 19,03 | QWWEKLFNWGRQEQPA  | 38,90 | 24,95 | KWWEKLFNWGMNMGH   | 35,54 | 30,90 | GWWEKLFNWNMGDQPK | 38,87 |
| 92  | GWWEKLFNLRDNGHG   | 67,26 | 19,00 | GWWEKLLGWGRQOQPA  | 38,77 | 24,87 | TWWEKLFNWGMNMG    | 35,53 | 30,89 | KWWEKLFCDGFLNMHG | 38,64 |
| 93  | GWWEKLFNSGRQOQTA  | 67,08 | 18,95 | GWWEKLFNWGMQNGHG  | 38,30 | 24,57 | LWWEKLFNSGRQDQPK  | 35,45 | 30,82 | LWWEKLFNWGMNDQHM | 38,14 |
| 94  | GWWEKLFNWGRQOQPA  | 66,90 | 18,90 | GWWEKLFNFGCQOQHM  | 37,76 | 24,22 | CWWEKLFNWGMNMGH   | 35,30 | 30,69 | SWWEKLFNFGMNDQHM | 37,54 |
| 95  | GWWEKLFNWGRSNMHH  | 66,43 | 18,77 | CWWEKLFWCGRQOQPK  | 37,64 | 24,15 | CWWEKLFNWGMNDQPK  | 35,20 | 30,60 | GWWEKLFNWVWQDQPK | 36,96 |
| 96  | GWWEKLFNGRQNMHF   | 65,92 | 18,62 | CWWEKLFNWGMQNGHK  | 37,25 | 23,90 | GWWEKLFNGRQEQQA   | 35,07 | 30,49 | GWWEKLFYGCQOQGLG | 36,57 |
| 97  | QWWSKLFNLGCQNPQM  | 65,61 | 18,54 | GWWEKLFNWVGNQOQA  | 36,82 | 23,62 | NWWEKLFDFEQOQHM   | 34,87 | 30,31 | GWWEKLFNWGMNDQHM | 36,26 |
| 98  | GWWEKLFNWGRQNGHG  | 65,55 | 18,52 | FWWEKLFNWGRQNGCG  | 36,55 | 23,45 | YWWEKLFNWGMNMGH   | 34,58 | 30,06 | GWWEKLFYGCQOQGLG | 35,71 |
| 99  | SWWEKLFNWGMNMGH   | 65,12 | 18,40 | TWWEKLFNWGMQNGHG  | 36,36 | 23,32 | SWWEKLFNWGMNMGH   | 34,47 | 29,97 | GWWTKLFNWGMNDQHM | 35,38 |
| 100 | GWWDKLFNWGRQEQPA  | 65,08 | 18,38 | GSWEKLFNWGRDNMG   | 36,31 | 23,29 | GWWEKLFNGCQOQPA   | 34,43 | 29,93 | GWWEKLFNWVWQDQPK | 35,32 |
| 101 | GWWEKLFNWGRQOQPA  | 65,08 | 18,38 | GWWEKLFNWGRQOQPA  | 36,31 | 23,29 | GWWEKLFNWDMEEQPK  | 34,41 | 29,92 | GWWEKLFYGCQOQGLG | 35,02 |
| 102 | GWWEKLFNWGRQOQPA  | 63,92 | 18,06 | GWWEKLFNWGRQEQPA  | 36,30 | 23,28 | DWWEKLFNWGRQDQPK  | 34,08 | 29,62 | GWWEKLFQWDCQOQHM | 34,77 |
| 103 | GWWEKLFNWGMNMGH   | 63,68 | 17,99 | SWWEKLFNWVGNQOQHM | 36,22 | 23,23 | GWWEKLFNWGMNMGH   | 34,06 | 29,61 | GWWEKLFNWGMNDQHM | 34,58 |
| 104 | GWWEKLFNWVGNQOQA  | 63,41 | 17,91 | EWWEKLFNWGRQEQPA  | 36,00 | 23,09 | SWWEKLFNWGMNMGH   | 33,82 | 29,40 | NWWEKLFNWGMNDQHM | 34,52 |
| 105 | GWWEKLFNWGRQDQPK  | 63,01 | 17,80 | QWWEKLFNWGRQOQPA  | 35,09 | 22,51 | KWWEKLFNWGRQOQHM  | 33,03 | 28,72 | GWWDKLFNWGMNDQHM | 34,44 |
| 106 | QWWSKLFNWGRQDQPK  | 62,72 | 17,72 | GWWEKLFNWGRDNMG   | 35,02 | 22,46 | KWWEKLFNWGRQEQQA  | 32,95 | 28,65 | GWWEKLFQGCQOQGLG | 34,21 |
| 107 | GWWEKLFNWGRQOQTA  | 62,44 | 17,64 | QWWEKLFNWGRQNGCG  | 34,82 | 22,33 | GWWDKLFNWGMNMGH   | 32,92 | 28,62 | GWWEKLFYGCQOQGLG | 33,81 |
| 108 | GWWEKLFNWGRQOQTA  | 62,30 | 17,60 | GWWEKLFNWGRQOQHM  | 34,71 | 22,27 | GWWEKLFNWGRQOQHM  | 32,31 | 28,09 | GWWEKLFNWGMNDQHM | 33,66 |
| 109 | GWWEKLFNLGCQNPQM  | 61,90 | 17,49 | SWWEKLFNWVGRQOQA  | 34,27 | 21,98 | TWWEKLFNWGMNMGH   | 32,14 | 27,94 | GWWEKLFNFGMNDQHM | 33,53 |
| 110 | GWWEKLFNWVGNQOQA  | 61,75 | 17,44 | RWWEKLFNWGRQNGHG  | 34,24 | 21,96 | SWWEKLFNWGRQOQHM  | 32,01 | 27,83 | SWWEKLFNWGRQOQPA | 33,49 |
| 111 | GWWEKLFNWGRQOQPA  | 61,24 | 17,30 | GWWEKLFNWGRQOQPA  | 34,16 | 21,91 | SWWEKLFNWGRQOQHM  | 31,89 | 27,73 | SWWEKLFNWGRQOQPK | 33,33 |
| 112 | GWWEKLFNWGMNMGH   | 61,22 | 17,29 | GWWEKLANWGRQOQHM  | 34,07 | 21,86 | GWWEKLFNWGMNMGH   | 31,01 | 26,96 | CWWEKLFNWGMNDQPK | 33,32 |
| 113 | DWWEKLFNWGMNMGH   | 60,90 | 17,20 | GWWEKLFNWGMNMGH   | 33,96 | 21,79 | NAWWEKLFNWGMNMGH  | 30,91 | 26,87 | DWWEKLFNWGMNDQPK | 33,31 |
| 114 | AWWEKLFNAGRSNMHG  | 60,79 | 17,17 | GWWEKLFNWGRDNMG   | 33,92 | 21,76 | SWWEKLFNWGRQOQPK  | 30,81 | 26,79 | DWWEKLFNFGMNDQHM | 33,21 |
| 115 | QWWEKLFNAGRSNMHG  | 60,38 | 17,06 | GWWEKLFNWGMNMGH   | 33,58 | 21,54 | SWWEKLFNWGMNMGH   | 30,80 | 26,77 | EWWEKLFNWGRQOQPA | 33,11 |
| 116 | GWWEKLFNWGRQOQPA  | 60,11 | 16,98 | CWWEKLFNWGRQOQPK  | 33,58 | 21,54 | GWWEKLFNWGRQOQPA  | 30,56 | 26,57 | KWWDKLFNWGMNDQPK | 33,02 |
| 117 | GWWEKLFNWGRQOQPA  | 59,94 | 16,93 | SWWEKLFNWGMNMGH   | 33,31 | 21,37 | SWWEKLFNWVGNQOQA  | 30,47 | 26,49 | LWWEKLFNWGMNDQPK | 33,00 |
| 118 | GWWEKLFNWGRQEQPA  | 59,88 | 16,92 | GWWEKLFNWGRQEQPA  | 33,23 | 21,32 | SSWEKLFNWGMEDQPK  | 30,32 | 26,36 | KWWEKLFYGCQOQGLG | 32,92 |
| 119 | GWWEKLFNWGRQOQTA  | 59,84 | 16,91 | GWWEKLFNWGRQOQTA  | 32,88 | 21,09 | YWWEKLFNWGRQOQHM  | 30,27 | 26,32 | GWWEKLFNWGMNDQHM | 32,13 |
| 120 | GWWEKLFNAGMNDGG   | 59,63 | 16,85 | GWWEKLFNWGRDNMG   | 31,97 | 20,51 | SWWEKLFNWGRQOQHM  | 30,25 | 26,30 | GWWEKLFNFGMNDQHM | 31,23 |
| 121 | GWWEKLFNWGRQOQPK  | 59,01 | 16,67 | GWWEKLFWCGRQOQPK  | 31,72 | 20,34 | NWWEKLFNWGMNMGH   | 30,22 | 26,27 | SWWEKLFYGCQOQGLG | 30,76 |
| 122 | RWWEKLFNWGRQOQTA  | 58,95 | 16,65 | GWWEKLANWGRQEQPA  | 31,45 | 20,17 | MLWEKLFNFGCQOQHM  | 30,14 | 26,20 | GWWDKLFNWGMNDQHM | 30,09 |
| 123 | GWWEKLFNWGRDNMG   | 58,72 | 16,59 | SWWTKLFNWGRQOQPA  | 31,28 | 20,06 | KWWEKLFNFGCQOQHM  | 30,11 | 26,17 | GWWDKLFNWGMNDQHM | 30,05 |
| 124 | GWWEKLFNWGMNMGH   | 57,74 | 16,31 | GWWEKLFNWGRQOQPA  | 31,19 | 20,01 | GWWDKLFNWGRQOQPK  | 30,08 | 26,15 | CWWEKLFNWGMNDQHM | 29,56 |
| 125 | GWWEKLFNWGRQOQTA  | 57,13 | 16,14 | GWWEKLFNWGMQNGHG  | 31,10 | 19,95 | SWWEKLFNWGRQOQHM  | 29,98 | 26,06 | KWWEKLFNWGMNDQHM | 29,52 |
| 126 | GWWEKLFNWGRQEQPA  | 57,01 | 16,10 | TWWEKLFNWGRQOQHM  | 31,01 | 19,89 | KWWEKLFNWGMNMGH   | 29,83 | 26,06 | SWWDKLFNWGMNDQPK | 29,17 |
| 127 | CWWEKLFNWGRDNMG   | 55,29 | 15,62 | GWWNKLFNFGCQOQHA  | 30,99 | 19,88 | GWWEKLFNWGRQEQQA  | 29,46 | 25,61 | GWWEKLFNWGRQOQHM | 28,53 |
| 128 | GWWEKLFNWGMNMGH   | 54,76 | 15,47 | QWWEKLFNWGRQOQPA  | 30,85 | 19,79 | KWWEKLFNWGRQOQHM  | 29,05 | 25,26 | GFWEKLFNWGMNDQPK | 28,52 |
| 129 | GWWDKLFNWGRQOQTA  | 54,64 | 15,43 | QWWEKLFNWGRQOQPA  | 30,57 | 19,61 | YWWEKLFNWGRQOQHM  | 28,76 | 25,00 | SWWTKLFNWGRQOQPK | 28,19 |
| 130 | SWWEKLFNWGRQOQPA  | 54,14 | 15,30 | EWWEKLFNWGRQEQPA  | 29,36 | 18,83 | GWWEKLFNWGRQOQPK  | 28,01 | 24,35 | GWWEKLFNWGMNDQHM | 27,87 |
| 131 | SWWEKLFNWGRQOQPA  | 54,01 | 15,26 | CWWEKLFNWGRQOQPK  | 29,19 | 18,73 | GWWEKLFNWGRQOQHM  | 27,24 | 23,68 | SWWEKLFNWGRQOQHM | 27,59 |
| 132 | GWWEKLFNWGRQOQTA  | 53,57 | 15,13 | TWWEKLFNFGCQOQHM  | 28,95 | 18,57 | GWWEKLFNWGMNMGH   | 26,88 | 23,37 | SWWDKLFNWGMNDQPK | 27,35 |
| 133 | GWWEKLFNAGRSNMHG  | 51,93 | 14,67 | GWWEKLFNFGCQOQPK  | 28,68 | 18,39 | KWWEKLFNWGRQOQHA  | 26,31 | 22,87 | KWWEKLFYGCQOQGLG | 27,10 |
| 134 | SWWEKLFNWGMNMGH   | 51,09 | 14,43 | GWWEKLFNWGRQOQPK  | 28,08 | 18,01 | GWWEKLFNWGRQOQHM  | 26,02 | 22,62 | SWWEKLFNWGMNDQHM | 26,86 |
| 135 | GWWEKLFNGRQNMHF   | 50,69 | 14,32 | QWWEKLFNWGMQNGHG  | 27,92 | 17,91 | GWWEKLFNWGRQOQPK  | 26,00 | 22,60 | NWWEKLFNFGCQOQHM | 26,75 |
| 136 | GWWEKLFNLAGCQNPQM | 50,66 | 14,31 | GWWEKLFNWGMNDGG   | 27,89 | 17,89 | GWWEKLFNWGMEDQPK  | 25,62 | 22,27 | TWWEKLFNWGMNMGH  | 26,40 |
| 137 | GWWEKLFNLAGCQNPQM | 50,54 | 14,28 | EWWDKLFNWGRQOQPK  | 27,39 | 17,57 | CWWEKLFNFGCQOQHM  | 25,56 | 22,22 | GWWEKLFNWGMNDQHM | 25,90 |
| 138 | GWWEKLFNWGRQOQPA  | 49,95 | 14,11 | SWWEKLFNWGRQOQPK  | 27,13 | 17,40 | DWWEKLFNWGRQOQHM  | 24,44 | 21,24 | YWWEKLFNWGMNDQHM | 25,67 |
| 139 | GWWEKLFNWGRQOQHM  | 49,81 | 14,07 | DWWEKLFNWGRQOQPA  | 26,98 | 17,31 | GWWEKLFNWGRQOQPK  | 24,42 | 21,23 | KWWEKLFNWGMNDQPK | 25,55 |
| 140 | YWWEKLFNWGMNMGH   | 49,60 | 14,01 | SWWTKLFNWGRQOQTA  | 26,96 | 17,29 | GAWEKLFNWGRQOQHM  | 23,92 | 20,80 | GWWEKLFNWGRQOQHM | 25,05 |
| 141 | GWWEKLFNWGRQOQHM  | 49,10 | 13,87 | EWWEKLFNWGRQOQPA  | 26,77 | 17,17 | GWWEKLFNFGCQOQHM  | 23,82 | 20,70 | NWWEKLFNWGMNDQHM | 24,56 |
| 142 | GWWEKLFNWGRQOQPA  | 47,53 | 13,43 | QWWSKLFNWGRQOQPA  | 25,25 | 16,20 | RWWEKLFNWGRQOQPK  | 23,16 | 20,14 | SWWEKLFNWGRQOQPK | 23,97 |
| 143 | QWWEKLFNWGRQOQTA  | 47,01 | 13,28 | GWWNKLFNFGCQOQHM  | 25,18 | 16,15 | NWWEKLFNWGRQOQHM  | 22,77 | 19,79 | KWWEKLFNFGMNDQPK | 23,76 |
| 144 | GWWEKLFNWGRQEQPA  | 46,94 | 13,26 | GDWEKLFNWGRQOQHM  | 24,80 | 15,91 | QWWEKLFNWGMNMGH   | 22,50 | 19,56 | GWWEKLFYGCQOQGLG | 23,15 |
| 145 | SWWEKLFNWGRQOQPA  | 46,59 | 13,16 | EWWEKLFNWGMNMGH   | 23,11 | 14,82 | NAWWEKLFNWGMNMGH  | 22,19 | 19,29 | GWWEKLFNWGRQOQHM | 22,66 |
| 146 | GWWEKLFNWGRQOQPK  | 46,30 | 13,08 | EWWEKLFNWGRQEQPA  | 22,62 | 14,51 | GWWEKLFNFGCQOQHM  | 21,43 | 18,63 | GWWDKLFNFGCQOQHA | 22,59 |
| 147 | DWWEKLFNWGRQOQPK  | 45,83 | 12,95 | SWWEKLFNWGRQEQPA  | 22,07 | 14,16 | SWWEKLFNWGMNMGH   | 21,12 | 18,36 | SWWEKLFNWGMNDQPK | 22,21 |
| 148 | GWWEKLFNWGRQOQPA  | 44,30 | 12,52 | GDWEKLFNWGRQEQPA  | 21,19 | 13,59 | KTWEKLFNFGCQOQHM  | 20,84 | 18,11 | SWWEKLFNFGMNDQHM | 21,98 |
| 149 | GWWSKLFNWGRQNMHA  | 44,17 | 12,48 | EKWEKLFNWGRDNMG   | 21,12 | 13,55 | CRWEKLFNWGMNMGH   | 20,24 | 17,60 | SAWEKLFNFGMNDQHM | 21,58 |
| 150 | GWWEKLFNWGRQOQHM  | 43,74 | 12,36 | GWWEKLFNWGMNMGH   | 20,61 | 13,22 | SWWTKLFNWGRQOQPA  | 20,22 | 17,58 | TEWEKLFNWGRQOQPK | 21,31 |
| 151 | GWWEKLFNWGRQOQPA  | 43,32 | 12,24 | GWWEKLFNWGRQOQHM  | 20,15 | 12,92 | GWWEKLFNFGCQOQHM  | 19,92 | 17,31 | GWWEKLFNWGMNDQHM | 21,21 |
| 152 | GWWEKLFNLAGCQNPQM | 42,68 | 12,06 | GWWEKLFYFGRQOQPA  | 19,84 | 12,73 | RTWEKLFNWGRQOQHM  | 19,66 | 17,09 | TWWDKLFNWGMNDQHM | 20,97 |
| 153 | SWWEKLFNWGRQOQTA  | 40,63 | 11,48 | GWWEKLFNWGRQOQHM  | 19,59 | 12,57 | TWWEKLFNWGRQEQQA  | 19,54 | 16,99 | GNWEKLFNWGRQOQHA | 20,93 |
| 154 | GWWEKLFNWGRQOQHM  | 40,48 | 11,44 | GWWEKLFNWGRQOQPK  | 19,35 | 12,41 | TWWEKLFNWGRQOQHM  | 19,31 | 16,79 | GWWEKLFNWGMNDQPK | 20,68 |
| 155 | QWWDKLFNWGRQOQTA  | 39,65 | 11,20 | GWWEKLFNWGRQOQPA  | 19,12 | 12,26 | GAWEKLFNWGRDNMG   | 17,74 | 15,42 | EWWEKLFNWGMNDQHA | 20,17 |
| 156 | GSWEKLFNWGRQOQHM  | 39,45 | 11,15 | EWWEKLFNWGCNSQPK  | 17,85 | 11,45 | SAWEKLFNWGCSCQPK  | 17,00 | 14,78 | CWWEKLFNWGMNDQHM | 19,03 |
| 157 | GWWEKLFNWGRQOQHM  | 39,34 | 11,11 | GWWEKLFNWGRQEQQA  | 17,71 | 11,36 | GWWEKLFNWVGNQOQA  | 16,79 | 14,59 | AWWNYFNDGQOQHM   | 18,06 |
| 158 | SSWEKLFNWGRQOQPA  | 36,57 | 10,33 | GWWEKLFNWGRQOQPK  | 17,25 | 11,06 | TWWEKLFNFGCQOQHM  | 16,57 | 14,40 | NWWEKLFNWGMNDQHM | 16,78 |
| 159 | GWWEKLFNWGRQOQPK  | 36,43 | 10,29 | GWWEKLFNWGMNMGH   | 16,99 | 10,90 | YWWEKLFNWGRQOQHM  | 16,55 | 14,39 | GWWTNLENNRQOQPK  | 16,74 |
| 160 | GWWEKLFNWGRSNMHH  | 35,55 | 10,04 | GWWEKLFWCGRQOQPK  | 16,13 | 10,34 | GWWEKLFNFGCQOQHM  | 16,35 | 14,21 | VWWEKLFNWGMNDQPK | 15,73 |
| 161 | GWWEKLFNAGRSNMHTA | 35,08 | 9,91  | SWWEKLFNWGRQOQPK  | 13,79 | 8,85  | SEWEKLFNWGMNMGH   | 16,11 | 14,01 | NWWEKLFNWGMNDQHM | 15,46 |
| 162 | GWWEKLFNWGRQOQHM  | 29,30 | 8,28  | TWWEKLFNFGCQOQPA  | 13,13 | 8,42  | SWWEKLFNWVYVQDQPK | 15,99 | 13,90 | GWWEKLFNDGFLNMHG | 15,22 |
| 163 | GWWEKLFNWGRQOQPK  | 29,25 | 8,26  | QWWEKLFNFGCQOQPA  | 13,09 | 8,39  | RWWEKLFNWGRQOQPA  | 15,79 | 13,73 | GWWDKLFNAGMNDQHA | 14,62 |
| 164 | GWWEKLFNWGRQOQPA  | 29,17 | 8,24  | GWWEKLFNLAGCQNPQM |       |       |                   |       |       |                  |       |

|     |                       |          |          |                       |          |          |                       |          |          |                       |          |
|-----|-----------------------|----------|----------|-----------------------|----------|----------|-----------------------|----------|----------|-----------------------|----------|
| 173 | GRWEKLFNWGRQNGHG      | 19.98    | 5.64     | SWWEKGFNWGCSNQPK      | 10.87    | 6.97     | GWNEKLFNWGMLNMHG      | 8.32     | 7.23     | GWWDKSFNWYQCNLTL      | 6.98     |
| 174 | GWWEVLFNWSRQEQPA      | 18.58    | 5.25     | GWYEKLFWDGMDNGMG      | 10.32    | 6.62     | SWWEKCFNWRGRGVMG      | 7.29     | 6.33     | CWWEKLNWNMGVAQST      | 6.19     |
| 175 | GWWEKRFNWGMLNMHG      | 16.90    | 4.77     | GWQEKLFNWGRQOQPK      | 10.25    | 6.58     | CWWEKMFNWGCSEQPK      | 6.33     | 5.50     | GWWEKAFNWGMNDQHM      | 5.70     |
| 176 | GWWEVLFNWSRQEQPA      | 16.50    | 4.66     | GWWEKGFNWGRDNGHM      | 10.14    | 6.50     | TWWEKSFNWGVDNMG       | 6.32     | 5.49     | CMWEKLFNYYGGQNGR      | 4.96     |
| 177 | GWWEKMFNWGMLNMHG      | 13.08    | 3.70     | GWKEKLFNWGMLNMHG      | 9.65     | 6.19     | GWQDKLFNWGCSOQPK      | 6.16     | 5.35     | GWWEKFNWGMQOQPK       | 4.89     |
| 178 | SWWEKLFNWGRDNGHG      | 12.87    | 3.63     | GWWFKRFNWGMLNMGG      | 9.52     | 6.11     | SWGEKLFNVVKQNGHN      | 5.71     | 4.96     | GWWEKFSNQGMMDSPPK     | 4.56     |
| 179 | SWNEKLFNWGRQFQCA      | 11.89    | 3.36     | GWYKMFNWGRQEQPA       | 8.10     | 5.20     | CFSEKLFQWGMNDHD       | 5.57     | 4.84     | KWKEKFFNWGMQNGHN      | 4.56     |
| 180 | GWKEKLFNWGRQFQPA      | 11.47    | 3.24     | CWWEKMFNWGMLNMHG      | 6.39     | 4.10     | RWWEKLSNREGRQOQPA     | 5.36     | 4.66     | TWYKLENFNFGSQNGHN     | 4.40     |
| 181 | GWGEKLFNWGRQOQPA      | 10.86    | 3.07     | GWWEVEFNWGMMLNMHG     | 6.32     | 4.05     | DWWEKRFNWGRDNGMG      | 5.18     | 4.50     | YWWEKLFNWGAQNCPP      | 4.32     |
| 182 | SWWEKQFNWGRQOQPA      | 9.00     | 2.54     | SWNEKLFNWVQOQPA       | 6.14     | 3.94     | TWWEKFFNWGRQOQPA      | 4.90     | 4.26     | KWWEKAFNDVMDQOQPK     | 4.21     |
| 183 | GWEDYLFNWGALYVHQ      | 8.89     | 2.51     | EWGEKLFNWGRQFQDA      | 5.89     | 3.78     | CWWELEFNWGMMLNMPK     | 4.67     | 4.06     | NWGMRLFNWGMNDMMG      | 4.08     |
| 184 | GWWEKDFNWGRQNMHG      | 7.94     | 2.24     | QWWEKLFNWVQOQPA       | 5.60     | 3.59     | SWTEKLVNWGYQDQPK      | 4.53     | 3.93     | SWWQKRFNWGMQOQPK      | 4.02     |
| 185 | GWWEKDFNWMLNMHM       | 6.83     | 1.93     | GWNEKLFNWGCSNQPK      | 4.87     | 3.12     | DWWEKLNWNWRQOQDA      | 3.85     | 3.35     | TWWEKLFNWGCQOQHM      | 3.25     |
| 186 | GMWEKLFNWGRSNMHH      | 6.27     | 1.77     | EWKEKLFNWGCVMNHA      | 4.66     | 2.99     | GWWEKFFNWGCQNMTL      | 3.79     | 3.30     | NWWDKLFNWGMEDQLK      | 3.03     |
| 187 | CWWEKLCNKGQNGHG       | 5.77     | 1.63     | CLWKEKRFNWGRQOQHA     | 4.26     | 2.73     | TWWEKFFNWGRQOQDA      | 3.77     | 3.27     | GWWEKFTNDGMMDSPPK     | 3.02     |
| 188 | GWWEKMFNWVQOQPA       | 5.39     | 1.52     | GWWEKLNNGGRQOQPA      | 4.11     | 2.63     | KWNNKEEMWGMKMLV       | 2.82     | 2.45     | CWDEKLFNWGLDQSK       | 2.62     |
| 189 | CWNEKLFNWVQOQPA       | 5.00     | 1.41     | TWWRKLFNWTCQVQPK      | 3.01     | 1.93     | RWCVKTFSLGRQDQPT      | 2.48     | 2.15     | SWWEKDFNWGMNDQPK      | 1.96     |
| 190 | RGSCKLFNWGRGEGCG      | 3.17     | 0.89     | EWNEKLFNWGRDNGMG      | 2.54     | 1.63     | GWWEKTFNWGMMDQPK      | 2.32     | 2.01     | SWWEKMFNWGMQNGHM      | 1.88     |
| 191 | GWQFMFNWGMCMEM        | 2.17     | 0.61     | GWQKLFNLGCVRMHA       | 2.48     | 1.59     | GWWEKTFNDGRDNGMG      | 2.04     | 1.77     | SWEKLFNWGMMDQPK       | 1.88     |
| 192 | GWQEKRFNLGNLNQPA      | 2.12     | 0.60     | GWDEKLFNWGMQNGLG      | 1.65     | 1.06     | TKWEKRFCTCMMDRAK      | 1.95     | 1.69     | TWWEKLNLFVGAQNCMA     | 1.49     |
| 193 | GTCEKLLNVGLVYMG       | 1.86     | 0.53     | MQWEKVFVKGVQNGCG      | 1.52     | 0.97     | GYTEKLFNWGMMLNMG      | 1.78     | 1.55     | KWEEQLFQWGYQDQPK      | 1.48     |
| 194 | GWWEKLFNWGRSNMHH      | 1.64     | 0.46     | TRWEKLFNWGMQNGHG      | 1.45     | 0.93     | NKWEKLFNAGMEDQTL      | 1.21     | 1.05     | GWWEKLNWGAQOQPK       | 1.42     |
| 195 | GWNEKLFNWGRQOQPK      | 1.09     | 0.31     | GWGEKLFNWGMQNGHG      | 1.06     | 0.68     | VWDKSFNFQOQVQHM       | 1.11     | 0.96     | GWWEKLFNWGMDSPPK      | 1.32     |
| 196 | QWWEKAMSGRQDQST       | 0.67     | 0.19     | GWWEKEFNWGMQNGHN      | 0.87     | 0.56     | TRWEKANWGMMLNMPF      | 0.86     | 0.74     | TDWEKLFNWGCQOQPK      | 1.20     |
| 197 | QWNEKTFNWGRQTVED      | 0.50     | 0.14     | SWWEKSCNWGRQOQEA      | 0.26     | 0.16     | KQEFFLMRDSMLNMHG      | 0.39     | 0.34     | TWWEKDTNWGCQNGHN      | 0.76     |
| 198 | CYWEKLNLFGRMNGCN      | 0.45     | 0.13     | EWDEKSFNWGRQOQPA      | 0.21     | 0.13     | TWDETLFNSGRQDQPK      | 0.16     | 0.14     | KWCEKLFNDGFLNCPA      | 0.55     |
| 199 | GWWEKLFKACQAVQTC      | 0.26     | 0.07     | CWWEKDFNWGMQNGHG      | 0.19     | 0.12     | GWWDKSFNVCQOQMSM      | 0.14     | 0.12     | NWWEKLFNWGMQOQPK      | 0.35     |
| 200 | QGTTEKLSNMYRQOQPA     | 0.16     | 0.04     | VECEKFEWTRQEQNA       | 0.07     | 0.04     | SLCEKLFNLQGMNDTQ      | 0.03     | 0.03     | QOTDRLQAWGMEQSTK      | 0.08     |
|     | <b>Lead from Gen6</b> | <b>x</b> | <b>c</b> | <b>Lead from Gen7</b> | <b>x</b> | <b>c</b> | <b>Lead from Gen8</b> | <b>x</b> | <b>c</b> | <b>Lead from Gen9</b> | <b>x</b> |
|     | GWWEKLFNWGMLNMHG      | 120.47   | 34.03    | TWWEKLFNWGRQEQPA      | 58.55    | 37.56    | GWWDKLFNFGCQOQHM      | 52.83    | 45.93    | SWWEKLNWFVQOQPA       | 73.57    |
|     | GWWEKLFNWGMLNMGG      | 108.32   | 30.60    | GWWEKLFNFGCQOQHM      | 52.98    | 33.99    | NWWEKLFNWGMEDQLK      | 50.60    | 43.99    | SWWEKLFNWGMQOQPK      | 66.76    |
|     | GWWEKLFNWGMQNGHG      | 102.86   | 29.06    | SWWEKLFNWGMLNMHG      | 51.34    | 32.93    | TWWEKFFNWGMMDQPK      | 49.71    | 43.22    | NWWEKLFNWGMNDQHM      | 66.27    |
|     | GWWEKLFNWGRSNMHH      | 102.72   | 29.02    | GWWEKLFNWGMMLNMG      | 50.88    | 32.64    | KWWEKLFNWGMLNMHG      | 48.42    | 42.10    | SWWEKLFNWGMQOQPK      | 64.80    |
|     | QWWEKLFNWGRQOQPA      | 96.41    | 27.24    | GWWEKLFNLGCOQOQPK     | 46.66    | 29.93    | GWWEKLFNFGCQOQHM      | 47.31    | 41.13    | KWWEKLFNDGFLNMG       | 62.89    |
|     | GWWEKLFNWGRDNGHG      | 93.71    | 26.47    | QWWEKLFNWGRQOQPA      | 45.64    | 29.28    | GWWEKLFNWGMQOQPK      | 47.23    | 41.06    | GWWEKLFNWGMQOQPK      | 62.26    |
|     | GWWEKLFNWGRQOQPA      | 88.02    | 24.87    | SWWEKLFNWGRQOQPA      | 45.57    | 29.23    | GWWEKLFNWGMMLNMG      | 46.57    | 40.49    | SWWEKLFNWGCQOQPK      | 59.69    |
|     | CWWEKLFNWGRQNGCG      | 86.07    | 24.32    | SWWEKLFNWGRQDQPK      | 45.27    | 29.04    | SWWEKLFNWGRQOQPK      | 42.75    | 37.17    | GWWEKLFNWGMDSPPK      | 58.11    |
|     | GWWEKLFNWGRQOQPA      | 84.76    | 23.95    | SWWEKLFNWVQOQPA       | 43.46    | 27.88    | GWWEKLFNFGCQNMTL      | 42.59    | 37.03    | GWWDKLFNFGCQOQHM      | 54.15    |
|     | GWWEKLFNWGRQFQPA      | 84.50    | 23.87    | CWWEKLFNWGMQNGHG      | 42.82    | 27.47    | SWWEKLFNFGMCOQNGHN    | 42.43    | 36.89    | KWWEKLFNWGMMDQPK      | 52.79    |
|     | GWWEKLFNWGRSNMHH      | 77.39    | 21.86    | GWWEKLFNWGRQOQPA      | 42.39    | 27.19    | SWWEKLFNWGRDNGMG      | 42.03    | 36.54    | TWWEKLFNWGMQOQPK      | 52.74    |
|     | GWWEKLFNLGCOQOQPK     | 69.17    | 19.54    | GWWEKLFNWGMEDQPK      | 42.23    | 27.09    | RWWEKLFNWGMQOQPK      | 41.84    | 36.38    | GWWEKLFNWVMDQOQPK     | 47.55    |
|     | GWWEKLFNWGCNMHA       | 67.82    | 19.16    | GWWEKLFNWGYQDQPK      | 41.43    | 26.58    | CWWEKLFNWGMLNKH       | 41.34    | 35.94    | TWWEKLFNWGMQOQPK      | 45.33    |
|     | GWWEKLFNWGRDQOQPK     | 63.63    | 17.98    | GWWEKLFNWGRQFQDA      | 40.58    | 26.03    | GWWEKFFNWGCQOQHM      | 38.66    | 33.61    | GWWEKLFYVQOQNGG       | 44.99    |
|     | SWWEKLFNWVQOQPA       | 62.84    | 17.75    | EWWEKLFNWGRDNGMG      | 40.21    | 25.79    | DWWEKLFNWGRQDQPK      | 38.62    | 33.58    | TWWEKLFNWGMQOQPK      | 44.96    |
|     | GWWEKLFNWGRQEQPA      | 62.81    | 17.74    | GWWEKLFNWGRQNGCG      | 40.16    | 25.76    | SWWEKLFNWGRQOQPA      | 38.36    | 33.35    | SWWEKLFNWGMQOQHM      | 43.66    |
|     | GWWEKLFNWGRQDQPK      | 62.51    | 17.66    | GWWEKLFNWGCSNQPK      | 39.82    | 25.54    | TWWEKLFNWGRDNGMG      | 38.18    | 33.19    | GWWDKLFNWGCQOQHM      | 40.74    |
|     | GWWEKLFNWGRQEQPA      | 61.69    | 17.43    | EWWEKLFNWGMLNMHG      | 38.90    | 24.95    | CWWEKLFNWGCSCQPK      | 36.50    | 31.73    | CWWEKLFNWGLDQSK       | 39.11    |
|     | SWWEKLFNWGRQOQPA      | 53.62    | 15.15    | GWWEKLFNWGRDNGHM      | 35.05    | 22.48    | SWWEKLFNWGMMLNMPK     | 35.58    | 30.93    | SWWEKLFNWGMQOQPK      | 38.71    |
|     | GWWEKLFNWGRQNGHG      | 53.19    | 15.03    | GWWEKLFNWGCVMNHA      | 34.89    | 22.38    | TWWEKLFNSGRQDQPK      | 34.42    | 29.92    | GWWEKLFQWGMQOQPK      | 37.85    |
|     | GWWEKFFNWGMLNMHG      | 49.06    | 13.86    | GWWEKLFNWGRQOQPA      | 33.88    | 21.73    | GWWEKLNWNWRQOQPA      | 33.74    | 29.33    | NWWEKLFNWGMENMNL      | 36.77    |
|     |                       |          |          | GWWEKLFNWGMQNGHG      | 33.81    | 21.69    | SWWEKLVNWGYQDQPK      | 30.04    | 26.12    | GWWEKLFNWGMQNGHN      | 35.55    |
|     |                       |          |          | CWWEKLFNWGRQOQPA      | 33.31    | 21.37    | SWWEKLFNFGCQOQHM      | 29.14    | 25.33    | GWWDKLFNWGMEDQLK      | 33.84    |

## D-peptide sequences

|    | Generation 1      | x     | c    | Generation 2      | x      | c    | Generation 3      | x     | c    | Generation 4      | x     | c    |
|----|-------------------|-------|------|-------------------|--------|------|-------------------|-------|------|-------------------|-------|------|
| 1  | tnhylqwfagparhfd  | 83.25 | 0.60 | tnhykwfwgqlerkd   | 205.07 | 1.25 | tnhyllwfwagqlerkd | 33.35 | 3.78 | asqrlqwfagalrkl   | 23.48 | 5.00 |
| 2  | epqrltwfwgqlerkd  | 69.63 | 0.50 | apqrlqwfagalrrfd  | 196.67 | 1.20 | tnqrlqwfagalrhyf  | 31.88 | 3.61 | tnkewifagalrkyf   | 19.36 | 4.12 |
| 3  | apqrlqwfagalcrwv  | 67.18 | 0.48 | apqrlqwfagalrrfd  | 165.11 | 1.01 | ecqrlqwfagalrhyf  | 29.77 | 3.37 | tnkwnwfwagalrhyf  | 15.83 | 3.37 |
| 4  | apqrlqwfalfdhna   | 65.51 | 0.47 | epqrltwfwgqlrhd   | 157.06 | 0.96 | asqrlqwfagalrhyf  | 28.45 | 3.22 | tnqrlqwfagalrhyf  | 15.58 | 3.32 |
| 5  | hkprlewfwagplrqfy | 59.21 | 0.43 | lgrlctcfwagqlerkd | 133.46 | 0.81 | vgqkwnfyfclcrwv   | 21.68 | 2.45 | tnnrlqwfagalwhfh  | 15.49 | 3.30 |
| 6  | ligtqlwfwagplrrfd | 55.71 | 0.40 | tnhyllwfwagparhfd | 127.89 | 0.78 | tnkknwfyfclcrwv   | 19.50 | 2.21 | qnhylwfwagalrhd   | 15.36 | 3.27 |
| 7  | drhrlqwfagplrrfd  | 48.88 | 0.35 | tnhylqwfagparhfd  | 112.72 | 0.68 | lnhyllwfwagparhfd | 16.72 | 1.89 | tnwylwfwagalrhyf  | 15.27 | 3.25 |
| 8  | tnhyewfwagplrrfd  | 46.96 | 0.34 | anhyllqwfagplrrfd | 110.86 | 0.69 | tnhyllwfwagparhfd | 16.72 | 1.89 | aqwllqwfagalrhyf  | 14.83 | 3.16 |
| 9  | aplllqwfagplrrfd  | 46.47 | 0.33 | tnhyllwfwagparhfd | 109.05 | 0.67 | telyewfwagplrrfd  | 15.94 | 1.80 | vgskwnfwagalrhyf  | 14.71 | 3.13 |
| 10 | apqrlqwfagplrrfd  | 46.20 | 0.33 | elvrwswfwagplrrfd | 108.87 | 0.66 | tnkllwfwagplrrfd  | 15.68 | 1.77 | tnhyllwfwagalrhyf | 14.55 | 3.10 |
| 11 | dhqrlqwfagplrrfd  | 45.91 | 0.33 | epqrlqwfalftdnah  | 108.64 | 0.66 | ppqrlqwfagalrhyf  | 15.28 | 1.73 | tnkwnwfwagalrhyf  | 14.39 | 3.06 |
| 12 | apqrlqwfagalrhd   | 45.72 | 0.33 | tnhylqwfagparhfd  | 103.16 | 0.63 | apqrlqwfagplrrfd  | 15.09 | 1.71 | tnhyllwfwagalrhyf | 14.20 | 3.02 |
| 13 | lrglqwfagalrrfd   | 45.60 | 0.33 | apqrlqwfagalcrwv  | 102.27 | 0.62 | cthyllwfwagalrhd  | 14.54 | 1.65 | tnhyllwfwagalrhyf | 13.46 | 2.87 |
| 14 | plfglqwfagplrrfd  | 44.15 | 0.32 | ppqrlqwfagalrhyf  | 101.55 | 0.62 | ltrlrtifagalcrwv  | 14.44 | 1.63 | tnqrlqwfagalrhyf  | 13.25 | 2.82 |
| 15 | frgisdifwagplrrfd | 44.08 | 0.32 | apqhnwlymalqlwfw  | 100.26 | 0.61 | tnhrlqwfavfynah   | 13.92 | 1.58 | lnhalwfwagalrhyf  | 13.18 | 2.81 |
| 16 | apqrlqwfaytnslag  | 43.94 | 0.32 | ftgisewfwagplrrfd | 99.78  | 0.61 | apqrlqwfagalrhyf  | 13.38 | 1.51 | lnhyllwfwagalrhyf | 12.97 | 2.76 |
| 17 | tnhykwfwagplrrfd  | 40.14 | 0.29 | cnhyllwfwagplrrfd | 99.62  | 0.61 | tnhyllwfwagparhfd | 12.96 | 1.47 | tnhrlwfwagalrhyf  | 12.91 | 2.75 |
| 18 | apqrlqwfaytnslag  | 38.84 | 0.28 | dhqrlqwfagplrrfd  | 99.59  | 0.61 | qnhylwfwagalrhyf  | 12.73 | 1.44 | tnkwnwfwagalrhyf  | 12.88 | 2.74 |
| 19 | fkdwltwfwagplrrfd | 37.96 | 0.27 | wgkwnwfwagplrrfd  | 99.02  | 0.60 | apqrlqwfagalrhyf  | 12.59 | 1.42 | tnkewifagalrkyf   | 12.86 | 2.74 |
| 20 | tnhykilshytlwfw   | 37.89 | 0.27 | apqrlqwfagalrhyf  | 98.87  | 0.60 | tnhrlwfwagalrhyf  | 11.95 | 1.35 | tnyylwfwagalrhd   | 12.72 | 2.71 |
| 21 | apqrlqwfagplrrfd  | 37.46 | 0.27 | tlqyewfwagalcrwv  | 98.43  | 0.60 | lthylqwfagparhfd  | 11.76 | 1.33 | ecqrlqwfagalrkyf  | 12.43 | 2.65 |
| 22 | apqrlqwfagplrrfd  | 36.83 | 0.27 | ppqrlqwfagplrrfd  | 97.20  | 0.59 | apqrlqwfagalrhyf  | 11.56 | 1.31 | lnhyllwfwagalrhyf | 12.43 | 2.65 |
| 23 | apqrlqwfagplrrfd  | 33.87 | 0.24 | apqrlqwfagalrhyf  | 96.56  | 0.59 | apqrlqwfagalrhyf  | 11.33 | 1.28 | lthylqwfagalrhyf  | 12.30 | 2.62 |
| 24 | apqrlqwfagplrrfd  | 32.81 | 0.24 | apmrlqwfagplrrfd  | 96.50  | 0.59 | lthylqwfagplrrfd  | 10.89 | 1.23 | vgqrlqwfagalrhyf  | 12.27 | 2.61 |
| 25 | plfglqwfagplrrfd  | 31.62 | 0.23 | tnqrltwfwgqlerkd  | 96.12  | 0.59 | anhyllwfwagalrhd  | 10.67 | 1.21 | tnhyllwfwagalrhyf | 12.26 | 2.61 |
| 26 | arhrlqwfagplrrfd  | 31.62 | 0.23 | ligtqlwfwagplrrfd | 94.79  | 0.58 | tnhylqwfagalrhyf  | 10.51 | 1.19 | tnhymwfwagalrhd   | 12.05 | 2.57 |
| 27 | pgtercrplfevrwh   | 30.38 | 0.22 | apqrlqwfagplrrfd  | 94.63  | 0.58 | egkwnwfwagplrrfd  | 10.50 | 1.19 | apqrlqwfagalrhyf  | 12.03 | 2.56 |
| 28 | tnhykilshytlwfw   | 30.11 | 0.22 | tnhylqwfagplrrfd  | 93.85  | 0.57 | epqrlqwfagalrhyf  | 9.28  | 1.05 | tnqrlqwfagalrhd   | 11.96 | 2.55 |
| 29 | apqrlqwfagplrrfd  | 29.97 | 0.22 | tlqrltwfwagplrrfd | 92.62  | 0.56 | tnhyllwfwagalrhyf | 8.82  | 1.00 | anqrlqwfagalrhyf  | 11.63 | 2.48 |
| 30 | drhpnlfghrallwfw  | 29.30 | 0.21 | tnhyllwfwagplrrfd | 91.66  | 0.56 | lgrlctcfwagqlerkd | 8.28  | 0.94 | tnhyllwfwagalrhd  | 11.60 | 2.47 |
| 31 | qprlqwfagplrrfd   | 27.96 | 0.20 | apqrlqwfagalcrwv  | 89.46  | 0.55 | apqrltwfwagparhfd | 7.99  | 0.90 | lnqrlqwfagalrhyf  | 11.57 | 2.47 |
| 32 | pefglewfwagplrrfd | 27.80 | 0.20 | apqrlqwfagalrhd   | 88.78  | 0.54 | ppqrlqwfagalrhyf  | 7.96  | 0.90 | knhtlqwfagalrhyf  | 11.56 | 2.46 |
| 33 | apqrlqwfagplrrfd  | 26.89 | 0.19 | apqrlqwfagalrhd   | 87.31  | 0.53 | dlqrlqwfagalcrwv  | 7.45  | 0.84 | lthylqwfagalrhyf  | 11.55 | 2.46 |
| 34 | fkdnwfwagplrrfd   | 25.98 | 0.19 | apqrlqwfagalrhd   | 85.70  | 0.52 | anhyllwfwagplrrfd | 7.42  | 0.84 | tnqrlqwfagalrhyf  | 11.52 | 2.45 |
| 35 | epqrlqwfagplrrfd  | 25.98 | 0.19 | tnhylqwfagplrrfd  | 85.68  | 0.52 | apqrlqwfagalrhyf  | 7.17  | 0.81 | cthyllwfwagalrhd  | 11.46 | 2.44 |
| 36 | apqrlqwfagplrrfd  | 25.72 | 0.19 | tnhyewfwagplrrfd  | 84.87  | 0.52 | tnhyllwfwagplrrfd | 7.12  | 0.81 | asqrlqwfagalrkyf  | 11.21 |      |

|     |                   |       |      |                   |       |      |                    |      |      |                    |       |      |
|-----|-------------------|-------|------|-------------------|-------|------|--------------------|------|------|--------------------|-------|------|
| 37  | awcptqwfagplrrfm  | 25.67 | 0.18 | apqrlqwfagalrfgp  | 84.44 | 0.52 | tnhryqwfagalcrvw   | 6.94 | 0.79 | asqrlqwfagalrsfy   | 11.18 | 2.38 |
| 38  | apqrlqwfagpsrral  | 25.67 | 0.18 | lqrqlqwfafnlrrfl  | 84.11 | 0.51 | fgglsvwfagplrrfd   | 6.85 | 0.77 | ecqrlqwfagalrqqf   | 11.18 | 2.38 |
| 39  | apqhlqwmaytmrfrk  | 25.45 | 0.18 | apqrlqwfalwfmfdn  | 83.49 | 0.51 | dhqrlqwfagvltrvw   | 6.81 | 0.77 | evdqsqwfaealrmfy   | 11.17 | 2.38 |
| 40  | lrqckkilsylesslag | 25.22 | 0.18 | apqrlqwfalwfmfdn  | 83.44 | 0.51 | dhqrlqwfagvltrvw   | 6.69 | 0.76 | pnqrlqwfagvlrthfy  | 11.11 | 2.37 |
| 41  | drqrlqwfagplrrfd  | 25.17 | 0.18 | aphylqwfagparhfd  | 82.83 | 0.51 | tnhylvqwfaglacrkd  | 6.47 | 0.73 | apqrlqwfagalrthfy  | 11.09 | 2.36 |
| 42  | tnhyekwfagplrmxfd | 25.09 | 0.18 | ldlayikfygalrrfd  | 81.41 | 0.50 | snhykwfagvltrvw    | 6.34 | 0.72 | tnhyllwfagglrkd    | 10.88 | 2.32 |
| 43  | eahrqvwfagplrrfd  | 25.06 | 0.18 | apqrlqwfaytnswfy  | 81.29 | 0.50 | anhylqcfagparhfd   | 6.24 | 0.71 | tnqrlqwfagalrhty   | 10.75 | 2.29 |
| 44  | gtdrhrwfwagplrrfd | 24.83 | 0.18 | slfgeqwfagalcrvw  | 78.26 | 0.48 | tnhylvqwfaghltrvw  | 6.02 | 0.68 | tnkkwnltfagalrthfy | 10.67 | 2.27 |
| 45  | fikdyplpfpallrzw  | 23.78 | 0.17 | higvlqwfagplrrfd  | 78.04 | 0.48 | tnhykwfagalrrfd    | 5.97 | 0.68 | qsqrqefagalrthfy   | 10.62 | 2.26 |
| 46  | apqyvkifsyteslvg  | 23.77 | 0.17 | lqrhrqwfagalcrvw  | 77.21 | 0.47 | apqrswwfagvlrthfd  | 5.96 | 0.67 | asqrlqwfagalrthfy  | 10.59 | 2.25 |
| 47  | apqrlqwfagprahdm  | 23.69 | 0.17 | lpqrlqwfagalcdvw  | 76.79 | 0.47 | apqrsqwfalalrkd    | 5.78 | 0.65 | aserlwfagalcrvw    | 10.55 | 2.25 |
| 48  | drhrplfrplfthrah  | 21.32 | 0.15 | tnhylwifsytmakip  | 76.52 | 0.47 | vtgikewfagplrqfy   | 5.60 | 0.63 | telyhwwfagglrke    | 10.36 | 2.21 |
| 49  | frgisdligtdrhrql  | 21.24 | 0.15 | tnhywkifsmplrthfy | 76.16 | 0.46 | tnhywkifagprrfd    | 5.52 | 0.62 | apqrnqwfalflcrwn   | 10.33 | 2.20 |
| 50  | fiknntlthlfgghrah | 21.20 | 0.15 | epqrltwfwgqlrkd   | 75.98 | 0.46 | apqllpwwfagparrrfl | 5.37 | 0.61 | tnhyslwfwagglrkyd  | 10.32 | 2.20 |
| 51  | lrvcpqwfagplrrfd  | 20.44 | 0.15 | apkrlltwfwgqlrkd  | 74.54 | 0.45 | apqrlqwfagparhfn   | 5.14 | 0.58 | tcqrlqwfagalrthfy  | 10.31 | 2.20 |
| 52  | tpqrlqwcagpywyfe  | 20.35 | 0.15 | qnhyldwfsylesslg  | 73.97 | 0.45 | alvrswwfchlnrkt    | 5.13 | 0.58 | tnhyllwfagglcrvw   | 10.29 | 2.19 |
| 53  | kgtdrhrplfghral   | 20.01 | 0.14 | apqrlqwfagaqrrld  | 73.81 | 0.45 | tnvrswtfwcgyrkt    | 4.95 | 0.56 | cthyllwfagalcrvw   | 10.28 | 2.19 |
| 54  | apqyqlwfhadmtsat  | 19.34 | 0.14 | hkprlewfwagplrqfw | 73.77 | 0.45 | ttgdsewflglrpfgy   | 4.94 | 0.56 | tnhyllwfalpnrrfl   | 10.27 | 2.19 |
| 55  | apqrlqrgyfmaiqp   | 19.16 | 0.14 | wgkknwfyfcpcltds  | 73.72 | 0.45 | apqglwfwaglrthfy   | 4.71 | 0.53 | anhysqwfasalrthfy  | 10.23 | 2.18 |
| 56  | aaqrlqwfghrahdm   | 18.95 | 0.14 | ldkayikwagalcrvw  | 72.14 | 0.44 | apqhqwlymalqlwfh   | 4.65 | 0.53 | tnqrlqwfagalrhtf   | 10.21 | 2.17 |
| 57  | tnhyekiffghrayda  | 18.69 | 0.13 | tnhylvqwfapnlrrfl | 71.79 | 0.44 | tpqrlqmfalfpnhah   | 4.60 | 0.52 | mmhklwfwagllrrfd   | 10.20 | 2.17 |
| 58  | mhmklkifsyteslan  | 18.57 | 0.13 | hkprlewfwalfdhnmh | 71.44 | 0.44 | epqrsqwfklalrkd    | 4.60 | 0.52 | ecqrlqwfagalrthfy  | 10.17 | 2.17 |
| 59  | apqrtqwfagprhpl   | 18.27 | 0.13 | lvlylcwflwdlrrhd  | 69.77 | 0.43 | dhqrlhwfwagalcrvw  | 4.59 | 0.52 | esvrlqwfagalrthfy  | 10.05 | 2.14 |
| 60  | lrglrfmaghkahdm   | 18.21 | 0.13 | plfgltwfwagplrrld | 68.32 | 0.42 | lvvrswwfwcqlrkt    | 4.50 | 0.51 | pprrlqwfagalrthd   | 10.01 | 2.13 |
| 61  | drhrplffagplrrfd  | 17.56 | 0.13 | aphylqwfagparhfd  | 67.92 | 0.41 | lnhylltwfwgqlrkd   | 4.41 | 0.50 | tnhyllwfagplrrfd   | 10.01 | 2.13 |
| 62  | drhrplfghrplrrfd  | 17.23 | 0.12 | hnhylvqwfagparhfd | 67.80 | 0.41 | tnhnlwlymalqlwfw   | 4.40 | 0.50 | tlhyllwfagalrthfy  | 9.96  | 2.12 |
| 63  | aprlqwfagmmtsat   | 16.83 | 0.12 | apqllqwfagplrrfd  | 67.77 | 0.41 | elvrwqfwagplrrfd   | 4.26 | 0.48 | lnhyllwfagparhfd   | 9.92  | 2.11 |
| 64  | frglseiliggplrrfd | 16.48 | 0.12 | lqrqlqwfagparhfd  | 67.07 | 0.41 | tgpyltwfwgqmrhfk   | 4.19 | 0.47 | ecqrlqwfagalrthfy  | 9.89  | 2.11 |
| 65  | apqrlqwfagtsatal  | 16.37 | 0.12 | lpqrnwlymalqlafg  | 64.78 | 0.40 | apqrlqwfagalchfd   | 4.15 | 0.47 | lnrclqwfagalrthfy  | 9.87  | 2.10 |
| 66  | plqrlqwfagplrrfd  | 16.27 | 0.12 | wgkknwfyfcpypda   | 64.56 | 0.39 | tnqrlqwfagalrrfd   | 4.02 | 0.45 | tnsrllwfagalrthfy  | 9.79  | 2.09 |
| 67  | plfghrahdytllrrfd | 16.17 | 0.12 | lgrlqwfagaearkh   | 64.33 | 0.39 | ltgrltwfasawrrqd   | 3.87 | 0.44 | tnvylwfwagglpkfl   | 9.77  | 2.08 |
| 68  | frglnlthimtyhyea  | 16.12 | 0.12 | tnhyetwfwgqlrkd   | 64.29 | 0.39 | epqrlqwfalfterkd   | 3.87 | 0.44 | vthyllwfagplrrfl   | 9.62  | 2.05 |
| 69  | lpqrlqeflglprvec  | 15.92 | 0.11 | apqrlqwfvlfdhlah  | 64.22 | 0.39 | dhqrlqwfagvlprwh   | 3.87 | 0.44 | lttrltifagalrhtf   | 9.60  | 2.04 |
| 70  | vkmmhmvfagdvrrfd  | 15.69 | 0.11 | lgrlqwfagparhfd   | 63.71 | 0.39 | apqrswwfwcqlrkt    | 3.86 | 0.44 | eyqrlqwfagalrthfy  | 9.57  | 2.04 |
| 71  | drhrpwwfagplrrfd  | 15.37 | 0.11 | frglqwfagaealwdd  | 62.99 | 0.38 | kytvlqwfagllrhpw   | 3.72 | 0.42 | tnqreqfwagalrthfy  | 9.54  | 2.03 |
| 72  | gtdrhrplfghrah    | 15.17 | 0.11 | hkprlewfwagplkhd  | 62.92 | 0.38 | tnhyslwfwagparhfd  | 3.64 | 0.41 | kpqrlqwfalflchfy   | 9.48  | 2.02 |
| 73  | gtdqhrptfghrrfd   | 14.73 | 0.11 | apkhnlwlymalqlafg | 62.79 | 0.38 | tnhnlqwfagalcrvw   | 3.62 | 0.41 | qnhyllwfagalrthd   | 9.40  | 2.00 |
| 74  | gtdrhrplfghrah    | 14.73 | 0.11 | apqrlswfaytnslag  | 62.62 | 0.38 | tnhykwfwagqlrkd    | 3.60 | 0.41 | tnhyllwfagglrkd    | 9.40  | 2.00 |
| 75  | lpqrlqwfagplrrfd  | 14.31 | 0.10 | lshknhwfwagplrrfd | 61.96 | 0.38 | apqwtltpfyypmlrmf  | 3.60 | 0.41 | vcrlqwfagalrthfy   | 9.34  | 1.99 |
| 76  | prhrplfghrahdm    | 14.21 | 0.10 | tnqylqwfagparhfd  | 61.48 | 0.37 | tnhyakwfwagplrrfd  | 3.53 | 0.40 | tnhyslwfwagparhfd  | 9.29  | 1.98 |
| 77  | drhrvllfwagahdm   | 14.19 | 0.10 | wgcknfwfagplrrfd  | 61.43 | 0.37 | plvrwswfwcqlrkt    | 3.50 | 0.40 | hgywnwfyfqlcrvw    | 9.24  | 1.97 |
| 78  | apqrlqghrplfhhrah | 14.12 | 0.10 | lnlayikkclwmmfrvw | 60.69 | 0.37 | tnhykwymalqlwfw    | 3.43 | 0.39 | qghyllwfagglrkd    | 9.23  | 1.97 |
| 79  | plfrplfghrahdm    | 13.99 | 0.10 | wgqrlqwfalqdnah   | 60.67 | 0.37 | elvrqwfagparhfd    | 3.43 | 0.39 | tphyllwfagplrrfl   | 9.18  | 1.96 |
| 80  | gtdrhrplfghryhdm  | 13.96 | 0.10 | aplllqwfagdlcrvw  | 60.09 | 0.37 | elvrswfwcqlrkd     | 3.32 | 0.38 | tmhyllwfagglrkd    | 9.12  | 1.94 |
| 81  | tigtdrhrplfghrah  | 13.92 | 0.10 | apqrlqwfalqdnah   | 59.72 | 0.36 | epqrltwfwgqlrkd    | 3.30 | 0.37 | apqrsqwfalflcrvw   | 8.99  | 1.91 |
| 82  | tnhyekifsyteslpl  | 13.83 | 0.10 | epqrltwfwgqlrkd   | 58.28 | 0.36 | apqrlwfwagplrrfd   | 3.30 | 0.37 | atqrlqwfagalcrvw   | 8.96  | 1.91 |
| 83  | apqrlqifsyteslal  | 13.67 | 0.10 | dhqrnwlymalqlafg  | 58.07 | 0.35 | epqrlwfwagplrrfd   | 3.29 | 0.37 | ecqrlqwfagalrthfy  | 8.92  | 1.90 |
| 84  | mhmnlrthimtyhyea  | 13.12 | 0.09 | adlllqwfagahdtds  | 58.01 | 0.35 | mpqrqwfagalrrfd    | 3.28 | 0.37 | asqrlqwfagalrthfy  | 8.70  | 1.85 |
| 85  | gtdrhrplfghrahdm  | 13.02 | 0.09 | apkrllqwfagahdtds | 57.41 | 0.35 | ppqrlqwhagslrrfd   | 3.25 | 0.37 | tnhyslwfwagparhfd  | 8.63  | 1.84 |
| 86  | tnhyekifsyteslal  | 12.81 | 0.09 | nnprlewfwagplrrfy | 57.12 | 0.35 | anhylqwfagplrrfd   | 3.19 | 0.36 | tnhrlqwfagalrthd   | 8.54  | 1.82 |
| 87  | hrplfdlgtdrhrpa   | 12.38 | 0.09 | aplllqwfagplrrfd  | 56.37 | 0.34 | anhylqwfagparhfd   | 3.19 | 0.36 | tnqrlqwfavfyhnan   | 8.49  | 1.81 |
| 88  | apllrnyfisyteslag | 12.09 | 0.09 | plfglqwyagparhfd  | 56.66 | 0.34 | tnhylvqwfagparhfd  | 3.09 | 0.35 | wgkknwfyfqlcrvw    | 8.49  | 1.81 |
| 89  | apqrlqwfagtsatal  | 12.07 | 0.09 | apqrlqwfaytnslag  | 54.86 | 0.33 | ppqrlqwfagalrrfd   | 3.07 | 0.35 | tnqrlwfwagplrrfd   | 8.48  | 1.81 |
| 90  | arhrplfghrahdm    | 12.06 | 0.09 | hkprlewfwagplrqah | 54.59 | 0.33 | tpqhnwlyealqlwfw   | 3.04 | 0.34 | asqrlqwfagalrthd   | 8.45  | 1.80 |
| 91  | lnhyeyefisyteslag | 11.95 | 0.09 | lpkrlqwfagahlrfd  | 54.55 | 0.33 | apmrlqwfagplrrfd   | 3.00 | 0.34 | qnhyllwfagagrsqfy  | 8.43  | 1.80 |
| 92  | mhmnlrplfghrahdm  | 11.89 | 0.09 | lgyllqwfagpdxct   | 53.56 | 0.33 | ahqrltwfwgqlrkd    | 2.99 | 0.34 | thhyllwfagglrkd    | 8.28  | 1.76 |
| 93  | mwmnlrgcfmaimpem  | 11.69 | 0.08 | apqrlqwfagplrrfd  | 52.55 | 0.32 | apmrlqwfagalrrfd   | 2.94 | 0.33 | tahyllwfagghcrvw   | 8.25  | 1.76 |
| 94  | shmlnrgfwagplrrsd | 10.34 | 0.07 | lsprlqwfagplrrfy  | 52.50 | 0.32 | apqrlqwfagparhfd   | 2.88 | 0.33 | tnqrlqwfagvlrthd   | 8.21  | 1.75 |
| 95  | nrhrplfghrahdm    | 10.05 | 0.07 | tnhylvqwyapnlrrfl | 52.24 | 0.32 | epqrltwfwgqlrhd    | 2.85 | 0.32 | sgkknwfyfqlrkd     | 8.16  | 1.74 |
| 96  | apyrplfghrahdm    | 9.92  | 0.07 | apqylqwfagplrrfd  | 52.11 | 0.32 | apqrlqwfagplrrfd   | 2.81 | 0.32 | tlhyllwfagglrkd    | 8.14  | 1.73 |
| 97  | pgtdrhrplfghrah   | 9.68  | 0.07 | trhrplqwfagplrrfd | 52.00 | 0.32 | apqrsqwfagalrrfd   | 2.79 | 0.32 | mpqllqwfagvlcrwn   | 8.11  | 1.73 |
| 98  | drhtplfisyteslag  | 9.64  | 0.07 | apqrlqwfagplrrfk  | 51.16 | 0.31 | tnhewkwfwgqlrpfy   | 2.56 | 0.29 | tnqrlwfwagplrrfy   | 8.04  | 1.71 |
| 99  | tnhrplfghrahdm    | 9.62  | 0.07 | tnqywkifsytmakip  | 51.12 | 0.31 | apqrlqwfagparhfd   | 2.53 | 0.29 | telyewkylflcrvw    | 8.04  | 1.71 |
| 100 | gtdrhrplfghrqp    | 9.56  | 0.07 | apallqwfaytmhngp  | 51.11 | 0.31 | apqrsqwfagalrrfd   | 2.52 | 0.29 | lnhyllwfagkarkfy   | 8.04  | 1.71 |
| 101 | tnhymnlrgcfmaiqp  | 9.53  | 0.07 | drerlqwfalqdnah   | 50.97 | 0.31 | ltgrltwfwagplrrfd  | 2.46 | 0.28 | ecqylwfwagalrrfd   | 7.98  | 1.70 |
| 102 | fikdnlycielnhng   | 9.37  | 0.07 | tnhyllqwfagplrrfd | 50.71 | 0.31 | tnhylvqwfagalrrfd  | 2.45 | 0.28 | tnhyllwfagglrkyd   | 7.81  | 1.66 |
| 103 | tnhmeikfsgplrrfd  | 9.20  | 0.07 | tnhylvqwfagpaslag | 50.22 | 0.31 | ppmrlqwfagplrrfd   | 2.38 | 0.27 | csnyllwfagparhfd   | 7.79  | 1.66 |
| 104 | tnhyelfnhrahdm    | 9.15  | 0.07 | dkprlewfwagplrrfy | 48.83 | 0.30 | ftgisewfwagplrrvw  | 2.33 | 0.26 | ecqrlqwfagalrvfy   | 7.74  | 1.65 |
| 105 | drqtdrhrplfghrah  | 9.05  | 0.07 | apqrlqwfagalcrvw  | 48.48 | 0.30 | ftgislwfwagpaeahfd | 2.32 | 0.26 | wgkknwfyfagllrrfd  | 7.73  | 1.65 |
| 106 | mpvtlqnfkaplrrfd  | 8.96  | 0.06 | wgkknwfyfcpclfyq  | 48.21 | 0.29 | apqrlqwfagglrkd    | 2.29 | 0.26 | tnqrlqwfagalrthd   | 7.66  | 1.63 |
| 107 | drhrplfghrahdm    | 8.64  | 0.06 | tnqrlqwfagalcrvw  | 48.15 | 0.29 | lpqrsqwfagplrrfd   | 2.27 | 0.26 | asqrsnfyfqlcrvw    | 7.60  | 1.62 |
| 108 | drhrplfghrahdm    | 8.56  | 0.06 | hpqrlqwfagplrrfd  | 48.14 | 0.29 | apmrlqwfagplrrfd   | 2.15 | 0.24 | asqrlwfwagglrkd    | 7.58  | 1.61 |
| 109 | fikdlqwmagpnyhfd  | 8.46  | 0.06 | frgisdlfisyteslag | 48.00 | 0.29 | apqrsqwfagalrrfd   | 2.13 | 0.24 | thhyaswfwagparrrfl | 7.56  | 1.61 |
| 110 | tnhyekifisyteslap | 8.33  | 0.06 | liqrlqwfalqdnah   | 45.77 | 0.28 | apqrsqwfagplrrfd   | 2.07 | 0.23 | lttrllqwfagalrthd  | 7.46  | 1.59 |
| 111 | apdrhrplfghrahdm  | 8.24  | 0.06 | frllsqwfagplrrfd  | 45.76 | 0.28 | ftgisewfwagplrrfd  | 2.06 | 0.23 | apqrtqwfagalrthfy  | 7.37  | 1.57 |
| 112 | apqrlqwfagplrrag  | 8.20  | 0.06 | tnhyewifsytmakip  | 45.39 | 0.28 | cnhylltwfwgqlrkd   | 1.97 | 0.22 | ncqrlqwfagalrthfy  | 7.35  | 1.57 |
| 113 | hrplfghrahdmtrfc  | 8.03  | 0.06 | apqrlqwfagplrrfy  | 45.20 | 0.28 | dhtylqwfagparhfd   | 1.91 | 0.22 | snkknwfyfqlrthfy   | 7.33  | 1.56 |
| 114 | tkhyekifisyteqpea | 7.95  | 0.06 | vskknfwfagplrrfd  | 45.03 | 0.27 | cnhylltwfwgqlrkd   | 1.91 | 0.22 | tpkknwfyfagplrrfy  | 7.33  | 1.56 |
| 115 | apqrlqwfagtsatal  | 7.40  | 0.05 | apcrllqwfagalrrfd | 44.02 | 0.27 | tnhylvqwfagancrvd  | 1.83 | 0.21 | tnhycewfwalnrkt    | 7.25  | 1.54 |
| 116 | plfghrahdmtrrrfd  | 7.15  | 0.05 | ephylqwfagparhfd  | 43.24 | 0.26 | wgkknwfyfagplrrfd  | 1.81 | 0.20 | wgkknwfyfqlnrkt    | 7.24  | 1.54 |
| 117 | tnhyekifisyteslag | 7.06  | 0.05 | tnhywicsylesslg   | 43.13 | 0.26 | tqlyewfwagpwtkhd   | 1.77 | 0.20 | tmhkyfwagllrrvw    | 7.16  | 1.52 |
| 118 | tnhhealfsyterpfd  | 7.02  | 0.05 | apqhnwlymalqlafg  | 41.85 | 0.26 | anhylqwfagpwtkhd   | 1.61 | 0.18 | tlhyllqwfagglrkd   | 7.13  | 1.52 |
| 119 | gtdrhrplfghhvm    | 6.93  | 0.05 | dhllrnsfcpallrzw  | 41.84 | 0.26 | apqhnwlyagparhfd   | 1.55 | 0.18 | ekqrlqwfagalrrfd   | 7.09  | 1.51 |
| 120 | apqlfmaigleallga  | 6.77  | 0.05 | liqrlqwfagpccldm  | 41.16 | 0.25 | ppqrlqwfagglrkd    | 1.46 | 0.17 | asqrlqwfagalrthfy  | 7.03  | 1.50 |
| 121 | drhrplfghrahdm    | 6.70  | 0.05 | drhrnqwfagahvlt   | 41.04 | 0.25 | tnkywfwfwgqlrkd    | 1.44 | 0.16 | anhrlqwfagplrrfy   | 6.98  | 1.49 |
| 122 | hrplsdlltdrhrpl   | 6.69  | 0.05 | apqrlqwfaytnslad  | 41.03 | 0.25 | apqrsqwfagplrrfd   | 1.43 | 0.16 | lterltifagalcrvw   | 6.98  | 1.49 |
| 123 | apdrhrplfghrahdm  | 6.49  | 0.05 | lnsyewifsytmakip  | 40.87 | 0.25 | ppqrlqwfagplrrfd   | 1.41 | 0.16 | lttrlltwfwagplrrfd | 6.94  | 1.48 |
| 124 | drhrplfghrahdm    | 6.47  | 0.05 | apqrlqwfaytnslal  | 40.82 | 0.25 | apqrlqwfagplrrfd   | 1.37 | 0.15 | tsqrcewfwagalrvfy  | 6     |      |

|     |                      |          |          |                       |          |          |                       |          |          |                       |          |          |
|-----|----------------------|----------|----------|-----------------------|----------|----------|-----------------------|----------|----------|-----------------------|----------|----------|
| 133 | fikdnlthiadhrpl      | 5,96     | 0,04     | apqrlqwfqgalrrfd      | 36,52    | 0,22     | cnhylvqwcwmmfwdn      | 1,06     | 0,12     | ecqrlnwfkplcrwv       | 6,45     | 1,37     |
| 134 | vnmhmlrgrcfmst       | 5,90     | 0,04     | aplplnsfapallrsv      | 36,44    | 0,22     | apqrlqwfqgalrrfd      | 1,02     | 0,12     | pnhykswfagparckfl     | 6,44     | 1,37     |
| 135 | hrplfghrahdmtyea     | 5,82     | 0,04     | tnhylvqwcwmmfwdn      | 35,51    | 0,22     | apqrlqwfqgalrrfd      | 0,98     | 0,11     | ahqkqwfiycplrqfy      | 6,34     | 1,35     |
| 136 | apqrlqwfqgalrrfd     | 5,75     | 0,04     | ldlayiweagalrrfd      | 35,39    | 0,22     | ppqrlqwcwmmfwdn       | 0,96     | 0,11     | tgqkvnfiylflcrwv      | 6,25     | 1,33     |
| 137 | apqrvpwhrahdmtyea    | 5,75     | 0,04     | epqrlqwfqgalrrfd      | 35,34    | 0,22     | apqrlqwfqgalrrfd      | 0,96     | 0,11     | tnhrlqwfqgalrrfd      | 6,19     | 1,32     |
| 138 | apnrlqwhahpdrvmq     | 5,48     | 0,04     | tnhyqwfagparhfd       | 33,95    | 0,21     | avqrlqnlhdplrrfd      | 0,94     | 0,11     | tnqrlqwfagalerkd      | 6,16     | 1,31     |
| 139 | plfghrahagplrrfd     | 5,42     | 0,04     | lintlqwfagparhfd      | 33,80    | 0,21     | tnhykwewlftnha        | 0,93     | 0,10     | ltrlplfifagalrrfd     | 6,14     | 1,31     |
| 140 | gtdrhrplqghrahfd     | 5,26     | 0,04     | plfgnlfiycpwwlls      | 33,72    | 0,21     | apqrlqwfqgalrrfd      | 0,93     | 0,10     | tnayllwfagglenah      | 6,04     | 1,29     |
| 141 | fikdplfghrahdmtyea   | 5,16     | 0,04     | epqrlqwfqgalrrfd      | 32,84    | 0,20     | epqrlqwfqgalrrfd      | 0,90     | 0,10     | epqrlqwfagparrrfl     | 6,02     | 1,28     |
| 142 | fikdnlthiqtmrrfd     | 5,10     | 0,04     | apqrlqwfagleslag      | 31,98    | 0,20     | apqrlqwfagparhfd      | 0,88     | 0,10     | ecqrlqwfagglrqfy      | 6,01     | 1,28     |
| 143 | ligntdrhrplflpafd    | 5,06     | 0,04     | wgkklqwfagparhfd      | 31,96    | 0,19     | epqrlqwfagparhfd      | 0,88     | 0,10     | vgnkwnffagparrrfl     | 5,91     | 1,26     |
| 144 | apqrlqwfagparhfd     | 5,00     | 0,04     | aplrlnsfppallrsv      | 31,92    | 0,19     | ppqrlqwcwmmfwdn       | 0,88     | 0,10     | asqrlqwfagglcrwv      | 5,87     | 1,25     |
| 145 | gtdyefkifsyteslag    | 4,94     | 0,04     | tnhyldwfdgplrrfd      | 31,84    | 0,19     | apqrlqwfagparhfd      | 0,88     | 0,10     | tvhyllwfavglcrkd      | 5,82     | 1,24     |
| 146 | tnhtdrhrpfcghrah     | 4,77     | 0,03     | tnhyldwfdgplrrfd      | 31,44    | 0,19     | ltgclpcfwgqlcrkd      | 0,84     | 0,10     | alhyqwfsvpardnm       | 5,78     | 1,23     |
| 147 | tnhyekifsydeslag     | 4,77     | 0,03     | apqrlqwfagglcrwv      | 31,04    | 0,19     | apqrlqwfagglcrwv      | 0,82     | 0,09     | asqrlqniylflcrwv      | 5,78     | 1,23     |
| 148 | ppkempwyagpyraf      | 4,76     | 0,03     | frgyewdfsytaiqp       | 30,55    | 0,19     | tnhyqwfagparhfd       | 0,81     | 0,09     | ecqrlqwfagglcrwv      | 5,76     | 1,23     |
| 149 | qlfghrahdmtyea       | 4,40     | 0,03     | tkprlewfatplrqm       | 30,23    | 0,18     | elvrswfwmmqlcrwv      | 0,80     | 0,09     | apqrlqwfagglcrwv      | 5,73     | 1,22     |
| 150 | plfgtrahdmtyea       | 4,28     | 0,03     | epqrlqwfagglcrwv      | 29,95    | 0,18     | apqrlqwfagglcrwv      | 0,79     | 0,09     | ecqrlqwfagglcrwv      | 5,61     | 1,19     |
| 151 | ligntdrhrpplrrfd     | 4,19     | 0,03     | apaisdfisyteslag      | 29,03    | 0,18     | anhykwfwgqlcrkd       | 0,77     | 0,09     | aaqrlqwfagglcrwv      | 5,58     | 1,19     |
| 152 | hrnkghlpphdmtgat     | 4,17     | 0,03     | apqrcqwfagparhfd      | 28,75    | 0,18     | tnhykwfwgqlcrkd       | 0,76     | 0,09     | aelyewifagalcrqfy     | 5,50     | 1,17     |
| 153 | plfdnlthiqtnhyea     | 4,07     | 0,03     | hkprlwfsvqmaiqp       | 28,75    | 0,18     | anpqlqwfagglcrwv      | 0,75     | 0,08     | elqrlqwfagglcrkd      | 5,44     | 1,16     |
| 154 | fikdnlthiqtnhyea     | 4,06     | 0,03     | hkmlrlewfdgplrrfd     | 28,57    | 0,17     | tnhykwfwgqlcrkd       | 0,74     | 0,08     | vnhllwfagglcrwd       | 5,41     | 1,15     |
| 155 | mpqrtwasmampytrfd    | 4,06     | 0,03     | apqrlqwfagglcrwv      | 27,42    | 0,17     | epqrlqwfagglcrwv      | 0,71     | 0,08     | tehyllwfagglcrkd      | 5,28     | 1,12     |
| 156 | apqrlqwfagglcrwv     | 4,06     | 0,03     | lllglqwfagglcrwv      | 27,27    | 0,17     | apqrlqwfagglcrwv      | 0,68     | 0,08     | asqrlqwfagglcrwv      | 5,26     | 1,12     |
| 157 | ayprlqwfagglcrwv     | 4,04     | 0,03     | hkpslqwfagglcrwv      | 27,21    | 0,17     | tnhyllwfwgqlcrkd      | 0,67     | 0,08     | tnkkwnfiycplrqfy      | 5,11     | 1,09     |
| 158 | apycdqafwgplrrfd     | 4,02     | 0,03     | apqrlqwfagglcrwv      | 27,04    | 0,16     | lthywmmfwgqlcrkd      | 0,66     | 0,07     | apqrlqwfagglcrwv      | 5,08     | 1,08     |
| 159 | erkyfhtalqmdsata     | 3,80     | 0,03     | drhrlqwfagglcrwv      | 26,95    | 0,16     | tnhykwfwgqlcrkd       | 0,64     | 0,07     | apqrlqwfagglcrwv      | 4,98     | 1,06     |
| 160 | aplrlnsfppalldm      | 3,69     | 0,03     | aplrlnsfwwgqlcrkd     | 26,58    | 0,16     | nqhykwfwgqlcrkd       | 0,64     | 0,07     | vvgewfnlfnrrql        | 4,97     | 1,06     |
| 161 | gtechvplfqrhthpm     | 3,57     | 0,03     | apqrlqwfagglcrwv      | 26,56    | 0,16     | tnhykwfwgqlcrkd       | 0,64     | 0,07     | tnqrlqwfavdyhna       | 4,91     | 1,04     |
| 162 | plfghrahdmtyea       | 3,53     | 0,03     | ligntdrhrpplrrfd      | 26,04    | 0,16     | epqrlqwfagglcrwv      | 0,59     | 0,07     | anqrlqwfagglcrwv      | 4,83     | 1,03     |
| 163 | frgisdielteslag      | 3,52     | 0,03     | lshkewliycpymf        | 25,79    | 0,16     | apqrlqwfagglcrwv      | 0,58     | 0,07     | ecqrlqwfagglcrwv      | 4,76     | 1,01     |
| 164 | ligntdrhrpplrrfd     | 3,43     | 0,02     | hkprsewfagparhfd      | 25,57    | 0,16     | adhwykwfwgqlcrkd      | 0,57     | 0,06     | ecqsnlwfagalrrfd      | 4,71     | 1,00     |
| 165 | drhrplfghvahdmea     | 3,37     | 0,02     | apnrvqwfagparhfd      | 24,24    | 0,15     | epqrlqwfagglcrwv      | 0,53     | 0,06     | tthrlqwfagglcrwv      | 4,67     | 0,99     |
| 166 | plfghrahdmtyea       | 3,23     | 0,02     | epqrlqwfagglcrwv      | 23,89    | 0,15     | apqrlqwfagglcrwv      | 0,51     | 0,06     | apqrlqwfagglcrwv      | 4,63     | 0,99     |
| 167 | plfghrahdmtyea       | 3,10     | 0,02     | drhrlqwfagglcrwv      | 23,25    | 0,14     | ppqrlqwcwmmfwdn       | 0,51     | 0,06     | apqrlqwfagglcrwv      | 4,62     | 0,98     |
| 168 | gtdlhrplfgeallga     | 3,06     | 0,02     | epqrlqwfagglcrwv      | 23,20    | 0,14     | tnhyllwfwgqlcrkd      | 0,47     | 0,05     | ecqrlqwfagglcrwv      | 4,55     | 0,97     |
| 169 | dyhrplfghdmtyea      | 2,97     | 0,02     | qanrltafagparhfd      | 22,75    | 0,14     | tnhykwfwgqlcrkd       | 0,46     | 0,05     | tnqrlqwfagglcrwv      | 4,54     | 0,97     |
| 170 | plfghrahdmtyea       | 2,85     | 0,02     | cpqamtkfahalrrwd      | 22,09    | 0,13     | ppqrlqwcwmmfwdn       | 0,45     | 0,05     | ppqrlqwfagglcrwv      | 4,53     | 0,96     |
| 171 | fhgisghrahdmtyea     | 2,81     | 0,02     | hskhnwlysaplrrfd      | 21,67    | 0,13     | tnqyatwfwgqlcrkd      | 0,44     | 0,05     | tnqrlqwfagglcrwv      | 4,52     | 0,96     |
| 172 | tagtnlqrpfcavah      | 2,75     | 0,02     | ppqrlqwfagglcrwv      | 21,51    | 0,13     | apqrlqwfagglcrwv      | 0,44     | 0,05     | apqrlqwfagglcrwv      | 4,52     | 0,96     |
| 173 | vnmhmnrgpplrrfd      | 2,67     | 0,02     | epqrlqwfagglcrwv      | 21,22    | 0,13     | epqrlqwfagglcrwv      | 0,42     | 0,05     | alqyillwfadglcrkd     | 4,50     | 0,96     |
| 174 | hrplfghrahdmtyea     | 2,60     | 0,02     | frprlewmagplrrfd      | 19,97    | 0,12     | tnhykwfwgqlcrkd       | 0,42     | 0,05     | tnqrlqwfagglcrwv      | 4,42     | 0,94     |
| 175 | plfghrahdmtyea       | 2,52     | 0,02     | drhrylkwfwgqlcrwv     | 19,94    | 0,12     | apqrlqwfagglcrwv      | 0,40     | 0,04     | tmhklwfagglcrwv       | 4,37     | 0,93     |
| 176 | prgysldigtqsrsh      | 2,51     | 0,02     | drhrlqwfagglcrwv      | 19,82    | 0,12     | tnhykwfwgqlcrkd       | 0,39     | 0,04     | tnhyllwfwgqlcrkd      | 4,33     | 0,92     |
| 177 | fikdnlthiqtnhyea     | 2,49     | 0,02     | epqrlqwfagglcrwv      | 19,06    | 0,12     | epqrlqwfagglcrwv      | 0,39     | 0,04     | apqrlqwfagglcrwv      | 4,23     | 0,90     |
| 178 | pafghhahrahdmtyea    | 2,40     | 0,02     | apqrlqwfagglcrwv      | 18,65    | 0,11     | atqplqwfagparhfd      | 0,36     | 0,04     | tnqrlqwfagglcrwv      | 4,13     | 0,88     |
| 179 | klfehrahdmtyea       | 2,32     | 0,02     | tnhyllwfwgqlcrkd      | 18,26    | 0,11     | apqrlqwfagglcrwv      | 0,36     | 0,04     | tnqrlqwfagglcrwv      | 4,12     | 0,88     |
| 180 | gtdrhrpplrrfd        | 2,24     | 0,02     | apqrlqwfagglcrwv      | 17,78    | 0,11     | tnqrlqwfagglcrwv      | 0,36     | 0,04     | lqrlqwfagglcrwv       | 3,99     | 0,85     |
| 181 | ligntdrhrpplrrfd     | 2,20     | 0,02     | epqrlqwfagglcrwv      | 16,37    | 0,10     | tmgrltwfwgqlcrkd      | 0,36     | 0,04     | tnhrlqwfagglcrwv      | 3,96     | 0,84     |
| 182 | gtdclrgcfmaiqpea     | 2,16     | 0,02     | aellrnsfapalrrfd      | 16,31    | 0,10     | tnhyllwfwgqlcrkd      | 0,35     | 0,04     | ecqrlqwfagglcrwv      | 3,87     | 0,82     |
| 183 | qimdnltisiktthyma    | 2,08     | 0,01     | apqrlqwfagglcrwv      | 14,65    | 0,09     | elvrswfwmmqlcrwv      | 0,34     | 0,04     | tqrlqwfagglcrwv       | 3,76     | 0,80     |
| 184 | lpgtdrhrpplrrfd      | 2,04     | 0,01     | hkpelewfdgplrrfd      | 14,28    | 0,09     | wgkklqwfagglcrwv      | 0,31     | 0,04     | apqrlqwfagglcrwv      | 3,75     | 0,80     |
| 185 | vnmhmlrgrcfmst       | 1,82     | 0,01     | lpgtlqgflnprrrfd      | 14,18    | 0,09     | tnqrlqwfagglcrwv      | 0,31     | 0,03     | asqrlqwfagglcrwv      | 3,61     | 0,77     |
| 186 | frgisdielteslag      | 1,75     | 0,01     | lrgrlqwfagglcrwv      | 14,15    | 0,09     | apeyqwfagglcrwv       | 0,30     | 0,03     | asqrlqwfagglcrwv      | 3,53     | 0,75     |
| 187 | fikdnlthiqtnhyea     | 1,66     | 0,01     | arhrlqwfagglcrwv      | 13,35    | 0,08     | apqrlqwfagglcrwv      | 0,30     | 0,03     | tyqrlqwfagglcrwv      | 3,34     | 0,71     |
| 188 | vnmhmlrgrcfmst       | 1,47     | 0,01     | epqrlqwfagglcrwv      | 12,23    | 0,07     | tqrlqwfagglcrwv       | 0,29     | 0,03     | apqrlqwfagglcrwv      | 3,29     | 0,70     |
| 189 | plfghrahdmtyea       | 1,40     | 0,01     | aplrlnsfppalrrfd      | 12,07    | 0,07     | apqrlqwfagglcrwv      | 0,28     | 0,03     | apqrlqwfagglcrwv      | 3,06     | 0,65     |
| 190 | apqrlqwfagglcrwv     | 1,39     | 0,01     | apqrlqwfagglcrwv      | 11,38    | 0,07     | apqrlqwfagglcrwv      | 0,26     | 0,03     | qnllwfwagglcrwv       | 2,82     | 0,60     |
| 191 | lhgtdrhrpplrrfd      | 1,33     | 0,01     | nkllknpfapalrrfd      | 11,34    | 0,07     | tnhykwfwgqlcrkd       | 0,25     | 0,03     | tnhsvlwfagglcrwv      | 2,76     | 0,59     |
| 192 | arqcfmaiqpea         | 1,32     | 0,01     | agkknwlyscpymf        | 10,38    | 0,06     | ppqrlqwcwmmfwdn       | 0,25     | 0,03     | ewqrlqwfagglcrwv      | 2,55     | 0,54     |
| 193 | apqrlqwfagglcrwv     | 1,30     | 0,01     | apqrlqwfagglcrwv      | 7,71     | 0,05     | lpgwqwfagglcrwv       | 0,25     | 0,03     | teqrlqwfagglcrwv      | 2,49     | 0,53     |
| 194 | aplrlnsfppalrrfd     | 1,28     | 0,01     | apqrlqwfagglcrwv      | 5,69     | 0,03     | epqrlqwfagglcrwv      | 0,22     | 0,02     | pphyllwfwagglcrwv     | 2,46     | 0,52     |
| 195 | gigtldrhrpplrrfd     | 1,24     | 0,01     | adsrlqwfagglcrwv      | 5,41     | 0,03     | wdrvrtwfwgqlcrkd      | 0,18     | 0,02     | tmhklwfagglcrwv       | 0,94     | 0,20     |
| 196 | fikdnlthiqtnhyea     | 1,08     | 0,01     | apqrlqwfagglcrwv      | 4,24     | 0,03     | apeewmfagglcrwv       | 0,17     | 0,02     | tnhyllwfwagglcrwv     | 0,74     | 0,16     |
| 197 | plfghrahdmtyea       | 0,98     | 0,01     | dhqrlqwfagglcrwv      | 3,50     | 0,02     | lvtktwfwgglcrwv       | 0,14     | 0,02     | tnhyllwfwagglcrwv     | 0,46     | 0,10     |
| 198 | gldrhrpplrrfd        | 0,95     | 0,01     | tnhyllwfwagglcrwv     | 2,78     | 0,02     | ppqrlqwcwmmfwdn       | 0,13     | 0,01     | snrdevfagglcrwv       | 0,45     | 0,10     |
| 199 | ligntdrhrpplrrfd     | 0,74     | 0,01     | apqrlqwfagglcrwv      | 1,51     | 0,01     | tnqrlqwfagglcrwv      | 0,12     | 0,01     | tnqrlqwfagglcrwv      | 0,36     | 0,08     |
| 200 | apqrlqwfagglcrwv     | 0,62     | 0,00     | drhrlqwfagglcrwv      | -0,17    | 0,00     | ftgidewfagglcrwv      | 0,10     | 0,01     | teyefifagglcrwv       | 0,33     | 0,07     |
|     | <b>Lead Pehdides</b> | <b>x</b> | <b>c</b> | <b>Lead from Gen1</b> | <b>x</b> | <b>c</b> | <b>Lead from Gen2</b> | <b>x</b> | <b>c</b> | <b>Lead from Gen3</b> | <b>x</b> | <b>c</b> |
|     | apqrlqwfagglrrfd     | 26,89    | 0,19     |                       |          |          | tnhykwfwgqlcrkd       | 0,73     | 0,08     | tnhyllwfwagglcrwv     | 11,00    | 2,34     |
|     | tnhyekifsyteslag     | 7,06     | 0,05     |                       |          |          | apqrlqwfagglrrfd      | 2,81     | 0,32     | tnqrlqwfagglrrfd      | 9,72     | 2,07     |
|     | drhrplfghrahdmtyea   | 8,56     | 0,06     |                       |          |          | apqrlqwfagglrrfd      | 1,07     | 0,12     | ecqrlqwfagglrrfd      | 9,22     | 1,96     |
|     | plfghrahdmtyea       | 2,85     | 0,02     |                       |          |          | epqrlqwfagglrrfd      | 4,08     | 0,46     | asqrlqwfagglrrfd      | 10,45    | 2,23     |
|     | mhmlrgrcfmaiqpea     | 4,37     | 0,03     |                       |          |          | ltgrltwfwgqlcrkd      | 3,33     | 0,38     | vgkknwfiylflcrwv      | 10,15    | 2,16     |
|     | vnmhmlrgrcfmaiqp     | 6,22     | 0,04     | tnhyllwfwagglrrfd     | 107,48   | 0,66     | tnhyllwfwagglrrfd     | 13,49    | 1,53     | tnkkwnfiycplrqfy      | 7,08     | 1,51     |
|     | aplrlnsfppallrsv     | 27,09    | 0,20     | epqrlqwfagglrrfd      | 78,41    | 0,48     | tnhyllwfwagglrrfd     | 3,27     | 0,37     | lnhyllwfwagglrrfd     | 13,33    | 2,84     |
|     | hrplfghrahdmtyea     | 6,29     | 0,05     | apqrlqwfagglrrfd      | 113,79   | 0,69     | anhyllwfwagglrrfd     | 1,92     | 0,22     | tnhyllwfwagglrrfd     | 10,78    | 2,30     |
|     | gtdrhrplfghrahdm     | 9,14     | 0,07     | apqrlqwfagglrrfd      | 72,93    | 0,44     | tnhyllwfwagglrrfd     | 10,19    | 1,15     | teyefifagglrrfd       | 8,89     | 1,89     |
|     | ligntdrhrplfghrah    | 14,97    | 0,11     | hkprlewfdgplrrfd      | 68,31    | 0,42     | elvrswfwmmqlcrwv      | 2,86     | 0,32     | tmhklwfagglrrfd       | 9,61     | 2,05     |
|     | frgisdieltdrhrpl     | 12,83    | 0,09     | ligntdrhrplrrfd       | 79,12    | 0,48     | epqrlqwfagglrrfd      | 7,12     | 0,81     | ppqrlqwfagglrrfd      | 8,97     | 1,91     |
|     | fikdnlthiqtnhyea     | 4,06     | 0,03     | drhrlqwfagglrrfd      | 56,34    | 0,34     | tnhyllwfwagglrrfd     | 5,67     | 0,64     | apqrlqwfagglrrfd      | 6,88     | 1,47     |
|     |                      |          |          | tnhyewifsytaiqp       | 51,16    | 0,31     | apqrlqwfagglrrfd      | 6,63     | 0,75     | cthyllwfwagglrrfd     | 11,36    | 2,42     |
|     |                      |          |          | aplrlqwfagglrrfd      | 54,72    | 0,33     | ppqrlqwfagglrrfd      | 25,18    | 2,85     | ltrlqwfagglrrfd       | 6,60     | 1,41     |
|     |                      |          |          | apqrlqwfagglrrfd      | 46,35    | 0,28     | apqrlqwfagglrrfd      | 3,44     | 0,39     | tnhrlqwfagglrrfd      | 8,08     | 1,72     |
|     |                      |          |          | dhqrlqwfagglrrfd      | 43,40    | 0,26     | ftgisewfagglrrfd      | 5,57     | 0,63     | apqrlqwfagglrrfd      | 7,48     | 1,59     |
|     |                      |          |          | apqrlqwfagglrrfd      | 43,52    | 0,27     | cnhyllwfwagglrrfd     | 0,95     | 0,11     | tnhyllwfwagglrrfd     | 8,11     | 1,73     |
|     |                      |          |          | lrgqlqwfagglrrfd      | 57,64    | 0,35     | dhqrlqwfagglrrfd      | 6,55     | 0,74     | qnhyllwfwagglrrfd     | 13,34    | 2,84     |
|     |                      |          |          | plfghrahdmtyea        | 52,76    | 0,32     | wgkknwfiycplrqfy      | 16,86    | 1,91     | apqrlqwfagglrrfd      | 6,82     | 1,45     |
|     |                      |          |          | frgisdielteslag       | 38,49    | 0,23     | apqrlqwfagglrrfd      | 12,26    | 1,39     | tnhrlwfwagglrrfd      | 8,33     | 1,77     |
|     |                      |          |          | apqrlqwfagglrrfd      | 48,87    | 0,30     | tqlyewifagglrrfd      | 10,11    |          |                       |          |          |

|    | Generation 5       | x     | c    | Generation 6      | x     | c    | Generation 7       | x      | c     | Generation 8      | x     | c     |
|----|--------------------|-------|------|-------------------|-------|------|--------------------|--------|-------|-------------------|-------|-------|
| 1  | tnkewnwafagalrhyf  | 35,06 | 6,03 | pnkevhwvdgalrmwl  | 65,96 | 9,05 | nwkwnnwagalrmfl    | 128,99 | 15,05 | nwknewwagalrmwl   | 73,49 | 20,01 |
| 2  | vaskwqwwagalrkfl   | 33,28 | 5,72 | tsqevqswagalrmwl  | 55,24 | 7,58 | tnkdwnnwagalrkfl   | 99,14  | 11,57 | nwkwnnwagaalrqfl  | 67,37 | 18,34 |
| 3  | tnkkewifygalrqfs   | 31,54 | 5,42 | tnkewnwfgalrmfl   | 53,52 | 7,34 | tgkewqswagalrmwl   | 90,20  | 10,53 | nwkwnnwagaalkkfl  | 64,93 | 17,68 |
| 4  | vgskewifygtrlrgfy  | 29,21 | 5,02 | tnkelnwagalrkfl   | 52,40 | 7,19 | qnkevhwvdgalrmwl   | 76,97  | 8,98  | dwnkwnwaaalrmfn   | 64,06 | 17,44 |
| 5  | wqwwltwafagalrhy   | 29,07 | 5,00 | wkwmltwafagalrkfh | 47,00 | 6,45 | ymkwqwwagalrmfl    | 69,13  | 8,07  | nwkwnnwvagalrhl   | 55,08 | 15,00 |
| 6  | ttqwdwafagalrhl    | 28,87 | 4,96 | ttqwdwaaagalrhw   | 43,61 | 5,98 | pnkevhwvdgalrmwl   | 68,58  | 8,00  | nwkwnnwagalrmfl   | 51,97 | 14,15 |
| 7  | mqwwhwifagalrhd    | 27,34 | 4,70 | asqqlqwagalrqfy   | 43,32 | 5,94 | wqwwlnwfgalrmfl    | 68,23  | 7,96  | nwkwnnwvdgalrmwl  | 50,03 | 13,62 |
| 8  | tnkwnnwagalrcfy    | 27,08 | 4,66 | vakkwqwwagallshfy | 43,10 | 5,91 | tnqrlqwvgyllrqfl   | 66,86  | 7,80  | nwknlwvagalrsktl  | 48,08 | 13,09 |
| 9  | tnnrlqwwagalrkfl   | 26,71 | 4,59 | vmskwqwwagalrkfl  | 42,86 | 5,88 | vaskwnwagqlrkwl    | 66,80  | 7,79  | nwknywwaagalrmfl  | 47,99 | 13,07 |
| 10 | tnkkewifygalrqfy   | 26,38 | 4,54 | takvwnnwagalrkfl  | 42,32 | 5,81 | tgkewnwfgalrhw     | 66,09  | 7,71  | wkktwwwllalrhl    | 47,72 | 12,99 |
| 11 | lsqrlqwagalrkfl    | 25,62 | 4,41 | wqwwlmwafagalrhd  | 42,29 | 5,80 | wkwllhwfdgalrkfl   | 64,29  | 7,50  | wsswnnwagqlrkwl   | 46,08 | 12,55 |
| 12 | asmevqwwagalrmwl   | 25,43 | 4,37 | wqwwlwwfagalrkml  | 41,99 | 5,76 | pnkevhwvdgalrmwl   | 63,77  | 7,44  | tnkdwnwagaalrkfl  | 44,32 | 12,07 |
| 13 | asqdlqwagalrhyf    | 24,67 | 4,24 | thpevqwwagalrmwl  | 40,54 | 5,56 | tsqevqswagalrmwl   | 62,93  | 7,34  | qykwqwwagallhfl   | 41,90 | 11,41 |
| 14 | tnhyllwafagalrkfl  | 24,41 | 4,20 | vaskwqwwagalrkfl  | 39,61 | 5,43 | qakkwqwwagllshfl   | 62,39  | 7,28  | nwkwnwvgyllrqfy   | 41,37 | 11,27 |
| 15 | tnknwnwagalrhyf    | 24,28 | 4,18 | nwkwnnwvagalakfc  | 39,16 | 5,37 | pnkkwqwwagwllshwy  | 61,00  | 7,12  | pnkhwqwwagwllrwm  | 41,25 | 11,23 |
| 16 | tsqrlqwagalrkfl    | 23,31 | 4,01 | tnkewnwafagalrhyf | 38,94 | 5,34 | tnqetqswagalrmwl   | 60,36  | 7,04  | tmsnwnwakaalrmfl  | 41,09 | 11,19 |
| 17 | asprlqwafagalrhyf  | 23,10 | 3,97 | tnkkewifygalrqfs  | 38,70 | 5,31 | takvwnnwafagalrhl  | 59,66  | 6,96  | wqwwlnwagaalrmf   | 40,58 | 11,05 |
| 18 | tnnrlqwwagalrkfl   | 23,08 | 3,97 | tnwnlwafagalrhyf  | 36,44 | 5,00 | nwkwnnwvdtalrkwl   | 58,29  | 6,80  | dwnwnnwagalrml    | 38,87 | 10,58 |
| 19 | tnwylwvafagalrkfl  | 22,98 | 3,95 | asmevqwwagalrmfl  | 35,75 | 4,90 | tnkagwqwwagalrhl   | 57,02  | 6,65  | tnkdwnwvgyllshfy  | 38,69 | 10,54 |
| 20 | tnyknwafagalrhyf   | 22,95 | 3,95 | tnqrlqwvgyllrqfl  | 35,51 | 4,87 | wqwwlmwafagalrhl   | 55,63  | 6,49  | pwknwnwagalamsl   | 38,47 | 10,48 |
| 21 | tnnalswafagalrhyf  | 22,95 | 3,95 | vgskewifygtrlrgfy | 35,04 | 4,81 | wqwwlwwfvgayrkmd   | 55,57  | 6,49  | tvqkqwwagllssfl   | 38,44 | 10,47 |
| 22 | wnkqpnwafagalwhfh  | 22,90 | 3,94 | wqywtwafagalrhl   | 34,75 | 4,77 | vmskwqwwagalrmfl   | 55,11  | 6,43  | qakkmwvagalrshwl  | 37,49 | 10,21 |
| 23 | tnhyslwfagalrhm    | 22,89 | 3,94 | tnkkewifygalrqms  | 34,65 | 4,75 | hgywqtwafadalrqfy  | 53,68  | 6,26  | wqwwlnwfgalrhmfl  | 37,37 | 10,17 |
| 24 | tnkkewifygalrkss   | 22,64 | 3,89 | nsnrlqwwagalwhfh  | 34,60 | 4,75 | tnkewnwafagalrhmfl | 53,57  | 6,25  | nwenwnwvqalrhl    | 36,58 | 9,96  |
| 25 | tnhyllwafagalrhyf  | 22,39 | 3,85 | wnkewifygalrqfs   | 34,41 | 4,72 | wqwwlhwaaalrmwl    | 53,28  | 6,22  | wqwwlwwfvalrkphl  | 36,27 | 9,87  |
| 26 | tnkqwnwafagalrhyf  | 22,01 | 3,79 | agskewifygalwhfh  | 34,37 | 4,71 | wqwwlwwfvaalrkfh   | 52,29  | 6,10  | wkwdhwfagwllshwy  | 36,12 | 9,83  |
| 27 | lthalswafagalrhyf  | 21,83 | 3,75 | tnkewnwafagalrhyf | 34,34 | 4,71 | wkwlltwfasalrshfl  | 51,42  | 6,00  | tnkdwnwagaalrhm   | 35,85 | 9,76  |
| 28 | tnknwifagalrqfy    | 21,81 | 3,75 | tskkewifygalrqfs  | 34,04 | 4,67 | akwlltwfagalrmwl   | 51,34  | 5,99  | tnhawqwwagaldhfl  | 35,42 | 9,64  |
| 29 | tnhyllwafagqlrhyf  | 20,93 | 3,60 | lsmkwwvagalrkfl   | 33,24 | 4,56 | wqwwlwfagalrkfs    | 50,83  | 5,93  | nwnwnwvagalrhmfl  | 35,37 | 9,63  |
| 30 | tnhyllwifagalrhhf  | 20,92 | 3,60 | tnktewwaaagalrkfl | 33,09 | 4,54 | wqewlhwfdgalrhl    | 50,66  | 5,91  | wqwwlmwafagalrhd  | 34,82 | 9,48  |
| 31 | lnkkewifygalrqfy   | 20,69 | 3,56 | wnkqenwfahwlrhyf  | 32,69 | 4,48 | wqwwlqwwagalrqsy   | 50,59  | 5,90  | nkwkwnwagalrhmfl  | 34,37 | 9,36  |
| 32 | tnhyllwafagalrhyf  | 20,62 | 3,55 | tnkewnwafagalrhy  | 32,65 | 4,48 | vashwqwwagalrmwl   | 50,23  | 5,86  | wqwwlhwfagalrhmfl | 34,01 | 9,26  |
| 33 | vgskwvayagalrhyf   | 20,20 | 3,47 | vgsvwnwvagalrcfy  | 32,62 | 4,48 | wqkvwmmwagawrkfv   | 49,55  | 5,78  | tgswqwwagalaml    | 33,50 | 9,12  |
| 34 | tgswnwifagalrhyf   | 20,15 | 3,47 | tnsrpwwagalrkfl   | 32,17 | 4,41 | lhpevqwwagalrmwl   | 49,23  | 5,74  | tnkdwdwagalrwl    | 33,40 | 9,09  |
| 35 | tnqylpafagalrkfl   | 20,12 | 3,46 | tnkkewifygalrqfy  | 31,87 | 4,37 | pkwlltwfagalrmwl   | 48,64  | 5,68  | tgkewwvagalrhmfl  | 33,26 | 9,06  |
| 36 | tnkylwvafagalrhhf  | 19,98 | 3,44 | wqgkewifygtrlrgfy | 31,62 | 4,34 | wqwwldwagalrkfl    | 48,38  | 5,65  | tnwllhwkealrmwl   | 33,06 | 9,00  |
| 37 | qnhyllwafagalrhyf  | 19,93 | 3,43 | tnpkwwvafagalrhyf | 31,62 | 4,34 | tgkwvqswagalrmwl   | 47,60  | 5,55  | tnwllwvagaalrkfl  | 32,91 | 8,96  |
| 38 | asqrlqwagalwhfh    | 19,81 | 3,41 | mqghwifagalrhyf   | 31,51 | 4,32 | qkqelnwagaalrkfl   | 46,69  | 5,45  | nwenwqywwagalaml  | 32,08 | 8,74  |
| 39 | tnkslwfagalrhyf    | 19,80 | 3,41 | wnwylwvafagalrhyf | 31,41 | 4,31 | wqwwlwwfvaalrkml   | 46,36  | 5,41  | wqwwlwwfvglqgkmd  | 31,78 | 8,65  |
| 40 | aqwwlqfagalrhyf    | 19,69 | 3,39 | vnkhwdwafagalrhyf | 31,09 | 4,26 | tnkelnwagaalrkfl   | 45,33  | 5,29  | nwkwnwvgyllrqfy   | 31,62 | 8,61  |
| 41 | dnhrllqfagalwhfh   | 19,52 | 3,36 | ssprlqwagalwhfh   | 30,50 | 4,18 | takvwnnwagalrcfl   | 44,28  | 5,17  | wvwnlnwfgalrphf   | 31,52 | 8,58  |
| 42 | tnhyllwafagllrhyf  | 19,28 | 3,32 | tnkswnwvagalrhyf  | 30,48 | 4,18 | vmskwqlwvagalakfc  | 44,21  | 5,00  | pnkkwqwwaallrhl   | 31,43 | 8,56  |
| 43 | tnkkewifygalrqfy   | 19,21 | 3,30 | wnkkewifygalakds  | 30,44 | 4,18 | wqkwqywwagalrkfl   | 42,80  | 4,99  | kmskwqwwagalrkfw  | 31,28 | 8,52  |
| 44 | ynwylwvafagalrhyf  | 19,00 | 3,27 | mqgwhwifawalrhyf  | 30,03 | 4,12 | tnwnlnwfgalrhl     | 42,79  | 4,99  | pnkdwnwaaalrksl   | 31,22 | 8,50  |
| 45 | qnhyllwafagalrhyf  | 18,96 | 3,26 | lnkewvafagalrhy   | 29,84 | 4,09 | ttqwwlwfagalrhl    | 42,78  | 4,99  | tgqkwwagagalrml   | 30,52 | 8,31  |
| 46 | lnhalswafagalwhfh  | 18,92 | 3,25 | tnwllwnwagalrhyf  | 29,57 | 4,06 | wqwwlmwafagaqkml   | 42,58  | 4,97  | wkwllhwfagalrhm   | 30,50 | 8,30  |
| 47 | anhyllwafagalrhd   | 18,85 | 3,24 | tnyknwvafawalrhyf | 29,29 | 4,02 | tnkewnwafagalrhyf  | 42,39  | 4,95  | tnkdwnwvqalrhl    | 30,42 | 8,28  |
| 48 | aqwylwvafagalrhyf  | 18,55 | 3,19 | wqwwltwafagalrhyf | 29,03 | 3,98 | onkeaqwwagallshfy  | 42,38  | 4,95  | ywknwnwamaalrml   | 30,40 | 8,28  |
| 49 | tnqtlqfagalrhyf    | 18,50 | 3,18 | tnhyllwifagalrhyf | 28,70 | 3,94 | wkwlltwfagalrhl    | 41,65  | 4,86  | nknlnwvfgalrhl    | 30,33 | 8,26  |
| 50 | tnhywqwwagalrkps   | 18,48 | 3,18 | cgwwhwifagalrhl   | 28,59 | 3,92 | wqywtwafagalrhyf   | 41,14  | 4,80  | wqwwlwwfvgayrml   | 30,29 | 8,25  |
| 51 | lnqaldwafagalrhyf  | 18,45 | 3,17 | nakwvafagalrhyf   | 28,29 | 3,88 | vmskwqwwagalsqfk   | 40,68  | 4,75  | tgkewqwwagalrml   | 29,79 | 8,11  |
| 52 | tnwylwvafagalrhyf  | 18,38 | 3,16 | wqwwltwafagalrhyf | 28,13 | 3,86 | pnkewnwafagalrha   | 40,22  | 4,69  | qmkwnwvagalrhmfl  | 29,69 | 8,08  |
| 53 | alqzwnwafagalrhyf  | 18,34 | 3,15 | wkwqplwafagalrhyf | 28,03 | 3,85 | wkwlltwfagalrhmfl  | 40,00  | 4,67  | nqwwlwwfvgayrkm   | 29,69 | 8,08  |
| 54 | asqrlqwagalrkfl    | 18,00 | 3,10 | askennwafadalrhyf | 28,00 | 3,84 | asqqlqwagalshny    | 39,67  | 4,63  | wqwwlhwasaalrml   | 29,40 | 8,00  |
| 55 | vwqrlqwagalrhl     | 17,47 | 3,00 | vgsdlqwagalrhm    | 27,79 | 3,81 | wqdlwvafakllrvm    | 39,25  | 4,58  | tnkdwnwvagalrml   | 29,14 | 7,93  |
| 56 | tnkkewvafaycrfh    | 17,42 | 3,00 | tnkewvafagalrhyf  | 27,76 | 3,81 | wkvwvawdgalrkfl    | 38,76  | 4,52  | vshkwvawagalrskfl | 29,12 | 7,93  |
| 57 | lthylqfagalrhyf    | 17,29 | 2,97 | lsqrlqwagalakel   | 27,55 | 3,78 | tswhwvafagalrkhf   | 38,62  | 4,51  | nwkqwnwagaalrhl   | 28,95 | 7,88  |
| 58 | tnkqwnwafagalrhyf  | 17,25 | 2,97 | tnyknwvafaklmhfy  | 27,47 | 3,77 | pnkevmmwfdgalrhl   | 38,17  | 4,45  | pwknwvawagllrhl   | 28,94 | 7,88  |
| 59 | qnhyllwafagalrhyf  | 17,17 | 2,95 | dqwnwvafagalrhyf  | 27,39 | 3,76 | ttqwlwvagalrhw     | 37,70  | 4,40  | wqwwcmwafagalrml  | 28,82 | 7,85  |
| 60 | asqrlqwagalrkfl    | 17,10 | 2,94 | ttqwdwvagalrhm    | 27,37 | 3,75 | qgskewifygtrlrgfh  | 37,56  | 4,38  | mknkwnwvagalrhl   | 28,56 | 7,78  |
| 61 | tnwylwvafagalrhyf  | 17,08 | 2,94 | ttqylwvafagalrhd  | 27,13 | 3,72 | nksvlnwvagalrkfl   | 37,12  | 4,33  | qnkewhwagwllshwy  | 28,55 | 7,77  |
| 62 | tnkkldwafagalrhyf  | 16,87 | 2,90 | tnnavswagclrmwl   | 26,67 | 3,66 | tnqymqwwagalrhyf   | 37,11  | 4,33  | nkwkwnwfgalrhl    | 28,53 | 7,77  |
| 63 | thkkewifagalrhyf   | 16,87 | 2,90 | lsqrlqwagalrhd    | 26,66 | 3,66 | tnwllwvafagalrhl   | 36,52  | 4,26  | nwdnwnwvagalrml   | 28,31 | 7,71  |
| 64 | tnskewvafagalrhyf  | 16,67 | 2,87 | tnkkewifygalrhyf  | 26,66 | 3,66 | vmskwqwwhkalrml    | 35,50  | 4,14  | tgkewasagalrwm    | 28,21 | 7,68  |
| 65 | qnhyllwafagalrhyf  | 16,62 | 2,86 | tnlalswagallrhm   | 25,92 | 3,56 | asqhlwvagalakfc    | 35,49  | 4,14  | wqwwlhwvagalrhl   | 28,07 | 7,64  |
| 66 | lnhyllwafagalrhyf  | 16,62 | 2,86 | ttqqlwafagalrkfl  | 25,72 | 3,53 | tnsqevqswagllshfy  | 35,27  | 4,12  | nkdwnwagaalrhl    | 27,67 | 7,53  |
| 67 | tnhyllwafagalrhyf  | 16,61 | 2,86 | asprlqwvagalrkfl  | 25,68 | 3,52 | ekwlltwfagalrhm    | 35,11  | 4,10  | wqwwlhwagaalrml   | 27,64 | 7,53  |
| 68 | lnhalswafagalrhyf  | 16,59 | 2,85 | tnqllwvagalrkfh   | 25,65 | 3,52 | ttqwwlwfagalrhl    | 34,60  | 4,04  | lwnkwnwvagalrml   | 26,96 | 7,34  |
| 69 | tnhyllwafagalrhyf  | 16,58 | 2,85 | vgskewifygllshfy  | 25,21 | 3,46 | ttqwdwaaagalrhw    | 34,17  | 3,99  | nwkwnwvdtlshfl    | 26,29 | 7,16  |
| 70 | tgskwnwafagalrhyf  | 16,55 | 2,85 | asqhlqkagalrhm    | 25,10 | 3,44 | vakkeqwwagllshfl   | 33,69  | 3,93  | tnkdwnwvagalrhl   | 25,97 | 7,07  |
| 71 | asqrlqwagalrhyf    | 16,40 | 2,82 | wqwwlwfagalrcfl   | 25,08 | 3,44 | tswevwnwafagalrhm  | 33,66  | 3,93  | wqwwlhwaaalrml    | 25,58 | 6,97  |
| 72 | tnhyllwvafagalrhyf | 16,40 | 2,82 | tnnalswafagaqrhfy | 24,48 | 3,36 | wqywsvifgtrlrgfk   | 32,98  | 3,85  | nwkwnnwagasrql    | 25,00 | 6,81  |
| 73 | cnwylwvafagalrhyf  | 16,34 | 2,81 | asprlqwvagalrhyf  | 24,44 | 3,35 | tsqeltwafagalrkhf  | 32,91  | 3,84  | wqwwknsfagalrml   | 24,99 | 6,80  |
| 74 | vwstlqfagalrhyf    | 16,34 | 2,81 | tnhyllwvagalrhmfl | 24,21 | 3,32 | qnkewvifagalrhm    | 32,65  | 3,81  | tnwllhwvagalrhmfl | 23,61 | 6,43  |
| 75 | tnyvtwafagalrkfl   | 16,28 | 2,80 | tnhyllwvagalrhm   | 24,13 | 3,31 | takvwnwagalrcfl    | 32,06  | 3,74  | wqwwlhwvagalrhm   | 23,03 | 6,27  |
| 76 | anhyllwvagalrhl    | 16,27 | 2,80 | tnkwnwvagalrshfy  | 23,90 | 3,28 | wqywtwvagyqwhfh    | 31,99  | 3,73  | hssdwnwagaalrkfl  | 22,99 | 6,26  |
| 77 | lneyllwafagalrhm   | 16,24 | 2,79 | thwylwvagalrhm    | 23,75 | 3,26 | pqkevhwvagalrhm    | 31,48  | 3,67  | vskwnwatalakwl    | 22,95 | 6,25  |
| 78 | tnhyllwafagalrhyf  | 16,13 | 2,77 | tkhyllwvagalrhyf  | 23,64 | 3,24 | pnkevhwvagalrhl    | 31,39  | 3,66  | nwkwnwvagaalrhl   | 22,84 | 6,22  |
| 79 | thhyllwafagalrhyf  | 16,08 | 2,77 | wqwwltwagalrhm    | 23,37 | 3,21 | ttqevqwwagalrhm    | 31,37  | 3,66  | wqwwlhwvagalrhm   | 22,53 | 6,13  |
| 80 | tnhrllqfagalwhfh   | 16,03 | 2,76 | dtqdwvafagalrhm   | 23,04 | 3,16 | tnwvwwvagalrhm     | 31,06  | 3,62  | ygwwqwwagalrhm    | 22,23 | 6,05  |
| 81 | vqpkwnwafagalrhd   | 16,02 | 2,75 | tnkqtnwvagalrhl   | 22,96 | 3,15 | vakkewifagalrhm    | 30,85  | 3,60  | pnkkwqwwagalrhm   | 22,23 | 6,05  |
| 82 | tnqrlwafagalrhm    | 15,88 | 2,73 | vaskvqwwagalrkfl  | 22,83 | 3,13 | tnselwvagalrhm     | 30,68  | 3,58  | qnkwllhwaaalrml   | 22,07 | 6,01  |
| 83 | asvylwvafagalrhd   | 15,73 | 2,71 | vaakwvafagalrhyf  | 22,71 | 3,12 | tsqevqswagalrhm    | 30,62  | 3,57  | wqkewvayagalrhm   | 21,85 | 5,95  |
| 84 | lnhyllwvagalrhyf   | 15,73 | 2,70 | tnkwnwvagalrhm    | 22,66 | 3,11 | ttqcmwvagalrhl     | 30,59  | 3,57  | tgkewnwvagalrhm   | 21,73 | 5,92  |
| 85 | tnhyllwafagalrhm   | 15,45 | 2,66 | mqgwhwifavalrhm   | 22,56 | 3,10 | tnmevqwwagalrhm    | 29,74  | 3,47  | takvdrwvagalrhl   | 21,71 | 5,91  |
| 86 | tnerlnwvafagalrhm  | 15,44 | 2,66 | lmyqtwafagalrhm   | 22,50 | 3,09 | wnpevqwwagalrhm    | 29,62  | 3,46  | wkwllhwvagalrhm   | 21,70 | 5,91  |
| 87 | tnqylwvafagalrhm   | 15,38 | 2,64 | tnndlqwwagalrhm   | 22,39 | 3,07 | wnkecnwvagalrhm    | 29,53  | 3,45  | wqwwlhwvagalrhm   | 21,60 | 5,88  |

|     |                    |       |      |                    |       |      |                   |       |      |                   |       |      |
|-----|--------------------|-------|------|--------------------|-------|------|-------------------|-------|------|-------------------|-------|------|
| 95  | tnhylvfagalarqfy   | 14,87 | 2,56 | vaskewifygtsrqpy   | 21,78 | 2,99 | wnwnlwdfegalarhfy | 27,40 | 3,20 | vaykwnwagalarml   | 18,82 | 5,12 |
| 96  | dsqrlqgwagalarhwh  | 14,72 | 2,53 | tnhymllfagalwhfh   | 21,64 | 2,97 | vpkelewagalarhfl  | 27,17 | 3,17 | tqhelhwaealarml   | 18,67 | 5,08 |
| 97  | tnnyylvfagvqrhfy   | 14,69 | 2,53 | vnknkwvagalrhyf    | 21,19 | 2,91 | vgskewifygalvmlf  | 26,85 | 3,13 | vaskwnwagalarhwh  | 17,72 | 4,82 |
| 98  | tnkkwnwvagalrhyf   | 14,25 | 2,45 | tnykslwfagalrhl    | 21,16 | 2,90 | tnpevqwsagalrtwl  | 26,83 | 3,13 | tqkewwvagalrqlf   | 17,62 | 4,80 |
| 99  | vgskwnwvagalrhyf   | 14,08 | 2,42 | tnyvvwnfagalmhay   | 21,02 | 2,88 | tqywlmwfavalrhl   | 26,76 | 3,12 | wqwwlpdfagalrhhk  | 17,44 | 4,75 |
| 100 | lnhylvfagalarqfy   | 13,80 | 2,37 | tnnyllyfagalrkss   | 20,88 | 2,86 | apevqvwgalrlshfy  | 26,69 | 3,11 | tdavwnwvagalrhl   | 17,34 | 4,72 |
| 101 | aqwylswkcgalarhfy  | 13,79 | 2,37 | tnkkewifyalrhhfd   | 20,80 | 2,85 | ttkvwvwwagalrpy   | 26,61 | 3,11 | vmykwwvngalrefl   | 17,32 | 4,72 |
| 102 | lehlrgwfvagalrwhf  | 13,70 | 2,36 | tnkqwnwfkghlwhfl   | 20,47 | 2,81 | tnkkewwfvavalrhyf | 26,48 | 3,09 | wkwhlhwfdgalrklf  | 17,13 | 4,66 |
| 103 | yhhylkwfagalrhyf   | 13,65 | 2,35 | tntylwwfvagalrvfl  | 20,42 | 2,80 | wnpelwfvagalrkml  | 26,33 | 3,07 | tqkewqswalvlakwl  | 17,11 | 4,66 |
| 104 | tnhylvwfvghlrrhfh  | 13,61 | 2,34 | takkewifogalrghf   | 20,38 | 2,80 | asqglwaaagalrwhf  | 26,03 | 3,04 | tnkawqwgagalarml  | 16,47 | 4,48 |
| 105 | lnsylvwfvagalarhfy | 13,57 | 2,33 | tnykwnwfvagtlrhfp  | 20,25 | 2,78 | asvwlqlwagalrml   | 25,75 | 3,01 | qkqqlhwfdgalrklf  | 16,36 | 4,45 |
| 106 | ecskwnwfvagalrhyf  | 13,52 | 2,32 | vaskwqwwagalarhfl  | 20,03 | 2,75 | pnvevhwvagalrmls  | 25,71 | 3,00 | ymskqwwaaalarkeh  | 16,33 | 4,45 |
| 107 | tqwwlpofagalrhyf   | 13,44 | 2,31 | veskhwifagalrsmf   | 19,79 | 2,72 | tacvwnyagalrhyf   | 25,40 | 2,96 | tnkdwnswagalrml   | 16,23 | 4,42 |
| 108 | asqrlqgwagslqhfy   | 13,21 | 2,27 | vykkwqwwagalarhfy  | 19,57 | 2,69 | wqywlwqgdalrml    | 25,31 | 2,95 | nkwkvnwvngalrml   | 15,84 | 4,31 |
| 109 | tnskwnwfvagalrtyf  | 13,00 | 2,24 | vgskewifygtlayfy   | 19,50 | 2,67 | kkkewwvagalrhyf   | 25,08 | 2,93 | tnkdwnwvsgalrkfs  | 15,54 | 4,23 |
| 110 | tnkqwnlfgalarhfy   | 12,99 | 2,23 | tnhyslwfagaltvhfm  | 19,46 | 2,67 | tnkkewifogalrghf  | 24,83 | 2,90 | qahkyqwwngalshwy  | 15,52 | 4,22 |
| 111 | ttlylqwfakalarhfy  | 12,98 | 2,23 | wnhlywfvagtlrhfs   | 19,32 | 2,65 | nwkswpwtvagalrhw  | 24,12 | 2,81 | tnkevhwvtaalarcwl | 14,27 | 3,88 |
| 112 | tnnelqwfagalrhyf   | 12,78 | 2,20 | tqyqlwvagalrhyf    | 19,21 | 2,64 | tnkkewifogalrswl  | 24,03 | 2,80 | twkknwvngalrml    | 14,05 | 3,83 |
| 113 | ldhaewifogalarqfy  | 12,67 | 2,18 | vadaskwfvagalrhm   | 19,13 | 2,62 | thnlwlvfvtatrkml  | 23,89 | 2,79 | vaskwnyagalrklf   | 13,59 | 3,70 |
| 114 | vqqqlgwfvagtlrhfd  | 12,58 | 2,16 | tewldwfvwalrhef    | 19,13 | 2,62 | tykkwvifygalrghf  | 23,87 | 2,79 | tnqrlqcygllrqlf   | 13,54 | 3,69 |
| 115 | tchylwfvagalrhd    | 12,53 | 2,15 | tnwevqwwagalqmwf   | 19,03 | 2,61 | wnkevswdgalymwl   | 23,02 | 2,69 | wnyevkswahalarml  | 13,33 | 3,63 |
| 116 | asskwnfvagalrhyf   | 12,34 | 2,12 | mtywvhwifagalrhhfd | 18,91 | 2,59 | wpgwldwvagalrhw   | 21,93 | 2,56 | tsqewnwvngalrkfa  | 13,22 | 3,60 |
| 117 | tnmylwhfvagalrhd   | 12,33 | 2,12 | asadlqwwtgalrkft   | 18,58 | 2,55 | asmevqwwagacrklf  | 21,23 | 2,48 | pskevhwvagalrml   | 12,82 | 3,49 |
| 118 | lnhylvdfagalarhfy  | 12,32 | 2,12 | tnwvhwifagaeahfd   | 18,50 | 2,54 | asmkqwwagavkrkfy  | 20,89 | 2,44 | tsqelgwagallshcl  | 12,67 | 3,45 |
| 119 | tnhylvwfvagalrhyf  | 12,30 | 2,11 | tnknwnwvagalrghf   | 18,20 | 2,50 | nsnrlqwfagalrnyf  | 20,80 | 2,43 | paskwnwvagalrkl   | 12,62 | 3,44 |
| 120 | tnqtlqwfagalrhyf   | 12,27 | 2,11 | tnkqwnwfvagalrhy   | 18,19 | 2,49 | vgskewifogalrml   | 19,34 | 2,26 | takknwvngalrklf   | 12,43 | 3,38 |
| 121 | tnhylvwfvagalrhd   | 12,24 | 2,11 | asmevqwwagalrmyd   | 18,05 | 2,48 | nskevswdgalrkmf   | 19,12 | 2,23 | cnkavdwvngalrkmd  | 12,35 | 3,36 |
| 122 | egwvqcaagalrhyf    | 12,06 | 2,07 | vgskewifogalrghf   | 17,90 | 2,46 | wppwvwwfvagalrml  | 18,96 | 2,21 | tqglwvwwvagalrky  | 12,30 | 3,35 |
| 123 | vqqqlgwfvagalrhyf  | 11,83 | 2,03 | wqwwlwmfvagtlrhfy  | 17,79 | 2,44 | ttqvnqswagalrml   | 18,77 | 2,19 | tykdwnpvdalrml    | 12,22 | 3,33 |
| 124 | ynnrqwfagalrhyf    | 11,79 | 2,03 | mqghwfvagalrhyf    | 17,26 | 2,37 | asqnlwdfagalrhyf  | 18,69 | 2,18 | hqyavqwwagashfl   | 12,10 | 3,29 |
| 125 | tnnrlqwfagalrhyf   | 11,78 | 2,03 | vashwqwwvagalrklf  | 17,05 | 2,34 | tnkewifogalrghf   | 18,69 | 2,18 | qnkevhwvagalrml   | 11,97 | 3,26 |
| 126 | asqrlqgwagalrnyf   | 11,77 | 2,02 | atqmdwfvagalrhl    | 16,44 | 2,25 | ymskqwwvagalrghf  | 18,58 | 2,17 | tnkawqwwagalrml   | 11,74 | 3,20 |
| 127 | lqwwlqcgagalrhyf   | 11,71 | 2,01 | asqnlqwfagalrhyf   | 16,39 | 2,25 | tnkewqvcagalrhl   | 18,42 | 2,15 | hsywtqyfhadalrml  | 11,47 | 3,12 |
| 128 | tnkkwnwvagalrhyf   | 11,66 | 2,01 | mqkvwvwwagacrhyf   | 16,35 | 2,24 | psqglwvagalrhw    | 18,12 | 2,11 | hnkevhwvagalrml   | 11,18 | 3,04 |
| 129 | tnhylvwfvagalrhyf  | 11,62 | 2,00 | tnhyslwfagalrhhk   | 16,34 | 2,24 | pnknwnwvagalrslf  | 17,83 | 2,08 | tnkewwfvagalrklf  | 10,99 | 2,99 |
| 130 | tnhylvwfvagalrhyf  | 11,46 | 1,97 | tnkqwnwfvagalrhyf  | 16,08 | 2,21 | tnqrkqwwvagalrghf | 17,76 | 2,07 | ymskqwwvagalrml   | 10,85 | 2,95 |
| 131 | tnhylvwfvagalrhyf  | 11,45 | 1,97 | tnhrylqwgalarhfl   | 15,97 | 2,19 | hsqglwvagalrklf   | 17,54 | 2,05 | nkyenwvtdalrkl    | 10,78 | 2,93 |
| 132 | tnkketwfvagalrhyf  | 11,43 | 1,97 | lnwypwfvagalrmy    | 15,82 | 2,17 | stqglwdfvagalrghf | 17,26 | 2,01 | tnsdqlwvagalrkl   | 10,71 | 2,92 |
| 133 | vgwvqcfvagalrhyf   | 11,17 | 1,92 | tnwvtdwfvagalrhyf  | 15,65 | 2,15 | pnkyvvcwslalrml   | 17,16 | 2,00 | wqewwvfwagalrml   | 10,70 | 2,91 |
| 134 | qnhylyfvagalrhyf   | 10,94 | 1,88 | aakkmwfvagalrhyf   | 15,41 | 2,11 | vakkwqwwvagalrklf | 17,11 | 2,00 | tqkewnwvagalrklf  | 10,55 | 2,87 |
| 135 | thhrlwvagalrhyf    | 10,91 | 1,88 | tqwnlwfagalrhyf    | 15,37 | 2,11 | tsgevqswvagalrghf | 17,04 | 1,99 | nknwnwvagalrklf   | 10,53 | 2,87 |
| 136 | thhylvwfvagalrhyf  | 10,79 | 1,86 | lsqrlwfvagalrhyf   | 15,31 | 2,10 | tnhkewvagalrhyf   | 16,81 | 1,96 | tqknwnwvagalrklf  | 10,42 | 2,84 |
| 137 | tnqelwfvagalrhyf   | 10,75 | 1,85 | wnkqpdwfvagalrhl   | 15,26 | 2,09 | vakkwqwwvagalrklf | 16,78 | 1,96 | thqetqtwagalrml   | 9,66  | 2,63 |
| 138 | tnhrlwfvagalrhyf   | 10,70 | 1,84 | tnnrlqwgalarhfl    | 15,12 | 2,07 | ttkellwvagalrklf  | 16,42 | 1,92 | tsqglwvagalrml    | 9,27  | 2,52 |
| 139 | wngmlqwgalarhfy    | 10,69 | 1,84 | tnhyslwfagalrhl    | 14,73 | 2,02 | pnkevhwvagalrklf  | 16,39 | 1,91 | takvwnwvagalrhl   | 9,26  | 2,52 |
| 140 | tnkkewvfvagalrhyf  | 10,53 | 1,81 | tnykwnwfvagalrmy   | 14,73 | 2,02 | wqkewvfvagalrghf  | 16,14 | 1,88 | tnqrkqwwagalrml   | 9,20  | 2,50 |
| 141 | asqrlqgwagalrhyf   | 10,39 | 1,79 | tnhylvwfvagalrhyf  | 14,70 | 2,02 | qsgevqswvagalrml  | 15,98 | 1,86 | aqkewvfwagalrhl   | 9,13  | 2,48 |
| 142 | tnhylvwfvagalrhyf  | 10,37 | 1,78 | tnmewwfvagalrhyf   | 14,52 | 1,99 | wnvwnwvagalrklf   | 15,95 | 1,86 | wlwpnlwfvagalrml  | 8,90  | 2,42 |
| 143 | tnhylvwfvagalrhyf  | 10,31 | 1,77 | asmevqwwagalarhfy  | 14,46 | 1,98 | thpevqwwagalrghf  | 15,27 | 1,78 | qtkkwnwvagalrml   | 8,50  | 2,31 |
| 144 | tnhyslwfagalrhyf   | 10,07 | 1,73 | kgwvhwfvagalrghf   | 14,36 | 1,97 | asywlvwvagalrklf  | 15,22 | 1,78 | ymskvwvagalrml    | 8,40  | 2,29 |
| 145 | ecqrtqcfvagalrhyf  | 10,00 | 1,72 | tnkkewvagalrklf    | 14,15 | 1,94 | vashwqwwvagalrghf | 15,12 | 1,76 | tqkewnwvagalrml   | 8,07  | 2,20 |
| 146 | vgwvqcfvagalrhyf   | 9,80  | 1,69 | vaskwvwwvagalrklf  | 14,08 | 1,93 | tnqrqtwfvagalrklf | 14,58 | 1,70 | tnqetqswagalrml   | 7,94  | 2,16 |
| 147 | tnnrlqwfagalrhyf   | 9,76  | 1,68 | tqglwdfvagalrghf   | 13,82 | 1,90 | nwlhwnwvagalrklf  | 14,49 | 1,69 | tagvwnwvagalrml   | 7,92  | 2,16 |
| 148 | astrlqgwagalrhyf   | 9,60  | 1,65 | tnkkewvagalrklf    | 13,73 | 1,88 | asmevqwwagalarhfl | 14,39 | 1,68 | ymskqwwvagalrml   | 7,80  | 2,12 |
| 149 | tnkqslwfvagalrhyf  | 9,52  | 1,64 | asqrlqgwagalrhyf   | 13,62 | 1,87 | vmskhtwvagalrklf  | 13,99 | 1,63 | qnkevhwvagalrml   | 7,62  | 2,07 |
| 150 | nshylvwfvagalrhyf  | 9,32  | 1,60 | tnknwnwfvagalrhl   | 13,41 | 1,84 | tnkellwvagalrhyf  | 13,82 | 1,61 | qnhevhwvagalrhyf  | 7,61  | 2,07 |
| 151 | vgwvqcfvagalrhyf   | 9,31  | 1,60 | tnkeewvagalrhyf    | 13,25 | 1,82 | lakvwnwvagalrghf  | 13,52 | 1,58 | wpclewfvagalrml   | 7,52  | 2,05 |
| 152 | vgqwnwfvagalrhyf   | 8,95  | 1,54 | tnkkewvfwagalrghf  | 13,20 | 1,81 | thpevqwwagalrghf  | 13,49 | 1,57 | hqkewvfwagalrml   | 7,48  | 2,04 |
| 153 | tnkkqwfagalrhyf    | 8,90  | 1,53 | tnkaewvfwagalrklf  | 13,10 | 1,80 | lknrlqwwvagalrhl  | 13,46 | 1,57 | mnkethwvagalrhl   | 7,36  | 2,00 |
| 154 | tnkkewvadalrhyf    | 8,76  | 1,51 | tnnylvwfvagalrklf  | 12,92 | 1,77 | vakkwqwwvagalrghf | 13,33 | 1,56 | nknwnwvagalrklf   | 7,17  | 1,95 |
| 155 | asqrlqgwagalrhyf   | 8,66  | 1,49 | tnnaysfvagalrhyf   | 12,53 | 1,72 | tnnrlqgwagalrghf  | 12,42 | 1,45 | vskkwnwvagalrml   | 7,02  | 1,91 |
| 156 | avewlqcfvagalrhyf  | 8,60  | 1,48 | tnkkwvfwagalrhyf   | 12,46 | 1,71 | tsgevqswvagalrml  | 12,15 | 1,42 | pnkvlwvagalrklf   | 6,85  | 1,86 |
| 157 | cgkknwvagalrhyf    | 8,52  | 1,46 | tnnrlqgwagalrklf   | 12,16 | 1,67 | vasqvwvagalrml    | 12,14 | 1,42 | pnkevhwvagalrklf  | 6,83  | 1,86 |
| 158 | lnhylvwfvagalrhyf  | 8,23  | 1,41 | tnknwnwfvagalrhl   | 11,73 | 1,61 | pnkevhwvagalrklf  | 12,04 | 1,40 | ymskwnwvagalrklf  | 6,43  | 1,75 |
| 159 | tnnslwfvagalrhyf   | 8,18  | 1,41 | tnkknwfvagalrhl    | 11,69 | 1,60 | tnkewwvagalrghf   | 12,01 | 1,40 | pnqrlqgwagalrklf  | 6,43  | 1,75 |
| 160 | tnkketwfvagalrhyf  | 8,14  | 1,40 | tnkvlwfvagalrhl    | 11,46 | 1,57 | tkwvqwwvagalrml   | 11,65 | 1,36 | qakewnwvagalrml   | 6,21  | 1,69 |
| 161 | tnhylvwfvagalrhyf  | 8,10  | 1,39 | tnkeevqwwagalrml   | 11,40 | 1,56 | tnkkehfvagalrml   | 11,40 | 1,33 | qnkevhwvagalrml   | 5,83  | 1,59 |
| 162 | qnhylyfvagalrhyf   | 7,96  | 1,37 | tnkrlhwvagalrhl    | 11,35 | 1,56 | vmskqwwvagalrklf  | 11,24 | 1,31 | vaskwnwvagalrklf  | 5,74  | 1,56 |
| 163 | asqrlqgwagalrhyf   | 7,90  | 1,36 | kdkkewvfwagalrklf  | 11,34 | 1,56 | vakkwqwwvagalrghf | 10,98 | 1,28 | hqywtqewvagalrml  | 5,70  | 1,55 |
| 164 | tnhrylqwfagalrhyf  | 7,85  | 1,35 | tnpewwfvagalrhyf   | 11,10 | 1,52 | thpevqwwagalrklf  | 10,50 | 1,23 | vseevqwwagalrklf  | 5,61  | 1,53 |
| 165 | tnhrlwfvagalrhyf   | 7,84  | 1,35 | tnkewwfvagalrklf   | 10,96 | 1,50 | pnkevhwvagalrklf  | 10,29 | 1,20 | pnkevhwvagalrklf  | 5,45  | 1,48 |
| 166 | tnqtlqwfagalrhd    | 7,18  | 1,23 | tnkvmwvagalrhl     | 10,13 | 1,39 | tnmednwvagalrghf  | 9,95  | 1,16 | hqycqtwfvagalrghf | 5,26  | 1,43 |
| 167 | lnhylvwfvagalrhyf  | 7,03  | 1,21 | tnnalqgwagalrhyf   | 9,42  | 1,29 | tnkelpwfvagalrml  | 9,52  | 1,11 | tnqetesvagalrml   | 4,72  | 1,28 |
| 168 | ltqrlwfvagalrhyf   | 7,00  | 1,20 | asqrlqgwagalrklf   | 8,90  | 1,22 | tnknetnwvagalrklf | 9,09  | 1,06 | qnkevhwvagalrml   | 4,70  | 1,28 |
| 169 | tnkketwfvagalrhyf  | 6,90  | 1,19 | tnkyewwvagalrklf   | 8,54  | 1,17 | tnkelnwvagalrklf  | 8,09  | 0,94 | teesvqwwvagalrml  | 4,57  | 1,24 |
| 170 | anhrqgwvagalrwhf   | 6,76  | 1,16 | amekqwwvagalrks    | 8,26  | 1,13 | tpknwnwvagalrklf  | 7,41  | 0,86 | nknwvfwagalrklf   | 4,51  | 1,23 |
| 171 | aaqrlwvagalrklf    | 6,71  | 1,15 | tsqrlwfvagalrklf   | 7,96  | 1,09 | pnkevhwvagalrklf  | 7,35  | 0,86 | nwkrlqwygllrqlf   | 3,69  | 1,00 |
| 172 | knhranwfvagalrhyf  | 6,63  | 1,14 | vaskwvfwagalrghf   | 7,90  | 1,08 | asmevqwwagalarhfl | 7,34  | 0,86 | qnkvvhwvagalrml   | 3,25  | 0,88 |
| 173 | asqpcqwwvagalrklf  | 6,25  | 1,07 | lsqrlqgwagalrghf   | 7,35  | 1,01 | pnkevhwvagalrklf  | 6,82  | 0,80 | takvwnwvagalrhl   | 3,57  | 0,70 |
| 174 | lqnylqgwagalrhyf   | 5,87  | 1,01 | hnhyslwfagalrklf   | 7,30  | 1,00 | ttqweddagvagalrml | 6,28  | 0,73 | nknwnwvagalrhl    | 2,52  | 0,69 |
| 175 | tnhrlwfvagalrhyf   | 5,73  | 0,99 | anhywvfwagalrghf   | 6,86  | 0,94 | wnkkedfvagalrghf  | 6,11  | 0,71 | tnkewnwvagalrml   | 2,48  | 0,67 |
| 176 | thhrlwfvagalrhyf   | 5,66  | 0,97 | tnkkepifvagalrghf  | 6,75  | 0,93 | tnkewnwvagalrml   | 5,94  | 0,69 | tqkewnwvagalrml   | 2,06  | 0,56 |
| 177 | tnkkewvfwagalrhyf  | 5,58  | 0,96 | wnkqpnwfvagalrklf  | 6,61  | 0,91 | tnskeefvagalrghf  | 5,42  | 0,63 | tnqrqtwvagalrml   | 2,02  | 0,55 |
| 178 | tnnrlqgwagalrhyf   | 5,53  | 0,95 | tlkkkepifvagalrghf | 6,39  | 0,88 | snkewvfwagalrghf  | 5,28  | 0,62 | tnkawqswvagalrklf | 1,97  | 0,54 |
| 179 | dlktekfvdgalrghf   | 5,50  | 0,95 | tsqrqwwvagalrklf   | 6,19  | 0,85 | tnkkewvfwagalrml  | 5,21  | 0,61 | mnkevhwvagalrml   | 1,90  | 0,52 |
| 180 | tnhylvwfvagalrhyf  | 5,15  | 0,89 | tnhyslwfagalrhyf   | 6,19  | 0,85 | ynkhsnwvagalrml   | 5,17  | 0,60 | tnkdwnwvagalrml   | 1,84  | 0,50 |
| 181 | tnhylvwfvagalrhyf  | 5,12  | 0,88 | tnkrlqgwagalrklf   | 6,18  | 0,85 | tnvenhwvagalrml   | 5,13  | 0,60 | hhywtqewvagalrklf | 1,53  | 0,42 |
| 182 | tnkkwnwvagalr      |       |      |                    |       |      |                   |       |      |                   |       |      |

|     |                       |          |          |                       |          |          |                       |          |          |                       |          |          |
|-----|-----------------------|----------|----------|-----------------------|----------|----------|-----------------------|----------|----------|-----------------------|----------|----------|
| 191 | tnhrlmqfagparhfy      | 3,49     | 0,60     | tnckpwydygylrkmv      | 3,38     | 0,46     | tnqrlqwwagqdtkfl      | 2,55     | 0,30     | ncaknwwagdermfe       | 0,24     | 0,06     |
| 192 | tnkkemifagslrqfy      | 3,47     | 0,60     | tnkkewcdygalrqfh      | 3,16     | 0,43     | pnkeehwwdgahrmfl      | 1,78     | 0,21     | vasklnwngagrmfl       | 0,24     | 0,06     |
| 193 | tnyelvimygalrqdy      | 2,98     | 0,51     | tsqrlqwwaganrqfy      | 1,95     | 0,27     | tsqevqscagalrkfc      | 1,44     | 0,17     | tgkeqcschdalmwl       | 0,22     | 0,06     |
| 194 | tnhyllwtpagaqrhfs     | 2,87     | 0,49     | asqdlnycagalrcfy      | 1,56     | 0,21     | plkevhwdcgwvdmtdl     | 0,94     | 0,11     | tgqevqspagalrawl      | 0,09     | 0,02     |
| 195 | tnkkeqwfagqlrhfy      | 2,68     | 0,46     | tnktwnwnagadrqfs      | 1,29     | 0,18     | wnkkeqifygalpoms      | 0,90     | 0,11     | tnqetqswagacrmfl      | 0,07     | 0,02     |
| 196 | tnslmlwkatelrany      | 2,32     | 0,40     | asqngwvnanqrhfy       | 1,06     | 0,15     | tspecywkagatrmnl      | 0,87     | 0,10     | tnkevevwdgaermwl      | 0,03     | 0,01     |
| 197 | nnktensfalalrhew      | 2,22     | 0,38     | vaskeqiwaganrqly      | 0,89     | 0,12     | vaskwqwpagadrmwm      | 0,82     | 0,10     | vaekwemttaglpewy      | 0,02     | 0,00     |
| 198 | qnhsqwikhkalskfd      | 1,70     | 0,29     | tnnascwpagalrpfm      | 0,47     | 0,06     | pnkelndwagaaspkfl     | 0,24     | 0,03     | tdqevqswagalpmvl      | 0,00     | 0,00     |
| 199 | tnqtlqhfagyhrtqy      | 1,62     | 0,28     | tnkepnefagalrhfd      | 0,31     | 0,04     | tnqelnqsanahqksl      | 0,07     | 0,01     | tgktdqcdagalrmvl      | -0,05    | -0,01    |
| 200 | tcскеiefagahrmfy      | 1,27     | 0,22     | vgskeqifdgaerkfl      | -0,03    | 0,00     | wnketnwtataltkel      | 0,02     | 0,00     | tnqeeqseagalrmfl      | -0,06    | -0,01    |
|     | <b>Lead from Gen4</b> | <b>x</b> | <b>c</b> | <b>Lead from Gen5</b> | <b>x</b> | <b>c</b> | <b>Lead from Gen6</b> | <b>x</b> | <b>c</b> | <b>Lead from Gen7</b> | <b>x</b> | <b>c</b> |
|     | asqrlqwwagalrkfl      | 27,47    | 4,72     | tnkewnwifagalrhfy     | 37,47    | 5,14     | pnkevhwdgalrmwl       | 86,14    | 10,05    | nwknwnwagalrmfl       | 62,44    | 17,00    |
|     | tnkkewifygalrqfy      | 21,19    | 3,64     | vaskwqwwagalrkfl      | 44,27    | 6,07     | tsqevqswagalrmwl      | 51,98    | 6,07     | tnkdwntwagalrkfl      | 46,61    | 12,69    |
|     | tnkqwnwifagalrhfy     | 23,44    | 4,03     | tnkkewifygalrqfs      | 32,73    | 4,49     | tnkewnwifagalrmfl     | 44,25    | 5,16     | tnkewnwifagalrmvl     | 21,31    | 5,80     |
|     | tnqrlqwwagalrhfy      | 17,89    | 3,08     | vgskeqifdgaerkfl      | 33,15    | 4,55     | tnkelnwagalrkfl       | 43,98    | 5,13     | qnkevhwdgalrmwl       | 13,07    | 3,56     |
|     | tnnrqwwifagalrhfy     | 20,44    | 3,52     | wqwwlwfagalrhay       | 35,65    | 4,89     | wkwllwifagalrkfh      | 60,50    | 7,06     | ymskwqwwagalrmfl      | 30,27    | 8,24     |
|     | qnhyllwifagalrhfd     | 16,97    | 2,92     | ttqglwdwifagalrhfl    | 38,43    | 5,27     | ttqglwdwifagalrhws    | 47,17    | 5,50     | pnkevhwdgalrmvl       | 11,36    | 3,09     |
|     | tnwylwifagalrhfh      | 18,63    | 3,20     | mqwwhifagalrhfd       | 31,20    | 4,28     | asqvlqwwagalrqfy      | 52,44    | 6,12     | wqwwlwfagalrmfl       | 34,25    | 9,33     |
|     | aqwllqcfagalrhfy      | 16,34    | 2,81     | tnkwnnwifagalrcfy     | 33,96    | 4,66     | vakkwqwwagllshfy      | 58,64    | 6,84     | tnqrlqwwyglrlqfl      | 24,23    | 6,60     |
|     | vgskwnwifagalrhfy     | 13,56    | 2,33     | tnnrqwwagalrkfl       | 33,90    | 4,65     | vmskwqwwagalrkfl      | 57,15    | 6,67     | vaskwnwagqlrkwl       | 26,27    | 7,15     |
|     | tnhyllwifagalrhfy     | 16,03    | 2,76     | tnkkewifygalrqfy      | 30,14    | 4,14     | takwnnwagalrkfl       | 59,38    | 6,93     | tgkewnwifagalrhwl     | 22,53    | 6,13     |
|     | tnhyllwifagalrhfy     | 20,60    | 3,54     | lsqrlqwwagalrkfl      | 32,75    | 4,49     | wqwwlwfagalrhfl       | 47,95    | 5,60     | wkwllwifagalrkfl      | 35,26    | 9,60     |
|     | tnhyllwifagalrhfs     | 21,69    | 3,73     | asmevqwwagalrmwl      | 30,80    | 4,23     | wqwwlwfagalrkml       | 41,86    | 4,89     | tsqevqswagalrmvl      | 9,33     | 2,54     |
|     | tnhyllwifagalrhfy     | 16,24    | 2,79     | asqdlqwwagalrhfy      | 37,16    | 5,10     | thpevqwwagalrmwl      | 44,70    | 5,22     | qakkwqwwagllshfl      | 34,58    | 9,42     |
|     | tnqtlqwwagalrhfy      | 16,21    | 2,79     | tnhyllwifagalrkfl     | 30,23    | 4,15     | vaskwqwwagalrkfl      | 53,02    | 6,19     | pnkkwqwwagllshwy      | 37,60    | 10,24    |
|     | lnhalswifagalrhfy     | 18,70    | 3,22     | tnknwnwifagalrhfy     | 26,53    | 3,64     | nwknwnwifagalrkfc     | 40,21    | 4,69     | tnqetqswagalrmvl      | 8,09     | 2,20     |
|     | lnhyllwifagalrhfy     | 17,24    | 2,97     | tsqrlqwwagalrkfl      | 28,60    | 3,92     | tnkewnwifagalrhfy     | 41,73    | 4,87     | wkwllwifagalrkfl      | 34,72    | 9,45     |
|     | tnhrlwifalfyrcfth     | 14,39    | 2,48     | asqrlqwwagalrhfy      | 28,29    | 3,88     | tnkkewifygalrqfs      | 38,29    | 4,47     | nwknwnwifadalrkwl     | 34,40    | 9,37     |
|     | tnkkwnwifagalrhfy     | 16,20    | 2,79     | tnwylwifagalrkfl      | 24,32    | 3,34     | tnwnlwifagalrhfy      | 39,52    | 4,61     | tnkawqwwagalrhfl      | 42,14    | 11,47    |
|     | tnkkewifagalrqfy      | 18,92    | 3,25     | tnyknwifagalrhfy      | 25,81    | 3,54     | asmevqwwagalrmfl      | 35,59    | 4,15     | wqwwlwfagalrhfl       | 33,21    | 9,04     |
|     | tnnyllwifagalrnfld    | 17,02    | 2,93     | tnnalswifagalrhfy     | 31,84    | 4,37     | tnqrlqwwyglrlqfl      | 52,53    | 6,13     | wqwwlwfvgayrkmd       | 33,18    | 9,03     |
|     | ecqrtqwwifagalrhfy    | 12,09    | 2,08     | wnkqpnwifagalrhfh     | 35,41    | 4,86     | vgskeqifdgaerkfl      | 48,51    | 5,66     | vmskwqwwagalrmfl      | 28,84    | 7,85     |
|     | lnhyllwifagparhfy     | 12,45    | 2,14     | tnhysllwifagalrhfm    | 33,69    | 4,62     | wqywlwifadalrhfl      | 42,50    | 4,96     | hgywqwtwifadalrqfy    | 20,48    | 5,58     |
|     | lthylqwwifagalrhfy    | 15,15    | 2,61     | tnkkewifygalrkss      | 31,18    | 4,28     | tnkkewifygalrqms      | 49,05    | 5,72     | tnkewnwifagalrmfl     | 17,71    | 4,82     |

|    | Generation 9      | x     | c     | Generation 10      | x      |
|----|-------------------|-------|-------|--------------------|--------|
| 1  | dwknwnwifagalrnf  | 97,47 | 27,26 | dwknwawagalknfl    | 47,705 |
| 2  | dwktwnwifagalrkfl | 93,96 | 26,28 | dwknwnwifagalrkfl  | 34,395 |
| 3  | nwknwewifagalrmvl | 88,94 | 24,88 | dwknwnwifagalrnf   | 32,7   |
| 4  | dwknwnwifagalrnf  | 85,17 | 23,82 | dwktwnwifagalrkfl  | 31,415 |
| 5  | dwknwnwifagalrnf  | 84,82 | 23,72 | dwknwawagalkvfl    | 30,365 |
| 6  | nwknwewifagalrkfl | 83,93 | 23,48 | dwknwnwifagalrnf   | 29,75  |
| 7  | nwknwawagalkkfl   | 79,77 | 22,31 | dwkqwnwifagalrkwl  | 28,21  |
| 8  | nwknwnwifagalrnf  | 79,46 | 22,22 | dwknwswifagalrkfl  | 27,005 |
| 9  | nwknwawifagalrnf  | 78,95 | 22,08 | dpknwswifagalrkfl  | 26,995 |
| 10 | dwknwnwifagalrnf  | 73,12 | 20,45 | dwkewswifagalrkfl  | 26,845 |
| 11 | nwknwewifagalrnf  | 70,37 | 19,68 | dwktwnwifagalrkfl  | 25,92  |
| 12 | nwknwnwifagalrnf  | 67,80 | 18,96 | dwknwnwifagalrnf   | 24,96  |
| 13 | nwknwnwifagalrnf  | 67,30 | 18,82 | awmnwnwifagalrkfl  | 24,56  |
| 14 | dwknwswifagalrhfl | 66,48 | 18,59 | dwknwewifagalrnf   | 24,42  |
| 15 | nwknwawifagalrkfl | 66,21 | 18,52 | ewknwnwifagalrkfl  | 23,725 |
| 16 | nwknwnwifagalrkfl | 64,87 | 18,14 | nwknwawifagalrnf   | 23,71  |
| 17 | wkdwswifagalrnf   | 64,64 | 18,08 | dwknwnwifagalrnf   | 23,64  |
| 18 | nwknwnwifagalrnf  | 63,79 | 17,84 | eqknwewifagalrkfl  | 23,615 |
| 19 | awmnwnwifagalrkfl | 60,02 | 16,79 | dwknwewifagalrnf   | 23,08  |
| 20 | nwknwnwifagalrnf  | 58,85 | 16,46 | dwktwnwifagalrkca  | 22,535 |
| 21 | nwknwswifagalrnf  | 58,21 | 16,28 | dwknwnwifagalrnf   | 21,73  |
| 22 | nwknwnwifagalrnf  | 55,20 | 15,44 | dwkhnwifagalrnf    | 21,635 |
| 23 | nwenwawifagalrkfl | 55,15 | 15,42 | dwknwqwwifagalrnf  | 21,285 |
| 24 | wqknwewifagalrnf  | 53,09 | 14,85 | dwknwntwifagalrnf  | 21,105 |
| 25 | dwknwnwifagalrnf  | 52,71 | 14,74 | dwhnwnwifagalrnf   | 20,945 |
| 26 | lwknwnwifagalrkfl | 52,51 | 14,69 | dwknlewifagalrkfl  | 20,895 |
| 27 | wkdwswifagalrnf   | 51,79 | 14,48 | nwknwewifagalrnf   | 20,79  |
| 28 | hwknwnwifagalrnf  | 51,16 | 14,31 | awdntwnwifagalrkfl | 20,36  |
| 29 | nwknwnwifagalrnf  | 50,58 | 14,15 | nwknwnwifagalrkfl  | 20,355 |
| 30 | pwknwnwifagalrnf  | 49,27 | 13,78 | dwkswnwifagalrnf   | 20,345 |
| 31 | dwanwnwifagalrnf  | 47,76 | 13,36 | dwknwnwifagalrnf   | 20,17  |
| 32 | nwddwnwifagalrkfl | 44,60 | 12,47 | nwnwnwifagalrnf    | 20,095 |
| 33 | vwknwnwifagalrnf  | 44,14 | 12,35 | dwktwnwifagalrkfd  | 19,81  |
| 34 | nwknwifagalrnf    | 43,51 | 12,17 | vwkawewifagalrnf   | 19,465 |
| 35 | nwknwawifagalrkfl | 43,09 | 12,05 | nwknwnwifagalrnf   | 19,225 |
| 36 | dwktwnwifagalrnf  | 42,92 | 12,00 | mwklwnwifagalrnf   | 19,155 |
| 37 | nwknwnwifagalrnf  | 42,83 | 11,98 | nwknwawifagalrnf   | 19,14  |
| 38 | nwknwifagalrnf    | 42,44 | 11,87 | kwawewifagalrnf    | 19,08  |
| 39 | dwnwnwifagalrnf   | 41,65 | 11,65 | dwknwnwifagalrkfl  | 18,86  |
| 40 | nwknwawifagalrnf  | 41,64 | 11,65 | nknwnwifagalrkfl   | 18,82  |
| 41 | twwnwnwifagalrkfl | 39,90 | 11,16 | nwknwawifagalrkfl  | 18,74  |
| 42 | tnkdwnwifagalrnf  | 39,69 | 11,10 | nwknwawifagalrkfl  | 18,67  |
| 43 | nwknwewifagalrnf  | 39,67 | 11,10 | nwktwewifagalrkfl  | 17,935 |
| 44 | vwknwnwifagalrnf  | 39,36 | 11,01 | nwknwawifagalrnf   | 17,675 |
| 45 | nwknwnwifagalrnf  | 38,46 | 10,76 | qwkwnwnwifagalrnf  | 17,49  |
| 46 | pwknwnwifagalrnf  | 38,27 | 10,70 | nwknwnwifagalrnf   | 17,19  |
| 47 | nwknwewifagalrnf  | 37,93 | 10,61 | dwktwnwifagalrnf   | 17,1   |
| 48 | qvknwnwifagalrnf  | 37,04 | 10,36 | dcktnwnwifagalrnf  | 16,91  |
| 49 | tnkdwnwifagalrnf  | 36,73 | 10,27 | nwknwawifagalrnf   | 16,745 |
| 50 | nwknwnwifagalrnf  | 36,71 | 10,27 | dwknwnwifagalrnf   | 16,705 |
| 51 | wqwnwawifagalrkfl | 36,56 | 10,22 | dykdwncwifagalrnf  | 16,675 |
| 52 | tmhnwnwifagalrnf  | 35,83 | 10,02 | nwknwawifagalrnf   | 16,63  |
| 53 | tnqdwswifagalrnf  | 35,58 | 9,95  | ddknwnwifagalrnf   | 16,585 |
| 54 | nwknwewifagalrnf  | 35,08 | 9,81  | nwmtnwnwifagalrkfl | 16,525 |
| 55 | tmpkwawifagalrnf  | 34,72 | 9,71  | nwknwifagalrkfl    | 16,345 |
| 56 | nwknwewifagalrnf  | 34,23 | 9,57  | nwknwawifagalrnf   | 16,23  |
| 57 | twcnwnwifagalrnf  | 34,18 | 9,56  | nwknwnwifagalrnf   | 16,19  |



|     |                       |          |          |                       |          |
|-----|-----------------------|----------|----------|-----------------------|----------|
| 154 | nwynwnwagatamsl       | 12,51    | 3,50     | nwsnwnwngalrmwc       | 8,665    |
| 155 | twknwnwgdalctwy       | 12,09    | 3,38     | nwnkwdwedahdmwl       | 8,64     |
| 156 | mwknwnwagalrqn        | 11,97    | 3,35     | nwnknwnwnahtqhl       | 8,52     |
| 157 | tcqkgwagqlsntl        | 11,93    | 3,34     | nwnknwacagylrwwl      | 8,34     |
| 158 | wcnwnwvwmgrhdl        | 11,67    | 3,26     | dwhnwnwggaykkl        | 8,235    |
| 159 | tvknwnwagplrmfl       | 11,43    | 3,20     | ngknwlvwaeyyrkfn      | 8,21     |
| 160 | tnkdwnwagalmfl        | 11,11    | 3,11     | dwnknwnsamalckfn      | 7,95     |
| 161 | tnkdwnwagalmks        | 10,69    | 2,99     | dwnknwnwdgnlrkwl      | 7,93     |
| 162 | cnkdwnwghalrhtl       | 10,19    | 2,85     | nwnknwvwaearmfl       | 7,87     |
| 163 | nwnknwewagarmfv       | 10,17    | 2,84     | nwnknswwagayrmfn      | 7,8      |
| 164 | wnsswnwagaltqfl       | 10,08    | 2,82     | nwnknwvwaearmwl       | 7,735    |
| 165 | nwnknwnsasaltqfl      | 8,88     | 2,48     | nwnknwewagalmfl       | 7,64     |
| 166 | pnkhwawwagplkkfl      | 8,86     | 2,48     | wqknwewwagalmfl       | 7,47     |
| 167 | nwnknwnwagalmfl       | 8,83     | 2,47     | nwnknwvwaearmfl       | 7,38     |
| 168 | wkktwvfwaklrpel       | 8,77     | 2,45     | nwnknwvwaearmfl       | 7,315    |
| 169 | wqwnwnwgdgprmw        | 8,74     | 2,44     | dwnknwnwvwaearmfl     | 7,3      |
| 170 | qakknwnwadlhrmfl      | 8,09     | 2,26     | nwnknwnwvwaearmfl     | 7,295    |
| 171 | nwnknwnwagalmfl       | 7,29     | 2,04     | nwnknwnwvwaearmfl     | 7,26     |
| 172 | nwnknwvwaearmfl       | 7,25     | 2,03     | wvknwnwvwaearmfl      | 7,015    |
| 173 | wknwnwvwnllrqmy       | 7,02     | 1,96     | nwnknwnwhansllvfn     | 6,995    |
| 174 | twknwnwagalmfl        | 6,59     | 1,84     | wknknwnwanalymfn      | 6,99     |
| 175 | tvqkgwagalmfl         | 6,38     | 1,78     | dwnknwnwagalmfl       | 6,905    |
| 176 | nwnknwvwaearmfl       | 6,00     | 1,68     | nwnknwnwanaprmfn      | 6,525    |
| 177 | nwnknwvwaearmfl       | 5,43     | 1,52     | nwnknwnwagalmfl       | 6,385    |
| 178 | qaklpnwvwaearmfl      | 4,99     | 1,40     | nwnknwnwagalmfl       | 6,25     |
| 179 | qykywvwaearmfl        | 4,80     | 1,34     | nwnknwnwvwaearmfl     | 6,145    |
| 180 | ngknplwvwaearmfl      | 4,73     | 1,32     | nwnknwnwvwaearmfl     | 6,14     |
| 181 | qykywvwaearmfl        | 3,92     | 1,10     | dwnknwnwvwaearmfl     | 6,12     |
| 182 | nwnknwnwvwaearmfl     | 3,66     | 1,02     | dwnknwnwanapymfl      | 6,105    |
| 183 | nwnknwnwvwaearmfl     | 3,50     | 0,98     | dwnknwnwvwaearmfl     | 5,555    |
| 184 | anssnwnwagalmfl       | 3,26     | 0,91     | nwnknwnwvwaearmfl     | 5,34     |
| 185 | nwnknwnwvwaearmfl     | 2,84     | 0,79     | wkknwnwvwaearmfl      | 5,25     |
| 186 | nwnknwnwvwaearmfl     | 2,77     | 0,77     | wkknwnwvwaearmfl      | 5,105    |
| 187 | nwnknwnwvwaearmfl     | 2,72     | 0,76     | nwnknwnwvwaearmfl     | 4,905    |
| 188 | twknwnwvwaearmfl      | 2,51     | 0,70     | dwnknwnwvwaearmfl     | 4,86     |
| 189 | tyknlwvwaearmfl       | 2,34     | 0,65     | nwnknwnwvwaearmfl     | 4,83     |
| 190 | qykywvwaearmfl        | 2,18     | 0,61     | nwnknwnwvwaearmfl     | 4,265    |
| 191 | lssswvwaearmfl        | 1,72     | 0,48     | nwnknwnwvwaearmfl     | 4,145    |
| 192 | qakknwnwvwaearmfl     | 1,70     | 0,47     | nwnknwnwvwaearmfl     | 3,99     |
| 193 | nwnknwnwvwaearmfl     | 1,31     | 0,37     | nwnknwnwvwaearmfl     | 3,91     |
| 194 | tmsnwnwvwaearmfl      | 1,28     | 0,36     | wqknwnwvwaearmfl      | 3,375    |
| 195 | hknwnwnwvwaearmfl     | 1,01     | 0,28     | dwnknwnwvwaearmfl     | 3,015    |
| 196 | wnsswnwvwaearmfl      | 0,80     | 0,22     | dwnknwnwvwaearmfl     | 2,005    |
| 197 | qndwnwnwvwaearmfl     | 0,66     | 0,18     | nwnknwnwvwaearmfl     | 1,815    |
| 198 | nwnknwnwvwaearmfl     | -0,03    | -0,01    | nwnknwnwvwaearmfl     | 1,5      |
| 199 | nwnknwnwvwaearmfl     | -0,32    | -0,09    | dwnknwnwvwaearmfl     | 1,125    |
| 200 | nwnknwnwvwaearmfl     | -0,69    | -0,19    | dwnknwnwvwaearmfl     | 0,58     |
|     | <b>Lead from Gen8</b> | <b>x</b> | <b>c</b> | <b>Lead from Gen9</b> | <b>x</b> |
|     | nwnknwnwvwaearmfl     | 94,13    | 26,33    | dwnknwnwvwaearmfl     | 33,02    |
|     | nwnknwnwvwaearmfl     | 58,44    | 16,35    | dwnknwnwvwaearmfl     | 34,85    |
|     | nwnknwnwvwaearmfl     | 79,60    | 22,26    | nwnknwnwvwaearmfl     | 14,81    |
|     | dwnknwnwvwaearmfl     | 97,48    | 27,27    | dwnknwnwvwaearmfl     | 28,91    |
|     | nwnknwnwvwaearmfl     | 43,31    | 12,11    | dwnknwnwvwaearmfl     | 30,15    |
|     | nwnknwnwvwaearmfl     | 60,17    | 16,83    | nwnknwnwvwaearmfl     | 18,46    |
|     | nwnknwnwvwaearmfl     | 44,71    | 12,51    | nwnknwnwvwaearmfl     | 18,38    |
|     | nwnknwnwvwaearmfl     | 41,71    | 11,67    | nwnknwnwvwaearmfl     | 15,55    |
|     | nwnknwnwvwaearmfl     | 39,43    | 11,03    | nwnknwnwvwaearmfl     | 14,81    |
|     | wkktwvfwaklrpel       | 38,16    | 10,67    | dwnknwnwvwaearmfl     | 22,10    |
|     | wnsswnwvwaearmfl      | 48,29    | 13,51    | nwnknwnwvwaearmfl     | 13,58    |
|     | tnkdwnwvwaearmfl      | 50,43    | 14,11    | nwnknwnwvwaearmfl     | 15,03    |
|     | qykywvwaearmfl        | 35,09    | 9,81     | nwnknwnwvwaearmfl     | 14,92    |
|     | nwnknwnwvwaearmfl     | 33,67    | 9,42     | dwnknwnwvwaearmfl     | 29,59    |
|     | pnkhwawwagplkkfl      | 36,27    | 10,14    | nwnknwnwvwaearmfl     | 16,74    |
|     | tmsnwnwvwaearmfl      | 37,65    | 10,53    | nwnknwnwvwaearmfl     | 17,50    |
|     | wqwnwnwvwaearmfl      | 21,30    | 5,96     | wkknwnwvwaearmfl      | 18,82    |
|     | dwnknwnwvwaearmfl     | 32,28    | 9,03     | nwnknwnwvwaearmfl     | 14,67    |
|     | tnkdwnwvwaearmfl      | 30,14    | 8,43     | nwnknwnwvwaearmfl     | 22,56    |
|     | nwnknwnwvwaearmfl     | 37,41    | 10,46    | nwnknwnwvwaearmfl     | 13,78    |
|     | tvqkgwagalmfl         | 29,28    | 8,19     | nwnknwnwvwaearmfl     | 18,43    |
|     | qakknwnwvwaearmfl     | 33,11    | 9,26     | nwnknwnwvwaearmfl     | 14,41    |
|     | wqwnwnwvwaearmfl      | 28,90    | 8,08     | nwnknwnwvwaearmfl     | 14,53    |
