# Supplementary material for: Molecular Evolution of Peptide Ligands with Custom-Tailored Characteristics for Targeting of Glycostructures
Source: PLoS Comput Biol. 2012 Dec 13;8(12):e1002800. doi: 10.1371/journal.pcbi.1002800 (PMC3521706; doi:10.1371/journal.pcbi.1002800)
Supplement: Table S1 — Identification of lead sequences for the molecular evolution of GM1-binding peptides. (PDF) [file pcbi.1002800.s003.pdf]

**Table S1:**

**Identification of lead sequences for the molecular evolution of G<sub>M1</sub>-binding L-peptides.** 64 Known or alleged G<sub>M1</sub> binding motifs obtained from the literature (compiled in [1]) were synthesized as L-peptides on filter membranes and screened for G<sub>M1</sub> binding with lysoG<sub>M1</sub>-DY650-conjugate. Fitness values reflect the fluorescence intensities of individual peptide areas as determined in a Licor Odyssey Infrared Imager (arbitrary units). Peptides which showed fluorescence signals significantly above background [2] were selected as lead peptides (written in boldface).

| No.       | Sequence                 | Fitness      | No.       | Sequence                | Fitness       |
|-----------|--------------------------|--------------|-----------|-------------------------|---------------|
| 1         | VEVPGQHIDSQKKAIE         | 5,14         | 33        | YSEIAIQMMMHMQPKE        | 7,62          |
| 2         | VPGQHIDSQKKAIERM         | 22,09        | 34        | CEFLVKEVTKLIDNNK        | 50,57         |
| 3         | GQHIDSQKKAIERMKN         | 38,86        | 35        | FLVKEVTKLIDNNKTE        | 57,67         |
| 4         | HIDSQKKAIERMKNTL         | 40,54        | 36        | VKEVTKLIDNNKTEKE        | 17,05         |
| 5         | DSQKKAIERMKNTLRI         | 57,76        | 37        | EVTKLIDNNKTEKEIL        | 5,61          |
| 6         | SQKKAIERMKNTLRIA         | 55,99        | 38        | ASQKRPSQRHGSKYLA        | 56,15         |
| 7         | SQKKAIERMKNTLRIA         | 13,64        | 39        | QKRPSQRHGSKYLATA        | 45,20         |
| 8         | VPGSQHIDSQKKAIER         | 24,05        | 40        | RPSQRHGSKYLATAST        | 36,13         |
| 9         | GSQHIDSQKKAIERMK         | 41,53        | 41        | SQRHGSKYLATASTMD        | 17,07         |
| 10        | QHIDSQKKAIERMKDT         | 16,75        | 42        | RHGSKYLATASTMDHA        | 31,38         |
| 11        | IDSQKKAIERMKDTLR         | 33,05        | 43        | GSKYLATASTMDHARH        | 55,51         |
| 12        | SQKKAIERMKDTLRIA         | 37,23        | 44        | KYLATASTMDHARHGF        | 59,64         |
| 13        | SYTESMAGKREMVIIIT        | 9,60         | 45        | LATASTMDHARHGFLP        | 50,61         |
| 14        | TESMAGKREMVIIITFK        | 49,04        | 46        | TASTMDHARHGFLPRH        | 58,55         |
| 15        | SMAGKREMVIIITFKSG        | 48,01        | 47        | STMDHARHGFLPRHRD        | 49,57         |
| 16        | LEVPTDGNAGLLAEPQ         | 5,36         | 48        | MDHARHGFLPRHRDTG        | 61,29         |
| 17        | VPTDGNAGLLAEPQIA         | 6,87         | 49        | HARHGFLPRHRDTGIL        | 52,37         |
| 18        | TDGNAGLLAEPQIAMF         | 8,39         | 50        | RHGFLPRHRDTGILDS        | 29,82         |
| 19        | GNAGLLAEPQIAMFCG         | 17,33        | 51        | GFLPRHRDTGILDSIG        | 23,39         |
| 20        | AGLLAEPQIAMFCGRL         | 30,50        | <b>52</b> | <b>LPRHRDTGILDSIGRF</b> | <b>104,05</b> |
| 21        | LLAEPQIAMFCGRLNM         | 27,92        | 53        | KYEVNWKTHEIKVKGQ        | 63,41         |
| <b>22</b> | <b>AEPQIAMFCGRLNMHM</b>  | <b>75,37</b> | <b>54</b> | <b>YEVNWKTHEIKVKGQN</b> | <b>77,44</b>  |
| <b>23</b> | <b>PQIAMFCGRLNMHMNV</b>  | <b>83,79</b> | 55        | AEYHNTQIHTLNDKIF        | 18,80         |
| 24        | IAMFCGRLNMHMNVQN         | 60,97        | 56        | ATFQVEVPGSQHIDSQ        | 11,26         |
| 25        | MFCGRLNMHMNVQNGK         | 56,71        | <b>57</b> | <b>AKVEKLCVWNNKTPHA</b> | <b>67,96</b>  |
| 26        | CGRLNMHMNVQNGKWD         | 22,38        | <b>58</b> | <b>GALSETYSFIKEYHNT</b> | <b>78,21</b>  |
| 27        | RLNMHMNVQNGKWDS          | 9,66         | 59        | ESLAGKREQSDIHQSG        | 12,39         |
| 28        | NMHMNVQNGKWDS DPS        | 4,79         | <b>60</b> | <b>ASDWYDEMLTWNHGA</b>  | <b>66,96</b>  |
| <b>29</b> | <b>DFRRLPGAFWQLRQPA</b>  | <b>94,08</b> | 61        | DGTVSTHECRLEYKYP        | 43,00         |
| <b>30</b> | <b>GWWYKGRARPVSAAVAA</b> | <b>72,12</b> | 62        | FSHSGEGDMIWERMID        | 12,94         |
| <b>31</b> | <b>VWRL LAPPSNRLLPA</b>  | <b>64,39</b> | <b>63</b> | <b>HHCSILKEVWHVKKLG</b> | <b>74,12</b>  |
| 32        | SQYSEIAIQMMMHMQP         | 9,37         | 64        | PDQDGVVTAMHGFTHN        | 14,38         |

## Identification of lead sequences for the molecular evolution of G<sub>M1</sub>-binding D-peptides.

For the evolution of D-peptides the 64 alleged G<sub>M1</sub> binding motifs of above were transformed from L-peptides into their retro-inverso form (reversal of sequence and use of D-amino acids). Screening of the D-peptides and assignation of fitness values was performed as for the L-peptides.

| No.       | Sequence                  | Fitness       | No.       | Sequence                 | Fitness       |
|-----------|---------------------------|---------------|-----------|--------------------------|---------------|
| 1         | eiakkqsdi hqgpvev         | 1,53          | 33        | ekpqmhmnmqiaiesy         | 1,84          |
| 2         | mreiakkqsdi hqgpv         | 4,35          | 34        | knndilktvekvlfec         | 5,12          |
| 3         | nkmreiakkqsdi hqg         | 10,05         | 35        | etknndilktvekvlf         | 7,20          |
| 4         | ltnkmreiakkqsdi h         | 11,28         | 36        | eketknndilktvekv         | 0,65          |
| 5         | irltnkmreiakkqsd          | 10,09         | 37        | lieketknndilktve         | 0,20          |
| 6         | airltnkmreiakkqs          | 12,97         | 38        | alyksghrqsprkqsa         | 17,01         |
| 7         | iakkqsdi hqsgpvev         | 2,59          | 39        | atalyksghrqsprkq         | 18,53         |
| 8         | reiakkqsdi hqsgpv         | 4,91          | 40        | tsatalyksghrqspr         | 16,25         |
| 9         | kmreiakkqsdi hqsg         | 11,98         | 41        | dmstsatalyksghrqs        | 11,63         |
| 10        | tdkmreiakkqsdi hq         | 6,83          | 42        | ahdmstsatalyksghr        | 10,07         |
| 11        | rltdkmreiakkqsd i         | 5,56          | 43        | hrahdmstsatalyks g       | 3,90          |
| 12        | airltdkmreiakkqs          | 11,73         | 44        | fghrahdmstsataly k       | 35,71         |
| 13        | tiivmerkgamsetys          | 1,63          | <b>45</b> | <b>plfghrahdmstsatal</b> | <b>87,02</b>  |
| 14        | kfttiivmerkgamset         | 26,79         | <b>46</b> | <b>hrplfghrahdmstsat</b> | <b>64,35</b>  |
| 15        | gskfttiivmerkgams         | 21,83         | <b>47</b> | <b>drhrplfghrahdmsts</b> | <b>90,77</b>  |
| 16        | qpeallgangdtpvel          | 1,45          | <b>48</b> | <b>gtdrhrplfghrahdm</b>  | <b>82,55</b>  |
| 17        | aiqpeallgangdtpv          | 1,50          | <b>49</b> | <b>ligtdrhrplfghrah</b>  | <b>77,87</b>  |
| 18        | fmai qpeallgangdt         | 17,73         | 50        | sdligtdrhrplfghr         | 15,55         |
| 19        | gc fmai qpeallgang        | 19,47         | 51        | gisdligtdrhrplfg         | 15,69         |
| <b>20</b> | <b>lrgcfmai qpeallga</b>  | <b>50,05</b>  | <b>52</b> | <b>frgisdligtdrhrpl</b>  | <b>59,27</b>  |
| 21        | mn lrgcfmai qpeall        | 44,35         | 53        | qgkvkiehtkwnveyk         | 22,36         |
| <b>22</b> | <b>mhmn lrgcfmai qpea</b> | <b>53,31</b>  | 54        | nqgkvkiehtkwnvey         | 24,24         |
| <b>23</b> | <b>vnmhmn lrgcfmai qp</b> | <b>51,71</b>  | <b>55</b> | <b>fikdn lthiqtnhyea</b> | <b>75,51</b>  |
| 24        | nqvnmhmn lrgcfmai         | 7,94          | 56        | qsdi hqsgpvevqfta        | 0,92          |
| 25        | kg nqvnmhmn lrgcfm        | 8,74          | 57        | ahptknnwvclkevka         | 8,22          |
| 26        | dwkgnqvnmhmn lrgc         | 4,67          | <b>58</b> | <b>tnhyekifsyteslag</b>  | <b>102,36</b> |
| 27        | dsdwkgnqvnmhmn l r        | 4,46          | 59        | gsqhidsqerkgalse         | -1,23         |
| 28        | spdsdwkgnqvnmhmn          | -1,82         | 60        | aghinwtlmedywdsa         | 9,73          |
| <b>29</b> | <b>apqrlqwfagplrrfd</b>   | <b>157,50</b> | 61        | pykyelrcehtsvtgd         | 6,17          |
| 30        | aavasvprargkywwg          | 28,12         | 62        | dimrewimdgegshsf         | 2,29          |
| <b>31</b> | <b>apllrnsfppallrwv</b>   | <b>52,06</b>  | 63        | glkkvhwveklischh         | 12,78         |
| 32        | pqmhmnmqiaiesyqs          | 1,57          | 64        | nhtfghmatvvgdqdp         | 9,23          |

## References:

- [1] Röckendorf N, Bade S, Hirst T R, Gorris H-H, Frey A (2007) Synthesis of a fluorescent ganglioside G<sub>M1</sub> derivative and screening of a synthetic peptide library for G<sub>M1</sub> binding sequence motifs. *Bioconjugate Chem* 18: 573-578.
- [2] Frey A, Di Canzio J, Zurakowski D (1998) A statistically defined endpoint titer determination method for immunoassays. *J Immunol Methods* 221: 35-41.
